# Supplementary material for: Monitoring the training dose and acute fatigue response during elbow flexor resistance training using a custom-made resistance band
Source: PeerJ. 2020 Feb 25;8:e8689. doi: 10.7717/peerj.8689 (PMC7047867; doi:10.7717/peerj.8689)
Supplement: Supplemental Information 1 [file peerj-08-8689-s001.xlsx]

## Sheet: Sheet1
			Age(Year)	Weight(Kg)	Initial force(N)	1RM(N)	Slope before	Slope after	1MinRec(%Initial)
	S01	Left	34	50	45.1	87.8	-0.0338	-0.0337	8.2519
		Right			58.4	91.6	-0.0593	-0.0686	10.0168
	S02	Left	24	57	42	67.1	-0.0416	-0.0538	8.0303
		Right			44.7	59.5	-0.0265	-0.0931	9.769
	S03	Left	27	48	43	108.6	-0.0358	-0.1279	8.5805
		Right			47.2	111.2	-0.0472	-0.1388	14.8
	S04	Left	28	65	82.5	152.5	-0.0588	-0.1062	11.8603
		Right			91.3	163.2	-0.0802	-0.1366	15.1213
	S05	Left	22	62	65.3	132.2	-0.0561	-0.1341	12.122
		Right			73.4	140.8	-0.0877	-0.2141	15.0937
	S06	Left	29	80	112.8	193.6	-0.0702	-0.0944	10.9639
		Right			120.6	189.6	-0.1017	-0.1571	17.6248

## Sheet: S01-Left hand
Time/s	Force/N
0.404	0
0.496	0.01862
0.588	0
0.68	0
0.772	0
0.864	0
0.956	0
1.048	0
1.14	0
1.232	0
1.324	0
1.416	0
1.508	0
1.6	0
1.692	0
1.783	0
1.875	0
1.968	0
2.06	1.4602
2.152	5.22144
2.243	9.71964
2.335	13.6102
2.427	17.3254
2.52	21.1974
2.612	25.1997
2.703	29.1452
2.795	32.8731
2.887	36.0983
2.979	38.5071
3.072	40.425
3.163	42.2762
3.255	43.8756
3.347	45.0996
3.439	45.9101
3.531	46.256
3.622	46.1943
3.715	46.0032
3.807	45.8846
3.899	45.666
3.991	45.4367
4.083	45.327
4.174	45.2211
4.267	45.1564
4.359	45.1025
4.451	45.0457
4.543	44.9879
4.634	44.9497
4.726	44.8909
4.818	44.835
4.911	44.7762
5.003	44.7537
5.094	44.739
5.186	44.688
5.278	44.6096
5.37	44.6037
5.463	44.5929
5.554	44.5724
5.646	44.5635
5.738	44.5165
5.83	44.4626
5.922	44.346
6.013	43.9677
6.106	43.1357
6.198	41.8578
6.29	40.2172
6.382	38.0838
6.473	35.8866
6.565	32.9848
6.658	29.8929
6.75	26.6178
6.842	22.8399
6.933	19.7274
7.025	16.0945
7.117	13.3064
7.209	10.5624
7.302	8.36528
7.393	6.9286
7.485	5.17342
7.577	4.04054
7.669	3.23694
7.761	2.63718
7.854	2.25302
7.945	1.61014
8.037	0.93198
8.129	0.79576
8.221	0.5439
8.313	0.59192
8.404	0.53704
8.497	0.4312
8.589	0.42238
8.681	0.47922
8.773	0.51058
8.864	0.54096
8.956	0.54684
9.049	0.55076
9.141	0.57624
9.233	0.5831
9.324	0.5635
9.416	0.539
9.508	0.5096
9.601	0.53606
9.693	0.6517
9.784	1.11622
9.876	2.18246
9.968	3.80044
10.06	6.40234
10.152	10.5448
10.244	15.3703
10.336	20.1076
10.428	24.8969
10.52	29.1481
10.612	32.9182
10.703	36.2757
10.796	38.9775
10.888	41.2649
10.98	43.3346
11.072	45.0408
11.163	46.2335
11.255	46.9126
11.347	47.1694
11.44	47.1596
11.532	47.0537
11.623	46.9126
11.715	46.8019
11.807	46.7205
11.899	46.6245
11.992	46.5196
12.083	46.404
12.175	46.3217
12.267	46.2413
12.359	46.1805
12.451	46.1217
12.544	46.0678
12.635	45.9943
12.727	45.863
12.819	45.6749
12.911	45.5827
13.003	45.5034
13.094	45.4387
13.187	45.471
13.279	45.4789
13.371	45.4201
13.462	45.4338
13.554	45.4406
13.646	45.4397
13.739	45.3995
13.831	45.3622
13.922	45.323
14.014	45.2878
14.106	45.1545
14.198	44.7164
14.29	43.5502
14.382	41.9234
14.474	39.6635
14.566	36.9186
14.658	33.7737
14.75	29.5607
14.841	25.5035
14.934	21.6423
15.026	17.4019
15.118	12.6116
15.21	9.15222
15.302	6.14166
15.393	4.13462
15.485	2.15992
15.578	1.37788
15.67	0.18718
15.762	0
15.853	0
15.945	0
16.037	0
16.13	0
16.222	0
16.313	0
16.405	0
16.497	0
16.589	0
16.681	0
16.773	0
16.865	0
16.957	0
17.049	0
17.14	0
17.232	0
17.325	0
17.417	0
17.509	0
17.6	0
17.692	0
17.784	0
17.876	0
17.969	0
18.06	0.29988
18.152	2.9204
18.244	6.98544
18.336	11.0828
18.428	15.78
18.52	20.3507
18.612	25.1321
18.704	29.8939
18.796	33.6581
18.888	36.5726
18.979	39.0726
19.072	41.4511
19.164	43.4855
19.256	45.0271
19.348	45.9502
19.439	46.3109
19.531	46.3266
19.623	46.1129
19.716	45.9708
19.808	45.8944
19.899	45.8052
19.991	45.7386
20.083	45.6896
20.175	45.5827
20.268	45.4583
20.359	45.3818
20.451	45.3652
20.543	45.4446
20.635	45.425
20.727	45.3299
20.818	45.2819
20.911	45.2584
21.003	45.2192
21.095	45.176
21.187	45.1584
21.278	45.1045
21.37	45.0624
21.463	45.0761
21.555	45.0398
21.647	44.9938
21.738	44.9526
21.83	44.9644
21.922	44.9634
22.014	44.8938
22.107	44.834
22.198	44.6165
22.29	43.9256
22.382	42.3742
22.474	40.0673
22.566	37.1547
22.658	33.8982
22.75	30.0194
22.842	26.0915
22.934	22.4185
23.026	18.4544
23.117	15.3958
23.209	12.052
23.302	9.36586
23.394	6.95702
23.486	5.61736
23.577	4.10914
23.669	2.71362
23.761	1.68952
23.854	0.78988
23.946	0
24.037	0
24.129	0
24.221	0
24.313	0
24.406	0
24.497	0
24.589	0
24.681	0
24.773	0
24.865	0
24.956	0
25.049	0
25.141	0
25.233	0
25.325	0
25.416	0
25.508	0
25.601	0
25.693	0
25.785	0
25.876	0
25.968	0
26.06	0.392
26.152	2.7538
26.245	6.8257
26.336	11.2778
26.428	16.1651
26.52	21.7413
26.612	26.56
26.704	30.6965
26.796	34.1148
26.888	36.9068
26.98	39.6351
27.072	41.8509
27.164	43.3846
27.255	44.6615
27.347	45.5886
27.44	46.062
27.532	46.3021
27.624	46.2766
27.715	46.0531
27.807	45.8052
27.899	45.6562
27.992	45.5063
28.084	45.3897
28.175	45.3152
28.267	45.2446
28.359	45.2054
28.451	45.1623
28.544	45.1212
28.635	45.0702
28.727	45.031
28.819	45.0163
28.911	44.9918
29.003	44.9781
29.094	44.9399
29.187	44.8693
29.279	44.8458
29.371	44.8399
29.463	44.8134
29.554	44.7909
29.646	44.8056
29.739	44.8507
29.831	44.8174
29.923	44.7586
30.014	44.6341
30.106	44.1559
30.198	42.9759
30.29	40.9807
30.383	38.663
30.474	36.0679
30.566	32.977
30.658	29.9929
30.75	26.1827
30.842	22.7409
30.934	19.9146
31.026	16.659
31.118	14.1914
31.21	11.5268
31.301	9.55598
31.393	7.62244
31.485	5.6644
31.578	4.26594
31.67	3.38688
31.761	2.68618
31.853	2.10014
31.945	1.55428
32.037	1.0241
32.13	0.53312
32.221	0.20874
32.313	0.0882
32.405	0.0539
32.497	0
32.589	0.00882
32.68	0.01666
32.773	0.01274
32.865	0.01666
32.957	0.05978
33.049	0.0735
33.14	0.05194
33.232	0.04704
33.325	0.0343
33.417	0.03136
33.509	0.04606
33.6	0.0539
33.692	0.04312
33.784	0.1078
33.876	0.2842
33.969	0.5929
34.06	1.50822
34.152	4.2924
34.244	8.65536
34.336	14.1179
34.428	19.5177
34.52	24.3824
34.612	28.5533
34.704	32.048
34.796	34.7185
34.888	37.2057
34.979	39.6371
35.072	41.649
35.164	43.3209
35.256	44.8605
35.348	45.7239
35.439	45.8885
35.531	45.8023
35.623	45.6425
35.716	45.5396
35.808	45.4514
35.899	45.3554
35.991	45.2819
36.083	45.1398
36.175	44.984
36.268	44.8889
36.359	44.7978
36.451	44.7164
36.543	44.6606
36.635	44.5763
36.727	44.4793
36.818	44.4107
36.911	44.3577
37.003	44.3244
37.095	44.2872
37.187	44.2588
37.278	44.2088
37.37	44.1813
37.463	44.1559
37.555	44.0971
37.647	43.9834
37.738	43.7129
37.83	43.1416
37.922	42.1057
38.014	40.6749
38.107	38.9109
38.198	36.7118
38.29	33.955
38.382	31.7471
38.474	29.7871
38.566	27.4978
38.658	24.9439
38.75	22.197
38.842	19.2394
38.934	15.7858
39.026	12.2667
39.117	8.6289
39.209	6.31708
39.302	4.1993
39.394	2.45686
39.486	1.28478
39.577	0.4949
39.669	0
39.761	0
39.854	0
39.946	0
40.037	0
40.129	0
40.221	0
40.313	0
40.406	0
40.497	0
40.589	0
40.681	0
40.773	0
40.865	0
40.956	0
41.049	0
41.141	0
41.233	0
41.325	0
41.416	0
41.508	0
41.601	0
41.693	0
41.785	0
41.876	0.18816
41.968	0.82908
42.06	2.2981
42.152	5.47134
42.245	9.61968
42.336	14.4501
42.428	19.2874
42.52	23.9483
42.612	27.9633
42.704	31.3228
42.796	34.0697
42.888	36.4531
42.98	38.7384
43.072	40.7288
43.164	42.1096
43.255	43.0357
43.347	43.7002
43.44	44.0285
43.532	44.0373
43.624	44.0745
43.715	44.1029
43.807	44.0716
43.899	44.004
43.992	43.8501
44.084	43.71
44.175	43.6051
44.267	43.5149
44.359	43.4424
44.451	43.3611
44.544	43.2513
44.635	43.1798
44.727	43.1278
44.819	43.0553
44.911	42.9838
45.003	42.9554
45.094	42.9309
45.187	42.8828
45.279	42.825
45.371	42.8015
45.463	42.7946
45.554	42.7662
45.646	42.7045
45.739	42.6908
45.831	42.6839
45.923	42.6369
46.014	42.5937
46.106	42.5075
46.198	42.336
46.29	41.8872
46.383	40.819
46.474	39.102
46.566	36.6481
46.658	33.5395
46.75	30.4819
46.842	26.9098
46.934	23.5063
47.026	20.6349
47.118	17.3832
47.21	15.092
47.302	12.9576
47.393	11.2004
47.485	9.0944
47.578	7.15302
47.67	5.74378
47.762	4.65304
47.853	3.64952
47.945	2.793
48.037	2.16286
48.13	1.71304
48.222	1.3328
48.313	1.07114
48.405	0.8134
48.497	0.79086
48.589	0.7203
48.681	0.64092
48.773	0.59976
48.865	0.56154
48.957	0.53116
49.049	0.54194
49.141	0.59682
49.232	0.62034
49.325	0.61348
49.417	0.61348
49.509	0.60956
49.601	0.61838
49.692	0.59976
49.784	0.57624
49.876	0.55566
49.969	0.55076
50.061	0.7938
50.152	1.91394
50.244	4.41588
50.336	7.71162
50.428	11.6914
50.521	15.6957
50.612	19.6304
50.704	23.9071
50.796	27.7115
50.888	30.82
50.98	33.6934
51.072	36.1444
51.164	38.2866
51.256	40.4025
51.348	42.14
51.44	43.2935
51.531	44.0922
51.623	44.589
51.716	44.6831
51.808	44.6116
51.9	44.4695
51.991	44.346
52.083	44.2519
52.175	44.1608
52.268	44.0902
52.359	43.9961
52.451	43.9079
52.543	43.8491
52.635	43.8031
52.727	43.7688
52.818	43.7276
52.911	43.658
53.003	43.6061
53.095	43.5551
53.187	43.5257
53.278	43.4934
53.37	43.4258
53.463	43.3199
53.555	43.2837
53.647	43.2886
53.738	43.2513
53.83	43.217
53.922	43.1592
54.014	43.0053
54.107	42.6447
54.198	41.7049
54.29	40.1741
54.382	38.365
54.474	36.0767
54.566	33.7267
54.658	31.2767
54.75	28.4445
54.842	25.1439
54.934	21.8001
55.026	18.6514
55.117	15.142
55.209	12.2353
55.302	9.46582
55.394	7.44016
55.486	5.34884
55.577	3.65736
55.669	2.49606
55.761	1.29164
55.854	0.47628
55.946	0
56.037	0
56.129	0
56.221	0
56.313	0
56.406	0
56.497	0
56.589	0
56.681	0
56.773	0
56.865	0
56.956	0
57.049	0
57.141	0
57.233	0
57.325	0
57.416	0
57.508	0
57.601	0
57.693	0
57.785	0
57.876	0
57.968	0
58.06	1.32202
58.152	4.71674
58.245	9.60204
58.336	14.8196
58.428	19.8391
58.52	24.4539
58.612	28.076
58.703	31.0101
58.796	33.9825
58.888	36.8059
58.98	39.1745
59.072	41.0169
59.163	42.4056
59.255	43.3866
59.347	44.0441
59.44	44.3881
59.532	44.3871
59.623	44.1725
59.715	43.9755
59.807	43.8726
59.899	43.7443
59.992	43.6267
60.083	43.5541
60.175	43.4953
60.267	43.3601
60.359	43.2102
60.451	43.1504
60.542	43.0769
60.635	42.9759
60.727	42.8917
60.819	42.8378
60.911	42.7937
61.002	42.7633
61.094	42.7084
61.187	42.6614
61.279	42.6124
61.371	42.5251
61.462	42.4693
61.554	42.4516
61.646	42.4105
61.739	42.4017
61.831	42.3086
61.922	42.1743
62.014	42.0724
62.106	41.8813
62.198	41.4079
62.29	40.3505
62.382	38.9442
62.474	36.9587
62.566	34.6175
62.658	32.1665
62.75	29.3402
62.841	26.3963
62.934	23.322
63.026	20.5722
63.118	17.8487
63.21	15.2566
63.301	13.1908
63.393	11.3513
63.485	9.78628
63.578	8.41428
63.67	7.10696
63.761	5.89274
63.853	4.60796
63.945	3.71714
64.037	3.18402
64.13	2.49018
64.221	1.92962
64.313	1.61406
64.405	1.2103
64.497	0.78988
64.589	0.52234
64.68	0.3087
64.773	0.1274
64.865	0.03038
64.957	0
65.048	0
65.14	0
65.232	0
65.325	0
65.417	0
65.508	0
65.6	0
65.692	0
65.784	0
65.876	0
65.968	0.32046
66.06	1.86984
66.152	4.94018
66.244	9.47856
66.336	14.2453
66.427	18.6621
66.52	22.8977
66.612	26.7001
66.704	30.086
66.796	33.1407
66.887	35.8974
66.979	38.0867
67.072	40.0163
67.164	41.8627
67.256	43.2513
67.347	44.1951
67.439	44.5939
67.531	44.638
67.623	44.54
67.716	44.3666
67.807	44.2343
67.899	44.0833
67.991	43.9501
68.083	43.8599
68.175	43.7864
68.267	43.7266
68.359	43.6776
68.451	43.6218
68.543	43.5208
68.635	43.4503
68.726	43.4356
68.818	43.4512
68.911	43.415
69.003	43.3601
69.095	43.3082
69.186	43.2739
69.278	43.2562
69.37	43.2347
69.463	43.2288
69.555	43.2268
69.646	43.1896
69.738	43.1641
69.83	43.1592
69.922	43.1347
70.014	43.0984
70.106	43.0641
70.198	42.9367
70.29	42.4977
70.382	41.4511
70.474	39.5989
70.565	37.0077
70.658	33.8737
70.75	30.5074
70.842	26.6482
70.934	22.5782
71.025	19.0541
71.117	15.8476
71.209	12.7165
71.302	10.143
71.393	7.89488
71.485	6.1397
71.577	4.57268
71.669	3.03016
71.761	1.90218
71.853	1.40532
71.945	0.88102
72.037	0.35574
72.129	0.098
72.221	0.08526
72.312	0.01862
72.404	0
72.497	0
72.589	0
72.681	0
72.772	0
72.864	0
72.956	0
73.049	0
73.141	0
73.232	0
73.324	0
73.416	0
73.508	0
73.601	0
73.692	0
73.784	0
73.876	0
73.968	0
74.06	0.16268
74.151	1.35436
74.244	3.38002
74.336	6.74926
74.428	11.9276
74.52	17.2656
74.611	22.1411
74.703	26.5384
74.796	30.2183
74.888	33.22
74.98	35.8994
75.071	38.2308
75.163	40.0232
75.255	41.3423
75.347	42.2899
75.44	43.1396
75.531	43.7923
75.623	44.0167
75.715	44.0628
75.807	43.951
75.899	43.7629
75.991	43.6355
76.083	43.4993
76.175	43.413
76.267	43.3493
76.359	43.2709
76.45	43.2033
76.542	43.1308
76.635	43.0828
76.727	43.0289
76.819	42.9789
76.91	42.9593
77.002	42.9505
77.094	42.9318
77.187	42.9015
77.279	42.8799
77.37	42.8446
77.462	42.7868
77.554	42.7398
77.646	42.6957
77.739	42.6947
77.83	42.6525
77.922	42.579
78.014	42.4438
78.106	42.0018
78.197	40.8846
78.289	39.3793
78.382	37.4781
78.474	35.2516
78.566	33.0348
78.657	30.6377
78.749	27.8408
78.841	24.8969
78.934	22.4626
79.026	19.6931
79.117	16.8197
79.209	14.5687
79.301	12.3323
79.393	10.2929
79.485	8.64654
79.577	7.10598
79.669	5.58502
79.761	4.5374
79.853	3.91902
79.945	3.2095
80.036	2.46764
80.129	2.10308
80.221	1.6611
80.313	1.2201
80.405	1.2103
80.496	1.29066
80.588	1.05448
80.68	0.88984
80.773	0.6419
80.865	0.4214
80.956	0.33222
81.048	0.30968
81.14	0.35378
81.232	0.3822
81.325	0.38318
81.416	0.37436
81.508	0.39984
81.6	0.43512
81.692	0.5782
81.784	0.9898
81.875	1.5533
81.968	2.98606
82.06	6.07796
82.152	10.1165
82.244	14.8137
82.335	18.9738
82.427	22.9075
82.52	27.8114
82.612	32.047
82.704	34.645
82.795	37.1048
82.887	39.1755
82.979	40.7847
83.072	42.4252
83.164	43.5659
83.255	44.0089
83.347	43.9981
83.439	43.8256
83.531	43.6639
83.623	43.5257
83.715	43.3885
83.807	43.2827
83.899	43.1827
83.991	43.0808
84.083	42.9926
84.174	42.9269
84.267	42.8897
84.359	42.8152
84.451	42.7378
84.543	42.6741
84.634	42.6202
84.726	42.5506
84.818	42.5134
84.911	42.4438
85.003	42.3154
85.094	42.2537
85.186	42.1655
85.278	42.0469
85.37	41.9812
85.463	41.9509
85.554	41.8754
85.646	41.8333
85.738	41.795
85.83	41.6784
85.922	41.5677
86.013	41.4707
86.106	41.2962
86.198	40.9689
86.29	40.2506
86.382	38.9687
86.473	37.2968
86.565	35.4446
86.658	33.3866
86.75	30.5456
86.842	28.0182
86.933	25.6613
87.025	22.9839
87.117	20.7936
87.209	18.5073
87.302	16.1563
87.393	14.2169
87.485	12.5126
87.577	10.7986
87.669	9.18848
87.761	8.0409
87.853	6.57384
87.945	5.1303
88.037	3.59758
88.129	2.2491
88.221	1.25538
88.312	0.50862
88.404	0.03234
88.497	0
88.589	0
88.681	0
88.772	0
88.864	0
88.956	0
89.049	0
89.141	0
89.232	0
89.324	0
89.416	0
89.508	0
89.601	0
89.692	0
89.784	0
89.876	0
89.968	0
90.06	0
90.151	1.2593
90.244	5.15676
90.336	10.0068
90.428	15.0009
90.519	19.699
90.611	23.9816
90.703	28.1407
90.796	31.899
90.888	34.9007
90.979	37.3586
91.071	39.4744
91.163	41.208
91.255	42.2841
91.347	42.9808
91.439	43.5473
91.531	43.9501
91.623	44.1941
91.715	44.198
91.807	44.0735
91.898	43.9863
91.991	43.8952
92.083	43.7933
92.175	43.7207
92.267	43.657
92.358	43.5767
92.45	43.4944
92.542	43.4365
92.635	43.4091
92.727	43.3826
92.818	43.3385
92.91	43.2886
93.002	43.2454
93.094	43.1945
93.187	43.1494
93.278	43.1298
93.37	43.0975
93.462	43.0622
93.554	43.0259
93.646	42.9916
93.737	42.975
93.83	42.9397
93.922	42.877
94.014	42.7907
94.106	42.5467
94.197	41.8431
94.289	40.5553
94.382	39.1735
94.474	37.4772
94.566	35.3564
94.657	32.783
94.749	29.7616
94.841	26.6344
94.934	23.3936
95.026	20.1116
95.117	16.8756
95.209	14.209
95.301	11.8217
95.393	10.0244
95.485	8.75532
95.577	7.18732
95.669	5.2381
95.761	3.72792
95.853	2.82338
95.945	1.70618
96.036	0.87808
96.129	0.2548
96.221	0
96.313	0
96.405	0
96.496	0
96.588	0
96.68	0
96.773	0
96.865	0
96.956	0
97.048	0
97.14	0
97.232	0
97.325	0
97.416	0
97.508	0
97.6	0
97.692	0
97.784	0
97.875	0
97.968	0
98.06	1.03978
98.152	3.99644
98.244	8.85136
98.335	13.33
98.427	17.1128
98.52	21.0024
98.612	24.8734
98.703	28.4602
98.795	31.7922
98.887	34.6734
98.979	36.9215
99.072	38.7365
99.163	40.2692
99.255	41.6304
99.347	42.6672
99.439	43.3836
99.531	43.8824
99.622	44.2245
99.715	44.441
99.807	44.5322
99.899	44.5322
99.991	44.5322
100.082	44.4842
100.174	44.4254
100.267	44.3656
100.359	44.3225
100.451	44.3078
100.542	44.2989
100.634	44.2989
100.726	44.3352
100.818	44.3695
100.911	44.4195
101.002	44.492
101.094	44.739
101.186	45.1368
101.278	45.3377
101.37	45.2966
101.462	45.276
101.554	45.2084
101.646	45.1016
101.738	44.9673
101.83	44.6958
101.921	44.101
102.013	43.0387
102.106	41.4903
102.198	39.5548
102.29	37.339
102.381	34.8694
102.473	32.2724
102.565	29.6254
102.658	27.1284
102.75	24.3951
102.841	21.6021
102.933	19.1031
103.025	16.6629
103.117	14.3737
103.209	12.2961
103.301	10.4174
103.393	8.70142
103.485	7.00798
103.577	5.61344
103.669	4.68244
103.76	3.8955
103.853	3.0968
103.945	2.35886
104.037	1.56114
104.129	1.09956
104.22	0.69188
104.312	0.50372
104.404	0.37926
104.497	0.29302
104.589	0.24206
104.68	0.22246
104.772	0.21364
104.864	0.28224
104.956	0.27342
105.049	0.27734
105.14	0.2646
105.232	0.2695
105.324	0.25382
105.416	0.23226
105.508	0.21658
105.6	0.22148
105.692	0.1862
105.784	0.14602
105.876	0.25186
105.968	1.225
106.059	3.47312
106.151	6.76396
106.244	11.1612
106.336	15.1488
106.427	18.6582
106.519	22.4724
106.611	26.5286
106.703	30.0644
106.796	33.1034
106.887	35.7788
106.979	38.0622
107.071	39.7214
107.163	41.0875
107.255	42.2576
107.346	43.1896
107.439	44.0353
107.531	44.4685
107.623	44.4361
107.715	44.4724
107.806	44.5782
107.898	44.5302
107.991	44.4067
108.083	44.3225
108.175	44.2186
108.266	44.098
108.358	44.0628
108.45	44.002
108.542	43.9089
108.635	43.855
108.726	43.8481
108.818	43.8374
108.91	43.8256
109.002	43.8217
109.094	43.8246
109.186	43.7923
109.278	43.759
109.37	43.7011
109.462	43.66
109.554	43.6433
109.645	43.5767
109.737	43.5051
109.83	43.3581
109.922	43.0779
110.014	42.628
110.105	41.6804
110.197	40.1594
110.289	38.5199
110.382	36.7539
110.474	34.7047
110.565	32.5193
110.657	29.8675
110.749	27.0549
110.841	24.4285
110.934	21.3905
111.025	17.9899
111.117	14.9313
111.209	12.1324
111.301	10.0587
111.393	7.9772
111.484	6.15636
111.577	4.88334
111.669	3.69166
111.761	2.5676
111.853	1.62288
111.944	1.11818
112.036	0.90552
112.129	0.71736
112.221	0.58702
112.313	0.54684
112.404	0.42336
112.496	0.37926
112.588	0.3185
112.68	0.27342
112.773	0.1911
112.864	0.13132
112.956	0.1323
113.048	0.12936
113.14	0.10976
113.232	0.098
113.324	0.06664
113.416	0.03234
113.508	0.0294
113.6	0.0294
113.692	0.02156
113.783	0.05586
113.875	0.38024
113.968	1.9796
114.06	5.74966
114.152	10.144
114.243	14.9881
114.335	19.7029
114.427	23.8238
114.52	27.6144
114.612	30.921
114.703	33.712
114.795	36.2659
114.887	38.8521
114.979	40.7553
115.072	42.0616
115.163	43.1866
115.255	43.904
115.347	44.1951
115.439	44.3675
115.531	44.3519
115.622	44.2862
115.715	44.1804
115.807	44.0637
115.899	44.0334
115.991	44.0187
116.082	43.8746
116.174	43.7511
116.267	43.6688
116.359	43.5287
116.451	43.4032
116.542	43.2905
116.634	43.169
116.726	43.1004
116.818	43.1043
116.911	43.1171
117.002	43.1033
117.094	43.1171
117.186	43.0779
117.278	43.0249
117.37	43.0083
117.462	42.9838
117.554	42.9338
117.646	42.8936
117.738	42.873
117.83	42.8162
117.921	42.7319
118.013	42.628
118.106	42.5261
118.198	42.3654
118.29	42.0185
118.381	41.4315
118.473	40.5524
118.565	39.2519
118.658	37.484
118.75	35.1261
118.841	32.9937
118.933	30.9856
119.025	28.4122
119.117	25.775
119.209	22.7987
119.301	19.9675
119.393	17.3303
119.485	15.2811
119.577	13.3172
119.669	11.6414
119.76	10.438
119.853	9.12282
119.945	7.6881
120.037	6.34256
120.129	5.46252
120.22	4.704
120.312	3.76222
120.404	3.185
120.497	2.68716
120.589	2.24224
120.68	1.90806
120.772	1.4994
120.864	1.0682
120.956	0.66934
121.049	0.40768
121.14	0.34692
121.232	0.3136
121.324	0.29106
121.416	0.26558
121.508	0.25382
121.6	0.2793
121.692	0.30478
121.784	0.34692
121.876	0.3283
121.968	0.2058
122.059	0.2058
122.151	0.33516
122.244	0.77224
122.336	2.52938
122.427	5.09404
122.519	8.16144
122.611	12.446
122.703	16.7717
122.796	20.7201
122.887	24.7489
122.979	28.4131
123.071	31.36
123.163	33.7375
123.255	35.6054
123.347	37.2312
123.439	38.6855
123.531	40.0438
123.623	41.0885
123.715	41.7059
123.806	42.0224
123.898	42.3037
123.991	42.8054
124.083	43.2425
124.175	43.3376
124.266	43.219
124.358	43.0994
124.45	43.02
124.542	42.8662
124.635	42.6947
124.726	42.6643
124.818	42.6133
124.91	42.5604
125.002	42.5438
125.094	42.5114
125.186	42.482
125.278	42.4036
125.37	42.336
125.462	42.286
125.554	42.2615
125.645	42.2311
125.737	42.1851
125.83	42.1674
125.922	42.1508
126.014	42.1145
126.105	42.1037
126.197	42.0626
126.289	42.0067
126.382	41.9087
126.474	41.6725
126.565	41.1482
126.657	40.1898
126.749	39.0403
126.841	37.582
126.934	35.9082
127.025	34.1569
127.117	32.0832
127.209	29.9233
127.301	27.6507
127.393	25.1223
127.484	23.0525
127.577	20.8985
127.669	18.8385
127.761	17.2754
127.853	15.6094
127.944	14.3629
128.036	12.9997
128.129	11.5924
128.221	10.1293
128.313	8.6289
128.404	7.20496
128.496	5.99074
128.588	4.86276
128.68	4.1013
128.773	3.36826
128.864	2.24616
128.956	1.4308
129.048	1.12798
129.14	0.86044
129.232	0.6615
129.324	0.54096
129.416	0.4361
129.508	0.34692
129.6	0.27636
129.692	0.2548
129.783	0.2352
129.875	0.2107
129.968	0.18424
130.06	0.23814
130.152	0.32536
130.243	0.35966
130.335	0.57918
130.427	1.81104
130.52	4.59326
130.612	8.1438
130.703	12.0315
130.795	16.3856
130.887	21.464
130.979	26.1866
131.072	29.5245
131.163	32.1224
131.255	34.2451
131.347	36.0356
131.439	37.7868
131.531	39.5371
131.622	40.9062
131.715	41.7578
131.807	42.3272
131.899	42.6212
131.991	42.7946
132.082	42.9456
132.174	42.9808
132.267	42.926
132.359	42.873
132.451	42.7888
132.542	42.6761
132.634	42.579
132.726	42.5202
132.818	42.4781
132.911	42.4046
133.002	42.2792
133.094	42.1263
133.186	42.0224
133.278	41.9538
133.37	41.9117
133.462	41.8832
133.554	41.8646
133.646	41.848
133.738	41.8372
133.83	41.795
133.921	41.7607
134.013	41.7323
134.106	41.7039
134.198	41.6324
134.29	41.454
134.381	41.0581
134.473	40.1869
134.565	38.8884
134.658	37.3164
134.75	35.4486
134.841	33.5777
134.933	31.3139
135.025	28.6503
135.117	25.8857
135.209	23.2348
135.301	20.7956
135.393	18.5494
135.485	16.5551
135.577	14.6245
135.669	12.885
135.76	11.1465
135.853	9.57852
135.945	8.30452
136.037	6.88058
136.129	5.89372
136.22	4.64618
136.312	3.5525
136.404	2.94588
136.497	2.21088
136.589	1.3426
136.68	0.56938
136.772	0.25578
136.864	0.06958
136.956	0
137.049	0
137.14	0
137.232	0
137.324	0
137.416	0
137.508	0
137.6	0
137.692	0
137.784	0
137.876	0
137.968	0
138.059	0
138.151	0.43022
138.244	3.13404
138.336	8.26924
138.428	13.2633
138.519	18.0937
138.611	22.1803
138.703	25.8867
138.796	29.1717
138.888	31.8412
138.979	34.1216
139.071	36.0934
139.163	37.8133
139.255	39.3029
139.347	40.4534
139.439	41.2913
139.531	42.1175
139.623	42.7956
139.715	43.0514
139.807	43.0485
139.898	42.9505
139.991	42.8711
140.083	42.7231
140.175	42.6476
140.267	42.532
140.358	42.433
140.45	42.3928
140.542	42.3164
140.635	42.2429
140.727	42.1567
140.818	42.0812
140.91	42.0048
141.002	41.9469
141.094	41.9175
141.187	41.8813
141.278	41.8529
141.37	41.7882
141.462	41.7157
141.554	41.6627
141.646	41.6441
141.737	41.6402
141.83	41.6471
141.922	41.6265
142.014	41.5402
142.106	41.2952
142.197	40.6671
142.289	39.7312
142.382	38.6453
142.474	37.1988
142.566	35.7651
142.657	34.1167
142.749	32.1009
142.841	29.8008
142.934	27.0705
143.026	24.304
143.117	21.6688
143.209	18.8503
143.301	17.0843
143.393	15.4556
143.485	14.0836
143.577	12.7772
143.669	11.4699
143.761	10.4703
143.853	9.4423
143.945	8.20554
144.036	7.0658
144.129	6.08188
144.221	5.25574
144.313	4.66088
144.405	4.22282
144.496	3.87296
144.588	3.6799
144.68	3.42216
144.773	2.96744
144.865	2.32652
144.956	1.71892
145.048	0.82712
145.14	0.5684
145.232	0.06566
145.325	0
145.416	0
145.508	0
145.6	0
145.692	0
145.784	0
145.875	0
145.968	0
146.06	0
146.152	0
146.244	0
146.335	0
146.427	2.67736
146.52	6.60422
146.612	10.2694
146.704	14.0816
146.795	18.1202
146.887	22.1823
146.979	25.971
147.072	29.1815
147.164	31.9382
147.255	34.4764
147.347	36.797
147.439	38.6179
147.531	40.0056
147.623	41.2737
147.715	42.2017
147.807	42.6545
147.899	42.9887
147.991	43.3033
148.083	43.6737
148.174	43.9373
148.267	43.9285
148.359	43.7805
148.451	43.6022
148.543	43.4601
148.634	43.2797
148.726	43.121
148.818	42.974
148.911	42.8711
149.003	42.826
149.094	42.7241
149.186	42.6192
149.278	42.5477
149.37	42.4722
149.463	42.3801
149.554	42.3135
149.646	42.2792
149.738	42.2292
149.83	42.1655
149.922	42.1067
150.013	42.0675
150.106	41.9969
150.198	41.943
150.29	41.8999
150.382	41.8235
150.473	41.7284
150.565	41.4981
150.658	40.964
150.75	39.9487
150.842	38.3768
150.933	36.2433
151.025	33.7708
151.117	31.0954
151.209	28.1338
151.302	25.2605
151.393	22.6409
151.485	20.2341
151.577	17.8546
151.669	15.875
151.761	13.9552
151.853	12.1638
151.945	10.8682
152.037	9.25316
152.129	7.3892
152.221	6.3798
152.312	5.41254
152.404	4.18166
152.497	3.11346
152.589	2.34024
152.681	1.6758
152.772	0.686
152.864	0.0294
152.956	0
153.049	0
153.141	0
153.232	0
153.324	0
153.416	0
153.508	0
153.601	0
153.692	0
153.784	0
153.876	0
153.968	0
154.06	0
154.151	0
154.244	0
154.336	0
154.428	0
154.52	0.01274
154.611	2.2491
154.703	5.95644
154.796	10.1949
154.888	14.6628
154.98	18.5181
155.071	22.2832
155.163	26.2415
155.255	29.4294
155.347	31.9999
155.44	34.3764
155.531	36.4482
155.623	38.3396
155.715	39.9272
155.807	41.0571
155.899	41.7745
155.991	42.042
156.083	42.2576
156.175	42.5447
156.267	42.6222
156.359	42.5898
156.45	42.6016
156.542	42.4516
156.635	42.3291
156.727	42.2517
156.819	42.0988
156.91	41.9695
157.002	41.8676
157.094	41.8068
157.187	41.7382
157.279	41.65
157.37	41.5657
157.462	41.4981
157.554	41.4726
157.646	41.4177
157.739	41.3834
157.83	41.3462
157.922	41.3041
158.014	41.2286
158.106	41.1179
158.198	41.0542
158.289	40.9072
158.382	40.6171
158.474	40.2731
158.566	39.8262
158.658	39.1481
158.749	38.0985
158.841	36.7549
158.934	35.0321
159.026	33.1397
159.118	30.8112
159.209	28.0398
159.301	25.5819
159.393	23.1211
159.485	20.6633
159.578	18.3574
159.669	16.3209
159.761	14.553
159.853	12.7831
159.945	11.0789
160.037	9.38448
160.129	7.93604
160.221	6.1691
160.313	3.95724
160.405	1.74244
160.497	0.08722
160.588	0
160.68	0
160.773	0
160.865	0
160.956	0
161.048	0
161.14	0
161.232	0
161.325	0
161.416	0
161.508	0
161.6	0
161.692	0
161.784	0
161.875	0
161.968	0
162.06	0
162.152	0
162.244	0
162.335	0
162.427	1.27302
162.52	4.2091
162.612	8.28786
162.704	12.6057
162.795	16.2758
162.887	19.6519
162.979	23.4387
163.072	27.0284
163.164	30.1615
163.255	32.9956
163.347	35.2918
163.439	37.0499
163.531	38.5424
163.623	39.8586
163.715	41.0081
163.807	41.799
163.899	42.2429
163.991	42.5928
164.083	42.9044
164.174	42.9906
164.267	42.8231
164.359	42.6231
164.451	42.4722
164.543	42.3487
164.634	42.2125
164.726	42.0087
164.818	41.8813
164.911	41.7774
165.003	41.6725
165.094	41.6137
165.186	41.5589
165.278	41.5206
165.37	41.4256
165.463	41.2952
165.554	41.2129
165.646	41.1463
165.738	41.0777
165.83	41.0042
165.921	40.9317
166.013	40.8474
166.106	40.6818
166.198	40.4299
166.29	39.9909
166.381	39.0177
166.473	37.3233
166.565	35.4868
166.658	33.4435
166.75	31.0376
166.841	28.3739
166.933	25.384
167.025	22.6164
167.117	19.9724
167.209	17.5312
167.301	15.2321
167.393	13.3839
167.485	11.7767
167.577	10.1205
167.669	8.58284
167.76	6.65714
167.853	4.85002
167.945	3.7093
168.037	2.50978
168.129	1.58368
168.22	0.94276
168.312	0.01274
168.404	0
168.497	0
168.589	0
168.68	0
168.772	0
168.864	0
168.956	0
169.049	0
169.14	0
169.232	0
169.324	0
169.416	0
169.508	0
169.6	0
169.692	0
169.784	0
169.876	0
169.968	0
170.059	0
170.151	0
170.244	0
170.336	0.47236
170.428	4.38354
170.519	8.8347
170.611	12.9605
170.703	16.9932
170.796	21.1768
170.888	25.3163
170.979	28.3612
171.071	31.2463
171.163	33.859
171.255	36.2375
171.347	38.4336
171.439	40.2104
171.531	41.503
171.623	42.4556
171.715	43.2004
171.807	43.8246
171.898	44.2911
171.991	44.5724
172.083	44.7468
172.175	44.8742
172.267	44.8977
172.358	44.786
172.45	44.689
172.542	44.5998
172.635	44.4998
172.727	44.395
172.818	44.3068
172.91	44.2392
173.002	44.15
173.094	44.0971
173.187	44.003
173.278	43.9432
173.37	43.8932
173.462	43.8511
173.554	43.8383
173.645	43.8119
173.737	43.7472
173.83	43.612
173.922	43.5042
174.014	43.4454
174.105	43.3719
174.197	43.2317
174.289	42.8044
174.382	41.9538
174.474	40.7229
174.565	38.8472
174.657	36.2277
174.749	33.3641
174.841	30.4074
174.934	27.3371
175.025	24.2981
175.117	21.3356
175.209	18.7151
175.301	16.3327
175.393	14.3697
175.484	12.7743
175.577	10.8408
175.669	9.18652
175.761	7.66556
175.853	5.86236
175.944	4.11306
176.036	3.05956
176.129	2.12072
176.221	1.3818
176.313	0.88396
176.404	0.41356
176.496	0.06468
176.588	0
176.68	0
176.773	0
176.864	0
176.956	0
177.048	0
177.14	0
177.232	0
177.324	0
177.416	0
177.508	0
177.6	0
177.692	0
177.783	0
177.875	0
177.968	0
178.06	0
178.152	0
178.243	0
178.335	0.99274
178.427	3.72694
178.52	7.66556
178.612	11.7071
178.703	16.4238
178.795	21.0778
178.887	24.9665
178.979	28.5562
179.072	32.2136
179.163	35.428
179.255	37.4693
179.347	39.0207
179.439	40.6269
179.531	42.1919
179.622	43.4718
179.715	44.0265
179.807	44.1559
179.899	44.0922
179.991	43.8873
180.082	43.7766
180.174	43.7276
180.267	43.5933
180.359	43.4885
180.451	43.3905
180.542	43.2964
180.634	43.2562
180.726	43.2151
180.818	43.17
180.911	43.1416
181.002	43.0994
181.094	43.0641
181.186	43.0935
181.278	43.0524
181.37	42.974
181.462	42.9661
181.554	42.9152
181.646	42.9044
181.738	42.9181
181.83	42.8966
181.921	42.8848
182.013	42.8495
182.106	42.7633
182.198	42.5732
182.29	42.0508
182.381	41.0885
182.473	39.6704
182.565	37.875
182.658	35.8856
182.75	33.6571
182.841	31.1444
182.933	28.5425
183.025	26.0063
183.117	23.3456
183.209	21.07
183.301	18.7592
183.393	16.6169
183.485	14.7127
183.577	12.6126
183.669	10.8907
183.76	9.20514
183.853	7.80864
183.945	6.35628
184.037	4.998
184.129	3.47606
[truncated: 3,628 more rows]

## Sheet: S01-Right hand
Time/s	Force/N
0.404	0
0.496	0
0.588	0.00098
0.68	0
0.773	0.0049
0.864	0.00882
0.956	0.01078
1.048	0.02352
1.14	0.01078
1.232	0.01372
1.324	0.00588
1.416	0
1.508	0.01078
1.6	0.00882
1.692	0.01568
1.783	0.0098
1.875	0.0245
1.968	0.09114
2.06	0.24304
2.152	0.49588
2.244	0.83692
2.335	1.81104
2.427	3.18892
2.52	5.39
2.612	9.65202
2.704	14.3276
2.795	18.5279
2.887	22.2107
2.979	25.3359
3.072	28.3681
3.164	31.5109
3.255	34.5911
3.347	37.5222
3.439	40.4074
3.531	43.2964
3.623	46.1041
3.715	48.7305
3.807	51.207
3.899	53.6256
3.991	55.9021
4.083	57.771
4.174	59.2635
4.267	59.9966
4.359	60.0201
4.451	59.7986
4.543	59.6693
4.634	59.6751
4.726	59.6565
4.818	59.6418
4.911	59.4978
5.003	59.3361
5.094	59.1587
5.186	58.9686
5.278	58.8294
5.37	58.7334
5.463	58.6461
5.555	58.5246
5.646	58.4129
5.738	58.3198
5.83	58.212
5.922	58.1199
6.014	58.0679
6.106	57.9915
6.198	57.917
6.29	57.8533
6.382	57.7759
6.474	57.7122
6.565	57.6671
6.658	57.6299
6.75	57.5975
6.842	57.5681
6.934	57.4995
7.025	57.426
7.117	57.3721
7.209	57.328
7.302	57.2594
7.394	57.0576
7.485	56.544
7.577	55.0976
7.669	52.6819
7.761	49.9447
7.854	47.187
7.945	44.0363
8.037	40.28
8.129	36.8039
8.221	33.3435
8.313	30.1801
8.404	26.6246
8.497	23.0996
8.589	18.8787
8.681	15.1234
8.773	12.7263
8.865	9.81372
8.956	7.42252
9.049	4.79808
9.141	3.2928
9.233	2.43628
9.325	1.76204
9.416	1.71892
9.508	1.54742
9.601	1.50332
9.693	1.50822
9.785	1.5239
9.876	1.5631
9.968	1.53664
10.06	1.56604
10.152	1.59642
10.245	1.61308
10.336	1.60524
10.428	1.617
10.52	1.617
10.612	1.60818
10.704	1.63366
10.796	1.7591
10.888	2.07466
10.98	2.76654
11.072	4.38452
11.164	7.30198
11.255	11.3572
11.347	16.4111
11.44	21.2307
11.532	25.5427
11.624	30.233
11.715	35.3133
11.807	40.033
11.899	44.0824
11.992	47.7544
12.084	51.0051
12.175	53.7461
12.267	56.0893
12.359	58.066
12.451	59.5977
12.544	60.4111
12.635	60.5493
12.727	60.417
12.819	60.1798
12.911	60.0299
13.003	59.8692
13.094	59.6761
13.187	59.4439
13.279	59.239
13.371	59.0381
13.463	58.8049
13.554	58.6109
13.646	58.4501
13.739	58.2777
13.831	58.0964
13.923	57.9229
14.014	57.7818
14.106	57.6573
14.198	57.5534
14.29	57.4692
14.383	57.3349
14.474	57.2075
14.566	57.1428
14.658	57.0664
14.75	56.9723
14.842	56.9155
14.935	56.8273
15.026	56.7449
15.118	56.6577
15.21	56.5303
15.302	56.4313
15.394	56.349
15.485	56.2863
15.578	56.1677
15.67	55.8718
15.762	55.2122
15.854	54.0088
15.945	52.089
16.037	49.7164
16.13	47.1351
16.222	44.3528
16.314	41.357
16.405	37.7859
16.497	34.9125
16.589	31.6952
16.681	27.8937
16.774	24.5167
16.865	20.5016
16.957	17.1324
17.049	13.3868
17.141	10.1675
17.233	8.31922
17.325	5.92704
17.417	4.32376
17.509	2.72146
17.601	1.99822
17.693	1.54056
17.784	1.29458
17.876	1.23284
17.969	1.08094
18.061	1.11524
18.153	1.2152
18.244	1.19658
18.336	1.19364
18.428	1.10642
18.521	1.11622
18.613	1.1368
18.704	1.11132
18.796	1.1025
18.888	1.11328
18.98	1.07114
19.073	1.03096
19.164	1.08584
19.256	1.1564
19.348	1.3328
19.44	2.16286
19.532	4.31592
19.623	7.88998
19.716	12.2343
19.808	17.5293
19.9	22.9104
19.992	28.0809
20.083	32.9731
20.175	37.4223
20.268	41.2845
20.36	44.589
20.452	47.5378
20.543	50.1613
20.635	52.624
20.727	54.9359
20.819	56.9782
20.912	58.5903
21.003	59.2939
21.095	59.3243
21.187	59.0754
21.279	58.752
21.371	58.507
21.463	58.2718
21.555	57.9915
21.647	57.7975
21.739	57.6142
21.831	57.4192
21.923	57.3006
22.014	57.2212
22.107	57.184
22.199	57.1262
22.291	57.0429
22.383	56.989
22.474	56.938
22.566	56.89
22.659	56.8214
22.751	56.7616
22.843	56.6881
22.934	56.6097
23.026	56.4833
23.118	56.3422
23.211	56.2108
23.303	56.1648
23.394	56.1266
23.486	56.0638
23.578	55.9355
23.67	55.7973
23.762	55.6317
23.854	55.3034
23.946	54.731
24.038	53.9206
24.13	52.8475
24.222	51.3314
24.313	49.1656
24.406	46.5451
24.498	43.8668
24.59	40.4397
24.682	37.1165
24.773	33.9648
24.865	30.5897
24.957	27.0215
25.05	23.5053
25.142	19.503
25.233	15.4624
25.325	11.9246
25.417	8.94936
25.509	7.23044
25.602	4.92646
25.694	3.40354
25.785	2.38336
25.877	2.0384
25.969	1.78752
26.061	1.68168
26.153	1.71108
26.245	1.67482
26.337	1.75322
26.429	1.97568
26.521	2.11386
26.613	2.11288
26.704	2.26086
26.797	2.21284
26.889	2.24812
26.981	2.29614
27.073	2.35004
27.164	2.34808
27.256	2.32554
27.348	2.2883
27.441	2.36964
27.533	2.43334
27.624	2.88512
27.716	3.85924
27.808	4.70988
27.9	6.21418
27.993	9.0356
28.084	13.5828
28.176	19.1169
28.268	24.3981
28.36	28.8826
28.452	33.6728
28.544	38.4454
28.636	42.5222
28.728	45.8787
28.82	48.6433
28.912	51.2354
29.003	53.4218
29.095	55.4964
29.188	57.1703
29.28	58.2434
29.372	58.897
29.463	59.2302
29.555	59.3037
29.647	59.192
29.74	59.0146
29.832	58.7951
29.924	58.6265
30.015	58.4678
30.107	58.3208
30.199	58.2022
30.291	58.1081
30.384	58.018
30.475	57.9405
30.567	57.8612
30.659	57.7975
30.751	57.7142
30.843	57.6211
30.935	57.526
31.027	57.4545
31.119	57.3957
31.211	57.2977
31.303	57.1869
31.394	57.087
31.486	56.9576
31.579	56.8008
31.671	56.5254
31.763	56.0217
31.854	55.1456
31.946	53.9176
32.038	52.1291
32.131	49.7007
32.223	47.1899
32.314	44.5616
32.406	41.6539
32.498	38.561
32.59	35.4956
32.683	32.2577
32.774	29.5735
32.866	26.3493
32.958	23.4053
33.05	20.4232
33.142	17.3803
33.233	14.7078
33.326	11.5993
33.418	8.90428
33.51	6.78846
33.602	4.63834
33.693	3.47312
33.785	2.5431
33.878	2.0727
33.97	1.87964
34.062	1.7101
34.153	1.71696
34.245	1.68168
34.337	1.7052
34.429	1.71696
34.522	1.7052
34.613	1.6317
34.705	1.60034
34.797	1.66012
34.889	1.59348
34.981	1.59838
35.074	1.63562
35.165	1.6219
35.257	1.60818
35.349	1.57682
35.441	1.5778
35.533	1.67776
35.624	2.09524
35.717	3.5084
35.809	6.97564
35.901	12.0197
35.993	17.4901
36.084	22.5106
36.176	27.0794
36.269	31.7108
36.361	36.6344
36.452	41.1247
36.544	44.9212
36.636	48.1268
36.728	50.8395
36.82	52.9465
36.913	54.6566
37.004	56.351
37.096	57.7004
37.188	58.5717
37.28	58.9294
37.372	58.9019
37.464	58.8157
37.556	58.6236
37.648	58.4178
37.74	58.2061
37.832	57.9768
37.923	57.7867
38.016	57.6524
38.108	57.4986
38.2	57.3525
38.292	57.2095
38.383	57.0625
38.475	56.9694
38.567	56.8684
38.66	56.7704
38.752	56.7253
38.843	56.6705
38.935	56.5842
39.027	56.5088
39.119	56.4245
39.212	56.3363
39.303	56.2824
39.395	56.2442
39.487	56.155
39.579	55.9835
39.671	55.4876
39.762	54.4419
39.855	52.9367
39.947	51.0462
40.039	48.9667
40.131	46.6421
40.222	43.8697
40.314	41.1727
40.407	38.659
40.499	35.6857
40.591	32.9927
40.682	30.0135
40.774	27.242
40.866	24.989
40.958	22.4675
41.051	20.1047
41.142	17.2519
41.234	14.7029
41.326	12.0256
41.418	9.11008
41.51	6.9433
41.602	5.18812
41.694	3.64266
41.786	2.53722
41.878	1.92864
41.97	1.63758
42.061	1.51018
42.153	1.40728
42.246	1.34554
42.338	1.36416
42.43	1.35436
42.521	1.31222
42.613	1.28968
42.705	1.34162
42.798	1.3573
42.89	1.3279
42.981	1.3181
43.073	1.37396
43.165	1.36416
43.257	1.3377
43.35	1.36024
43.441	1.3573
43.533	1.3916
43.625	1.61014
43.717	2.52448
43.809	4.99604
43.9	9.04638
43.993	13.9474
44.085	19.4736
44.177	24.6754
44.269	29.5999
44.36	34.2
44.452	38.5512
44.545	42.2978
44.637	45.2976
44.729	47.8877
44.82	50.2064
44.912	52.3261
45.004	54.0313
45.096	55.5719
45.189	57.0242
45.28	58.0317
45.372	58.6599
45.464	59.2714
45.556	59.4654
45.648	59.2155
45.74	58.994
45.832	58.8137
45.924	58.555
46.016	58.3012
46.108	58.0444
46.199	57.8739
46.291	57.7367
46.384	57.5809
46.476	57.4584
46.568	57.3565
46.659	57.2614
46.751	57.2026
46.843	57.1526
46.936	57.0899
47.028	57.0458
47.119	56.9723
47.211	56.9008
47.303	56.8184
47.395	56.7204
47.488	56.6136
47.579	56.4313
47.671	56.0531
47.763	55.2877
47.855	53.8726
47.947	52.0262
48.038	49.7624
48.131	47.1605
48.223	44.4342
48.315	41.3433
48.407	37.8025
48.498	34.2677
48.59	31.359
48.683	27.881
48.775	24.6558
48.867	22.3685
48.958	19.5696
49.05	16.3993
49.142	13.7915
49.234	11.0907
49.327	8.62498
49.418	7.007
49.51	5.5223
49.602	4.27084
49.694	3.41138
49.786	2.7881
49.878	2.43334
49.97	2.2491
50.062	2.14424
50.154	2.02566
50.246	1.84142
50.337	1.75714
50.429	1.79242
50.522	1.74538
50.614	1.69932
50.706	1.75518
50.797	1.75714
50.889	1.73754
50.981	1.73754
51.074	1.67384
51.166	1.71402
51.257	1.73754
51.349	1.67678
51.441	1.6072
51.533	1.66306
51.625	2.04918
51.717	3.68578
51.809	7.52052
51.901	12.8762
51.993	18.8787
52.085	24.4882
52.176	29.5078
52.269	34.2128
52.361	38.5532
52.453	42.4507
52.545	45.816
52.636	48.5296
52.728	50.811
52.82	52.8622
52.913	54.686
53.005	55.9943
53.096	57.1389
53.188	57.9788
53.28	58.5001
53.372	58.8176
53.465	58.9147
53.556	58.8323
53.648	58.6559
53.74	58.4815
53.832	58.3031
53.924	58.1375
54.016	58.016
54.108	57.8984
54.2	57.7945
54.292	57.6603
54.384	57.5564
54.476	57.4505
54.567	57.3506
54.66	57.2575
54.752	57.1546
54.844	57.0644
54.936	56.9899
55.027	56.9145
55.119	56.8204
55.212	56.7263
55.304	56.6754
55.395	56.6107
55.487	56.5607
55.579	56.4274
55.671	56.0825
55.763	55.3102
55.855	53.9323
55.947	51.8195
56.039	49.4616
56.131	46.7676
56.223	43.8589
56.314	40.6641
56.407	36.5981
56.499	33.0084
56.591	29.2579
56.683	25.9475
56.774	23.424
56.866	20.1341
56.958	17.6135
57.051	15.141
57.143	12.4832
57.234	10.0852
57.326	7.83706
57.418	6.21124
57.51	4.93528
57.603	3.91804
57.695	3.28692
57.786	2.7391
57.878	2.4206
57.97	2.38728
58.062	2.28144
58.155	2.24028
58.246	2.15208
58.338	2.13542
58.43	2.15894
58.522	2.1266
58.614	2.13346
58.705	2.11092
58.798	2.11386
58.89	2.10994
58.982	2.07956
59.074	2.06388
59.165	2.00312
59.257	1.92472
59.35	1.79046
59.442	1.63954
59.534	1.83554
59.625	2.80672
59.717	5.2381
59.809	9.17476
59.901	14.1149
59.994	20.3546
60.085	25.8318
60.177	30.4878
60.269	34.8263
60.361	39.052
60.453	42.9965
60.545	46.2883
60.637	49.2274
60.729	51.5431
60.821	53.2816
60.913	54.6693
61.004	55.9511
61.096	56.9184
61.189	57.5211
61.281	57.8033
61.373	57.8102
61.464	57.7191
61.556	57.6171
61.648	57.4995
61.741	57.3849
61.833	57.2467
61.924	57.1164
62.016	57.0458
62.108	56.9694
62.2	56.8547
62.292	56.7459
62.384	56.6342
62.476	56.5107
62.568	56.4255
62.66	56.3216
62.752	56.2451
62.843	56.1824
62.936	56.107
63.028	56.0188
63.12	55.9619
63.212	55.9149
63.303	55.8806
63.395	55.8218
63.488	55.7502
63.58	55.6091
63.672	55.2651
63.763	54.4782
63.855	53.2748
63.947	51.7293
64.039	49.6194
64.132	47.2115
64.223	44.3852
64.315	41.4511
64.407	38.7345
64.499	35.9003
64.591	32.8143
64.683	29.1138
64.775	25.8602
64.867	22.0363
64.959	18.1329
65.051	14.8078
65.142	11.2112
65.234	8.92192
65.327	6.92958
65.419	4.81572
65.511	3.0674
65.602	2.16384
65.694	1.5435
65.786	1.27694
65.879	1.13092
65.971	0.97902
66.062	0.89866
66.154	0.8918
66.246	0.85456
66.338	0.8526
66.43	0.87122
66.522	0.90258
66.614	0.90356
66.706	0.90454
66.798	0.90944
66.89	0.93198
66.981	0.9457
67.074	0.96922
67.166	0.95452
67.258	0.9653
67.35	0.95844
67.441	0.92316
67.533	1.1221
67.625	2.71068
67.718	7.26376
67.81	12.6048
67.901	16.9707
67.993	22.146
68.085	26.8971
68.177	31.4874
68.27	36.3854
68.361	40.8043
68.453	44.0177
68.545	46.7137
68.637	49.294
68.729	51.5794
68.82	53.5815
68.913	55.028
69.005	56.1315
69.097	56.9076
69.189	57.2487
69.28	57.2692
69.372	57.0556
69.465	56.8674
69.557	56.6832
69.649	56.4872
69.741	56.2912
69.832	56.1089
69.924	55.9609
70.017	55.7983
70.109	55.6081
70.201	55.3965
70.292	55.2397
70.384	55.0868
70.476	54.9751
70.568	54.8731
70.661	54.7908
70.752	54.7291
70.844	54.6762
70.936	54.6438
71.028	54.6046
71.12	54.5615
71.212	54.5056
71.304	54.4449
71.396	54.4067
71.488	54.3518
71.58	54.2283
71.671	53.8804
71.763	53.1885
71.856	52.0566
71.948	50.521
72.04	48.5913
72.131	46.353
72.223	43.6022
72.315	40.6112
72.408	37.6379
72.5	34.6724
72.591	31.1826
72.683	27.7859
72.775	24.9243
72.867	22.4136
72.96	20.0028
73.051	17.2255
73.143	14.6089
73.235	11.8257
73.327	9.54324
73.419	7.32158
73.51	5.38706
73.603	3.82396
73.695	2.57446
73.787	1.94726
73.879	1.61504
73.97	1.39454
74.062	1.33084
74.155	1.27204
74.247	1.20246
74.339	1.18776
74.43	1.17012
74.522	1.14562
74.614	1.09858
74.706	1.09662
74.799	1.11132
74.89	1.08976
74.982	1.05056
75.074	0.99764
75.166	0.97804
75.258	1.00744
75.35	1.03782
75.442	1.03684
75.534	1.08878
75.626	1.5778
75.718	3.16834
75.809	7.13146
75.901	11.4572
75.994	16.2964
76.086	21.8942
76.178	27.1215
76.269	31.9568
76.361	36.5001
76.453	40.5161
76.546	43.8207
76.638	46.647
76.729	49.0902
76.821	51.1119
76.913	52.9729
77.005	54.683
77.097	56.2069
77.189	57.3349
77.281	57.8768
77.373	58.017
77.465	57.8906
77.557	57.6965
77.648	57.526
77.741	57.3682
77.833	57.2516
77.925	57.133
78.017	57.0321
78.108	56.9194
78.2	56.8096
78.292	56.7204
78.385	56.6469
78.477	56.5499
78.568	56.4333
78.66	56.3324
78.752	56.2873
78.844	56.2167
78.937	56.1354
79.028	56.056
79.12	55.9923
79.212	55.9639
79.304	55.9051
79.396	55.8335
79.488	55.7297
79.58	55.4749
79.672	54.8281
79.764	53.6756
79.856	52.0213
79.947	50.0486
80.039	47.8485
80.132	45.0702
80.224	42.2115
80.316	39.1735
80.407	35.9376
80.499	33.0446
80.591	29.496
80.684	26.1993
80.776	23.2848
80.867	20.3174
80.959	17.8958
81.051	14.8186
81.143	12.3284
81.235	8.8935
81.327	5.6987
81.419	3.94254
81.511	2.35984
81.603	1.67286
81.695	1.25146
81.786	0.91238
81.879	0.7644
81.971	0.7399
82.063	0.69482
82.155	0.66934
82.246	0.65562
82.338	0.6223
82.43	0.64778
82.523	0.66738
82.615	0.63308
82.706	0.62818
82.798	0.65464
82.89	0.65954
82.982	0.64288
83.075	0.64582
83.166	0.6664
83.258	0.66836
83.35	0.66444
83.442	0.65464
83.534	0.6713
83.625	0.74186
83.718	1.02508
83.81	2.32162
83.902	6.31512
83.994	11.2073
84.085	15.4017
84.177	20.6956
84.27	25.6466
84.362	30.8112
84.454	35.7808
84.545	39.9869
84.637	43.266
84.729	45.5435
84.822	47.5427
84.914	49.635
85.005	51.693
85.097	53.5688
85.189	54.7908
85.281	55.5307
85.373	56.0668
85.465	56.3725
85.557	56.5872
85.649	56.7273
85.741	56.6891
85.833	56.6509
85.924	56.544
86.017	56.4382
86.109	56.3451
86.201	56.2059
86.293	56.0707
86.384	55.9698
86.476	55.8727
86.568	55.7865
86.661	55.6238
86.753	55.516
86.844	55.4504
86.936	55.3847
87.028	55.3102
87.12	55.221
87.213	55.1524
87.304	55.0564
87.396	54.9662
87.488	54.8673
87.58	54.6664
87.672	54.2018
87.763	53.2601
87.856	51.843
87.948	49.9908
88.04	47.6554
88.132	44.9085
88.224	41.6608
88.315	38.1886
88.408	34.3608
88.5	30.4192
88.592	26.9235
88.684	23.1515
88.775	20.385
88.867	17.101
88.96	13.6965
89.052	11.0769
89.144	8.0654
89.235	6.14264
89.327	4.4345
89.419	3.00566
89.511	2.401
89.604	1.84044
89.695	1.65914
89.787	1.53664
89.879	1.37298
89.971	1.3426
90.063	1.34652
90.155	1.34162
90.247	1.26812
90.339	1.2495
90.431	1.30732
90.523	1.2446
90.614	1.13974
90.706	1.14856
90.799	1.09074
90.891	1.0878
90.983	1.06918
91.074	1.05546
91.166	1.05742
91.258	1.02704
91.351	1.01822
91.443	1.03292
91.534	1.14366
91.626	1.78262
91.718	4.12874
91.81	8.86998
91.902	14.4158
91.994	20.1958
92.086	25.5035
92.178	30.5936
92.27	35.5495
92.362	40.1437
92.453	43.806
92.546	46.6029
92.638	49.1137
92.73	51.3892
92.822	53.4051
92.913	55.1083
93.005	56.2941
93.097	57.1017
93.19	57.4427
93.282	57.5446
93.373	57.4799
93.465	57.3016
93.557	57.1173
93.649	56.9008
93.742	56.7655
93.834	56.597
93.925	56.446
94.017	56.3755
94.109	56.3235
94.201	56.2383
94.294	56.1354
94.385	56.0335
94.477	55.9492
94.569	55.8816
94.661	55.7992
94.753	55.7003
94.844	55.6072
94.937	55.564
95.029	55.516
95.121	55.4837
95.213	55.4151
95.304	55.2544
95.396	54.98
95.489	54.4811
95.581	53.608
95.673	52.2663
95.764	50.5249
95.856	48.5806
95.948	46.3079
96.04	42.9975
96.133	39.4813
96.224	36.3462
96.316	32.5948
96.408	29.105
96.5	25.5506
96.592	22.343
96.684	18.6925
96.776	15.1724
96.868	12.7175
96.96	10.3802
97.052	8.46916
97.143	6.43468
97.235	4.99016
97.328	3.67892
97.42	2.64502
97.512	2.15698
97.603	1.88944
97.695	1.69442
97.787	1.54252
97.88	1.39944
97.972	1.28184
98.063	1.176
98.155	1.11524
98.247	1.13386
98.339	1.13386
98.432	1.12504
98.523	1.11916
98.615	1.1172
98.707	1.13484
98.799	1.13092
98.891	1.12406
98.982	1.16032
99.075	1.15738
99.167	1.08584
99.259	1.05742
99.351	1.0094
99.442	1.04664
99.534	1.57094
99.627	3.26732
99.719	6.90606
99.811	11.7659
99.902	18.3985
99.994	24.4059
100.086	29.6744
100.178	35.035
100.271	39.5146
100.362	43.416
100.454	46.7538
100.546	49.5449
100.638	51.8469
100.73	53.755
100.822	55.3034
100.914	56.4323
101.006	57.2212
101.098	57.5926
101.19	57.5681
101.281	57.3957
101.373	57.1507
101.466	56.9429
101.558	56.7939
101.65	56.6362
101.741	56.4255
101.833	56.2736
101.925	56.1658
102.018	56.0491
102.11	55.9345
102.201	55.8433
102.293	55.7757
102.385	55.6914
102.477	55.6101
102.569	55.5327
102.661	55.4817
102.753	55.4415
102.845	55.3847
102.937	55.3406
103.029	55.3053
103.12	55.2779
103.213	55.2534
103.305	55.2416
103.397	55.1946
103.489	55.0642
103.58	54.7506
103.672	53.9794
103.764	52.6015
103.857	50.6876
103.949	47.6829
104.04	44.1225
104.132	41.2629
104.224	38.0495
104.316	33.9119
104.409	30.2114
104.5	26.6805
104.592	23.3044
104.684	20.0537
104.776	16.7061
104.868	13.621
104.96	10.5213
105.052	7.82628
105.144	5.88588
105.236	4.07386
105.328	2.9988
105.419	2.26968
105.511	1.87964
105.604	1.6317
105.696	1.37396
105.788	1.29654
105.879	1.28282
105.971	1.17698
106.063	1.14954
106.156	1.21618
106.248	1.20834
106.339	1.21814
106.431	1.2299
106.523	1.20246
106.615	1.22794
106.707	1.25244
106.799	1.25832
106.891	1.25048
106.983	1.26616
107.075	1.3132
107.167	1.29262
107.258	1.3769
107.351	1.37494
107.443	1.37004
107.535	1.63954
107.627	1.96784
107.718	2.9302
107.81	5.33316
107.902	9.3198
107.995	14.7755
108.087	20.0459
108.178	25.089
108.27	29.7234
108.362	33.8737
108.454	37.5918
108.547	41.0042
108.638	43.7345
108.73	46.0198
108.822	48.1004
108.914	50.0447
109.006	51.7812
109.097	53.1787
109.19	54.0431
109.282	54.6164
109.374	54.977
109.466	55.3122
109.557	55.6405
109.649	55.8473
109.742	55.9688
109.834	55.9972
109.926	55.8943
110.017	55.7493
110.109	55.616
110.201	55.47
110.294	55.3602
110.385	55.2348
110.477	55.0936
110.569	54.9927
110.661	54.9476
110.753	54.8624
110.844	54.7761
110.937	54.7663
111.029	54.7369
111.121	54.6977
111.213	54.6693
111.304	54.6213
111.396	54.5586
111.489	54.4478
111.581	54.2165
111.673	53.7207
111.764	52.7162
111.856	50.9326
111.948	48.7021
112.04	46.0865
112.133	43.1729
112.224	39.7753
112.316	35.8347
112.408	32.5164
112.5	28.7934
112.592	25.5878
112.684	23.0418
112.776	20.0978
112.868	17.3068
112.96	14.1463
113.052	11.3249
113.143	8.5848
113.235	6.28376
113.328	4.47468
113.42	3.16246
113.512	2.4549
113.603	1.94236
113.695	1.68952
113.787	1.56702
113.88	1.42982
113.972	1.36416
114.063	1.29654
114.155	1.27302
114.247	1.2495
114.339	1.19462
114.432	1.17796
114.523	1.14758
114.615	1.14464
114.707	1.16522
114.799	1.1368
114.891	1.10936
114.982	1.1172
115.075	1.12112
115.167	1.12602
115.259	1.11328
115.351	1.08682
115.442	1.01822
115.534	1.02312
115.627	1.51116
115.719	3.80632
115.811	9.27374
115.902	16.0005
115.994	22.6488
116.086	27.6213
116.178	32.5056
116.271	36.8039
116.362	40.3054
116.454	43.2366
116.546	45.6817
116.638	48.07
116.73	50.3544
116.822	52.1615
116.914	53.5737
117.006	54.7673
117.098	55.8041
117.189	56.5538
117.281	56.9429
117.373	56.9958
117.466	56.8586
117.558	56.7263
117.649	56.5666
117.741	56.4088
117.833	56.2608
117.925	56.0903
118.018	55.9286
118.109	55.8198
118.201	55.713
118.293	55.6111
118.385	55.5101
118.477	55.4151
118.568	55.3465
118.661	55.2975
118.753	55.2367
118.845	55.1662
118.937	55.1191
119.028	55.0525
119.12	54.9917
119.213	54.8878
119.305	54.7506
119.397	54.6193
119.488	54.2959
119.58	53.7324
119.672	52.8024
119.764	51.1599
119.857	49.0216
119.948	46.6598
120.04	43.9393
120.132	40.9924
120.224	37.6643
120.316	34.593
120.408	31.656
120.5	28.5886
120.592	25.3134
120.684	22.3107
120.775	19.2394
120.867	15.9348
120.96	13.6073
121.052	10.9025
121.144	8.90428
121.235	7.20888
121.327	4.98232
121.419	3.51428
121.511	2.56172
121.604	1.9257
121.695	1.53076
121.787	1.36122
121.879	1.28576
121.971	1.22794
122.063	1.17796
122.155	1.225
122.247	1.24362
122.339	1.19462
122.431	1.18482
122.523	1.19364
122.614	1.2054
122.706	1.19854
122.799	1.19756
122.891	1.20442
122.983	1.19756
123.074	1.19364
123.166	1.21226
123.258	1.20148
123.351	1.16326
123.443	1.1515
123.534	1.22794
123.626	1.82084
123.718	3.70538
123.81	6.80806
123.901	10.4272
123.994	15.4869
124.086	20.5869
124.178	24.9939
124.27	29.0884
124.361	33.6904
124.453	38.3562
124.546	42.1478
124.638	45.1457
124.73	47.7564
124.821	50.0359
124.913	52.0321
125.005	53.556
125.097	54.6634
125.19	55.32
125.281	55.6777
125.373	55.8688
125.465	55.8394
125.557	55.7591
125.649	55.566
125.741	55.4357
125.833	55.2985
125.925	55.1436
126.017	55.0094
126.109	54.8428
126.2	54.6987
126.292	54.538
126.385	54.4067
126.477	54.3057
126.569	54.1666
126.66	54.0519
126.752	53.9372
126.844	53.8245
126.937	53.7501
127.029	53.6824
127.12	53.6158
127.212	53.4933
127.304	53.3002
127.396	53.1523
127.489	52.9612
127.58	52.6799
127.672	52.1566
127.764	51.0943
127.856	49.6978
127.948	48.1699
128.039	46.2001
128.132	43.9638
128.224	41.2521
128.316	38.2837
128.408	35.1555
128.499	31.653
128.591	28.5699
128.684	25.0674
128.776	22.0667
128.868	19.4158
128.959	16.5022
129.051	14.2316
129.143	11.3611
129.235	8.8886
129.327	6.93448
129.419	4.72752
129.511	3.41824
129.603	2.50782
129.695	1.96098
129.786	1.72284
129.879	1.47098
129.971	1.274
130.063	1.24558
130.155	1.23186
130.246	1.38376
130.338	1.41414
130.43	1.38376
130.523	1.39552
130.615	1.38866
130.706	1.32692
130.798	1.27498
130.89	1.21912
130.982	1.17502
131.075	1.18874
131.166	1.27106
131.258	1.33378
131.35	1.42002
131.442	1.85416
131.534	3.70048
131.625	7.34216
131.718	11.9697
131.81	17.0873
131.902	22.4048
131.994	27.4704
132.085	32.6105
132.177	37.192
132.27	40.9072
132.362	44.3264
132.454	47.3007
132.545	49.6821
132.637	51.7489
132.729	53.4933
132.822	54.6536
132.914	55.2965
133.005	55.5199
133.097	55.7022
133.189	55.7904
133.281	55.6924
133.373	55.5444
133.465	55.3984
133.557	55.2534
133.649	55.1221
133.741	54.9584
133.833	54.8212
133.924	54.7291
134.017	54.5938
134.109	54.486
134.201	54.3822
134.292	54.2959
134.384	54.2283
134.476	54.1685
134.568	54.1215
134.661	54.0715
134.752	54.0078
134.844	53.9627
134.936	53.9049
135.028	53.8441
135.12	53.7883
135.212	53.7373
135.304	53.6697
135.396	53.5825
135.488	53.4982
135.58	53.3169
135.671	52.918
135.763	52.0743
135.856	50.6307
135.948	48.6286
136.04	46.4422
136.131	43.8628
136.223	40.8239
136.315	37.3351
136.408	33.6963
136.5	30.2467
136.591	26.4032
136.683	23.5621
136.775	20.3095
136.867	16.8678
136.96	14.0552
137.051	10.925
137.143	8.50836
137.235	6.26612
137.327	4.5913
137.419	3.38786
137.51	2.62052
137.603	2.13346
137.695	1.79634
137.787	1.5974
137.878	1.42884
137.97	1.4945
138.062	1.3965
138.155	1.32006
138.247	1.2936
138.338	1.23186
138.43	1.21324
138.522	1.1466
138.614	1.13582
138.706	1.12602
138.798	1.12014
138.89	1.19658
138.982	1.19364
139.074	1.16326
139.166	1.14954
139.257	1.0829
139.35	1.04076
139.442	1.07016
139.534	1.11524
139.626	1.3867
139.717	2.55878
139.809	5.3998
139.901	9.69318
139.994	15.0959
140.086	20.8995
140.177	26.0876
140.269	31.1885
140.361	35.7514
140.453	39.7566
140.546	43.1494
140.637	46.0453
140.729	48.7501
140.821	51.0845
140.913	52.8044
141.005	54.2832
141.096	55.4523
141.189	56.1569
141.281	56.3245
141.373	56.2422
141.465	56.0717
141.556	55.8933
141.648	55.7032
141.741	55.4749
141.833	55.2798
141.924	55.1495
142.016	55.0025
142.108	54.8281
142.2	54.686
142.292	54.5439
142.384	54.3871
142.476	54.2548
142.568	54.1313
142.66	53.999
142.752	53.8892
142.843	53.7706
142.936	53.6893
143.028	53.6344
143.12	53.51
143.212	53.4512
143.303	53.3924
143.395	53.3287
143.488	53.216
143.58	52.921
143.672	52.234
143.763	50.9296
143.855	49.1842
143.947	47.14
144.039	44.4783
144.132	41.3237
144.223	37.8015
144.315	34.2138
144.407	30.5064
144.499	26.8941
144.59	23.1231
144.683	20.3732
144.775	17.9007
144.867	16.0573
144.959	14.4452
145.05	12.542
145.142	10.9907
145.234	8.96112
145.327	7.31668
145.419	5.7624
145.51	4.35806
145.602	3.4104
145.694	2.597
145.786	2.16188
145.879	1.82084
145.97	1.70618
146.062	1.62386
146.154	1.61798
146.246	1.57094
146.338	1.48372
146.429	1.4945
146.522	1.44844
146.614	1.39552
146.706	1.32888
146.798	1.22696
146.889	1.20932
146.981	1.2201
147.074	1.15836
147.166	1.13386
147.258	1.17012
147.349	1.2936
147.441	1.49646
147.533	2.48038
147.625	5.13422
147.717	9.7461
147.809	14.8597
147.901	19.8274
147.993	24.7489
148.085	29.5999
148.176	33.8423
148.269	37.9231
148.361	41.9205
148.453	45.1094
148.545	47.8407
148.636	50.0202
148.728	51.7068
148.82	53.1758
148.913	54.1901
149.005	54.6918
149.096	54.7242
149.188	54.6487
149.28	54.584
149.372	54.4566
149.465	54.3361
149.556	54.2146
149.648	54.0264
149.74	53.851
149.832	53.7128
149.924	53.5511
150.016	53.4296
150.108	53.2973
150.2	53.1513
150.292	53.0366
150.384	52.9288
150.475	52.8406
150.567	52.772
150.66	52.7054
150.752	52.6289
150.843	52.579
150.935	52.5486
151.027	52.4868
151.119	52.3967
151.212	52.2859
151.303	52.2301
151.395	52.1948
151.487	52.1046
151.579	51.9518
151.671	51.6235
151.762	51.0462
151.855	50.1182
151.947	48.7462
152.039	46.7382
152.131	44.3244
152.222	42.2008
152.314	39.8831
152.407	37.2655
152.499	34.4872
152.591	31.2914
152.682	28.7071
152.774	26.0984
152.866	23.8914
152.958	21.8334
153.051	19.6392
153.142	17.7233
153.234	15.7643
153.326	14.1169
153.418	12.1598
153.51	9.87448
153.602	8.06442
153.694	6.27984
153.786	4.64324
153.878	3.50154
153.969	2.72342
154.061	2.156
154.153	1.81104
154.246	1.58956
154.338	1.52684
154.429	1.36906
154.521	1.24362
154.613	1.22304
154.705	1.20834
154.798	1.16718
154.889	1.13484
154.981	1.14268
155.073	1.15248
155.165	1.0976
155.257	1.07016
155.348	1.1858
155.441	1.30634
155.533	1.4161
155.625	2.15012
155.717	3.96998
155.808	7.52248
155.9	12.2314
155.993	17.1725
156.085	22.1186
156.177	27.5204
156.268	33.3523
156.36	38.1661
156.452	42.0959
156.545	45.4338
156.637	48.3806
156.728	50.9277
156.82	53.0494
156.912	54.7085
157.004	55.4523
157.096	55.6905
157.188	55.6346
157.28	55.3239
157.372	55.1083
157.464	54.9408
157.556	54.7683
157.647	54.6497
157.74	54.5047
157.832	54.2704
157.924	54.0294
158.016	53.8108
158.107	53.6942
158.199	53.5619
158.291	53.3894
158.384	53.2581
158.475	53.1885
158.567	53.1415
158.659	53.0905
158.751	53.017
158.843	52.9396
158.935	52.8504
159.027	52.771
159.119	52.7113
159.211	52.6613
159.303	52.5995
159.394	52.5672
159.486	52.4829
159.579	52.3859
159.671	52.2075
159.763	51.8214
159.854	51.059
159.946	49.8516
160.038	48.0955
160.131	46.0267
160.223	44.051
160.314	41.5549
160.406	38.9452
160.498	35.918
160.59	32.6605
160.683	29.696
160.774	26.5012
160.866	23.7346
160.958	20.5075
161.05	17.1255
161.142	14.5412
161.233	11.8168
161.326	9.46288
161.418	7.30002
161.51	5.28612
161.602	3.88178
161.693	2.78026
161.785	2.07858
161.878	1.85024
161.97	1.51214
162.061	1.3279
162.153	1.28282
162.245	1.15346
162.337	1.06526
162.429	0.9506
162.521	0.92218
162.613	0.86436
162.705	0.87122
162.797	0.86436
162.889	0.83398
162.98	0.82516
163.073	0.79184
163.165	0.77714
163.257	0.79968
163.349	0.77714
163.44	0.81732
163.532	1.0829
163.624	2.0041
163.717	5.22144
163.809	10.1665
163.9	14.9176
163.992	20.2223
164.084	25.2909
164.176	30.5094
164.269	35.2026
164.36	39.3401
164.452	42.7162
164.544	45.4798
164.636	48.1082
164.728	50.4269
164.819	52.2614
164.912	53.4737
165.004	54.438
165.096	55.2348
165.188	55.5974
165.279	55.6405
165.371	55.4837
165.464	55.2769
165.556	55.0858
165.648	54.8839
165.739	54.7046
165.831	54.5174
165.923	54.3155
166.016	54.1391
166.108	54.0411
166.199	53.9862
166.291	53.9314
166.383	53.851
166.475	53.8138
166.566	53.7716
166.659	53.7207
166.751	53.6521
166.843	53.5727
166.935	53.5227
167.026	53.4629
167.118	53.412
167.211	53.3679
167.303	53.3424
167.395	53.3385
167.486	53.1954
167.578	52.7838
167.67	52.1919
167.762	51.302
167.855	49.8693
167.946	48.022
168.038	45.7474
168.13	43.367
168.222	40.9199
168.314	37.7222
168.406	34.3274
168.498	30.9562
168.59	27.2332
168.682	24.3981
168.774	21.807
168.865	19.2296
168.957	17.2411
169.05	15.0244
169.142	12.9115
169.234	10.6261
169.325	8.3839
169.417	6.25534
169.509	4.17382
169.602	2.67736
169.694	1.89924
169.785	1.42884
169.877	1.08584
169.969	0.91826
170.061	0.79772
170.153	0.70266
170.245	0.68698
170.337	0.63014
170.429	0.63504
170.521	0.6321
170.613	0.61544
170.704	0.61054
170.797	0.58408
170.889	0.5831
170.981	0.5978
171.072	0.60074
171.164	0.61152
171.256	0.5831
171.348	0.57722
171.441	0.60662
171.532	0.6762
171.624	0.89278
171.716	1.53762
171.808	3.02526
171.9	5.78788
171.992	9.87056
172.084	15.633
172.176	21.4512
172.268	26.7638
172.36	31.9725
172.451	36.3933
172.544	40.3642
172.636	43.5159
172.728	45.9953
172.82	48.3003
172.911	50.4582
173.003	52.0008
173.095	52.6701
173.188	53.608
173.28	54.7007
173.371	55.3347
173.463	55.5562
173.555	55.4651
173.647	55.3259
173.739	55.1818
173.831	55.029
173.923	54.878
174.015	54.7546
174.107	54.6252
174.198	54.5252
174.29	54.4233
174.383	54.3332
174.475	54.2763
174.567	54.1969
174.658	54.0999
174.75	54.0058
174.842	53.9353
174.935	53.8187
175.027	53.6246
175.118	53.5443
175.21	53.4933
175.302	53.4296
175.394	53.2993
175.486	53.114
175.578	52.8534
175.67	52.2634
175.762	51.205
175.854	49.884
175.946	48.3258
176.037	46.6206
176.13	44.6851
176.222	42.6094
176.314	40.1947
176.406	37.5879
176.497	35.1683
176.589	32.7134
176.681	30.1262
176.774	27.2665
176.866	24.3579
176.957	21.7266
177.049	19.1198
177.141	16.6208
177.233	14.1649
177.326	11.1642
177.417	8.40252
177.509	6.65518
177.601	4.55994
177.693	3.21244
177.784	2.25302
177.876	1.64444
177.969	1.48176
178.061	1.24852
178.153	1.08878
178.244	1.04468
178.336	0.97706
178.428	0.95844
178.521	0.9212
178.613	0.92708
178.704	0.93002
178.796	0.89768
178.888	0.882
178.98	0.86142
179.073	0.8771
179.164	0.87514
179.256	0.87808
179.348	0.86926
179.44	0.86044
179.532	0.84868
179.623	0.83104
179.716	0.8477
179.808	0.92414
179.9	1.2054
179.992	1.9747
180.083	3.46724
180.175	5.98486
180.268	9.23258
180.36	13.5877
180.451	18.1898
180.543	22.7203
180.635	27.1529
180.727	31.2189
180.819	35.0918
180.911	38.8315
181.003	42.2135
181.095	45.0477
181.187	47.4281
181.279	49.6125
181.37	51.2952
181.463	52.3604
181.555	52.9553
181.647	53.1709
181.739	53.2013
181.83	53.1964
181.922	53.1366
182.014	52.9896
182.107	52.7965
182.199	52.6113
182.29	52.3947
182.382	52.2301
182.474	52.0439
182.566	51.7754
182.659	51.7597
182.75	51.6793
182.842	51.6734
182.934	51.547
183.026	51.4118
183.118	51.452
183.209	51.3216
183.302	51.1972
183.394	51.0796
183.486	50.9277
183.578	50.813
183.669	50.6836
183.761	50.665
183.854	50.6337
183.946	50.6258
184.037	50.6199
184.129	50.5533
[truncated: 3,558 more rows]

## Sheet: S02-Left hand
Time/s	Force/N
0.404	0
0.496	0
0.588	0
0.68	0
0.773	0
0.864	0
0.956	0
1.048	0
1.14	0
1.232	0
1.325	0
1.416	0
1.508	0
1.6	0
1.692	0
1.784	0
1.875	0.09408
1.968	0.56644
2.06	2.86846
2.152	9.77452
2.244	16.6208
2.335	22.3842
2.427	27.0108
2.52	30.967
2.612	34.545
2.704	37.731
2.796	40.5259
2.887	42.7084
2.979	43.7668
3.072	43.855
3.164	43.6482
3.256	43.4316
3.347	43.2856
3.439	43.1984
3.531	43.0534
3.623	42.828
3.716	42.6075
3.808	42.4399
3.899	42.2968
3.991	42.1508
4.083	42.0587
4.175	41.9891
4.268	41.9175
4.359	41.8685
4.451	41.8215
4.543	41.7529
4.635	41.6696
4.727	41.6157
4.818	41.5765
4.911	41.5108
5.003	41.3962
5.095	41.3099
5.187	41.26
5.279	41.1904
5.37	41.1237
5.463	41.0659
5.555	41.0316
5.647	41.0297
5.739	41.062
5.83	41.4334
5.922	42.1459
6.014	42.3664
6.107	42.2272
6.199	42.1008
6.291	41.9636
6.382	41.7519
6.474	40.9748
6.566	37.6006
6.659	28.5699
6.751	12.7733
6.842	2.5774
6.934	0.92414
7.026	0.07938
7.118	0.4312
7.211	0.18228
7.302	0.14014
7.394	0.09702
7.486	0.10192
7.578	0.11172
7.67	0.1127
7.762	0.1421
7.854	0.12446
7.946	0.10388
8.038	0.10094
8.13	0.11172
8.222	0.11662
8.313	0.09212
8.406	0.11172
8.498	0.098
8.59	0.11662
8.682	0.13426
8.774	0.07938
8.865	0.05684
8.957	0.08134
9.05	0.09506
9.142	0.098
9.234	0.10878
9.325	0.09898
9.417	0.0784
9.509	0.1323
9.602	0.69482
9.694	4.0278
9.785	14.4746
9.877	25.1654
9.969	32.0264
10.061	36.6922
10.153	40.0418
10.246	42.2027
10.337	43.1494
10.429	43.2062
10.521	42.9318
10.613	42.6114
10.705	42.4232
10.797	42.2213
10.889	42.0841
10.981	41.993
11.073	41.893
11.165	41.7862
11.256	41.7206
11.348	41.6823
11.441	41.6235
11.533	41.551
11.625	41.4354
11.717	41.3335
11.808	41.3011
11.9	41.2776
11.993	41.2404
12.085	41.2325
12.177	41.211
12.268	41.1904
12.36	41.1522
12.452	41.1463
12.545	41.1492
12.637	41.1198
12.729	41.0679
12.82	41.0444
12.912	41.0885
13.004	41.1012
13.096	41.0453
13.189	41.0081
13.28	41.0885
13.372	41.112
13.464	41.113
13.556	41.112
13.648	41.111
13.74	40.9542
13.832	39.5391
13.924	34.3872
14.016	22.7977
14.108	7.44016
14.2	1.65914
14.291	0.42336
14.384	0
14.476	0.03626
14.568	0.20188
14.66	0.1372
14.751	0.14504
14.843	0.10192
14.936	0.13132
15.028	0.15778
15.12	0.1764
15.212	0.18522
15.303	0.1666
15.395	0.16758
15.488	0.15974
15.58	0.14896
15.672	0.14112
15.763	0.15974
15.855	0.15582
15.947	0.16954
16.039	0.1715
16.132	0.147
16.224	0.13132
16.315	0.14994
16.407	0.16562
16.499	0.16366
16.591	0.15386
16.684	0.13132
16.775	0.1225
16.867	0.12936
16.959	0.12936
17.051	0.1372
17.143	0.15582
17.235	0.20286
17.327	0.59878
17.419	2.85474
17.511	10.9113
17.603	20.2605
17.695	27.1646
17.786	32.29
17.879	36.1934
17.971	39.3343
18.063	41.895
18.155	43.5306
18.246	43.9363
18.338	43.8442
18.43	43.6639
18.523	43.4601
18.615	43.2533
18.707	43.1014
18.798	43.0151
18.89	42.9318
18.982	42.8456
19.075	42.7897
19.167	42.7554
19.258	42.7211
19.35	42.6633
19.442	42.631
19.534	42.6712
19.627	42.6496
19.719	42.5702
19.81	42.4997
19.902	42.435
19.994	42.385
20.086	42.3399
20.178	42.2458
20.27	42.19
20.362	42.1537
20.454	42.1322
20.546	42.089
20.638	42.041
20.73	41.995
20.822	41.9558
20.914	41.9362
21.006	41.9185
21.098	41.9058
21.19	41.9175
21.281	41.9136
21.373	41.8695
21.466	41.8372
21.558	41.8195
21.65	41.8225
21.742	41.8068
21.833	41.7127
21.925	40.8993
22.018	38.1161
22.11	30.5789
22.202	14.4844
22.293	3.1556
22.385	1.6464
22.477	0
22.569	0
22.662	0.14602
22.754	0.1078
22.845	0.15876
22.937	0.1323
23.029	0.17836
23.121	0.18914
23.214	0.2107
23.305	0.2058
23.397	0.20384
23.489	0.1764
23.581	0.17444
23.673	0.147
23.766	0.14602
23.857	0.15092
23.949	0.1078
24.041	0.07938
24.133	0.07252
24.225	0.06762
24.316	0.06566
24.409	0.12446
24.501	0.1813
24.593	0.15778
24.685	0.1715
24.777	0.19012
24.868	0.19404
24.961	0.13524
25.053	0.1176
25.145	0.09016
25.237	0.09506
25.328	0.10094
25.42	0.03332
25.512	0
25.605	0.0539
25.697	0.39494
25.788	1.58564
25.88	7.37352
25.972	17.3244
26.064	25.3898
26.157	31.1865
26.249	35.8484
26.34	39.6439
26.432	42.0587
26.524	43.0945
26.616	43.3758
26.708	43.3111
26.8	43.1514
26.892	43.0475
26.984	42.9652
27.076	42.8133
27.168	42.6761
27.259	42.6457
27.352	42.632
27.444	42.5741
27.536	42.4899
27.628	42.3899
27.72	42.3027
27.811	42.2194
27.904	42.1194
27.996	42.0449
28.088	41.9959
28.18	41.9577
28.271	41.9832
28.363	42.0655
28.455	42.0489
28.548	41.992
28.64	41.9754
28.732	41.9714
28.823	41.9381
28.915	41.9469
29.007	41.9303
29.1	41.9538
29.192	42.0283
29.283	42.0018
29.375	41.9626
29.467	41.9215
29.559	41.795
29.651	41.5755
29.743	40.8915
29.835	38.1367
29.927	32.7457
30.019	22.1059
30.111	6.05542
30.203	0.71442
30.295	0.63798
30.387	0
30.479	0
30.571	0
30.663	0
30.754	0
30.846	0
30.939	0
31.031	0
31.123	0
31.214	0
31.306	0
31.398	0
31.491	0
31.583	0
31.675	0
31.766	0.1127
31.858	0.0882
31.95	0.06762
32.043	0.11074
32.135	0.07154
32.226	0.08526
32.318	0.09702
32.41	0.09408
32.502	0.07644
32.594	0.06958
32.686	0.09114
32.778	0.13034
32.87	0.14014
32.962	0.10976
33.054	0.12152
33.146	0.13426
33.238	0.10584
33.33	0.27734
33.422	1.49548
33.514	7.13538
33.606	17.3725
33.697	25.381
33.789	31.1807
33.882	35.38
33.974	38.1632
34.066	40.133
34.158	41.7882
34.249	42.8897
34.341	43.217
34.434	43.1808
34.526	43.1082
34.618	42.9995
34.709	42.925
34.801	42.972
34.893	42.8672
34.985	42.7564
35.078	42.6339
35.169	42.5006
35.261	42.4095
35.353	42.287
35.445	42.19
35.537	42.093
35.63	41.9969
35.721	41.897
35.813	41.8342
35.905	41.7784
35.997	41.748
36.089	41.7186
36.18	41.7235
36.273	41.7039
36.365	41.6598
36.457	41.6177
36.549	41.5922
36.641	41.5579
36.732	41.5108
36.825	41.4903
36.917	41.4638
37.009	41.4364
37.101	41.4177
37.192	41.4442
37.284	41.4687
37.377	41.452
37.469	41.4226
37.561	41.403
37.652	41.3854
37.744	41.2678
37.836	40.818
37.928	39.6204
38.021	36.8647
38.113	31.7079
38.204	24.7205
38.296	16.0818
38.388	6.70614
38.48	2.56858
38.573	0.87514
38.664	0.62426
38.756	0.4508
38.848	0.2842
38.94	0.21952
39.032	0.1323
39.123	0.1078
39.216	0.15484
39.308	0.18326
39.4	0.21854
39.492	0.15582
39.584	0.1421
39.675	0.21364
39.768	0.17444
39.86	0.15092
39.952	0.15778
40.044	0.14014
40.135	0.12446
40.227	0.12544
40.32	0.09604
40.412	0.08624
40.504	0.1078
40.595	0.12446
40.687	0.11074
40.779	0.12838
40.871	0.15092
40.964	0.1519
41.055	0.1813
41.147	0.4753
41.239	1.43668
41.331	5.53994
41.423	13.0428
41.516	20.5565
41.607	27.3116
41.699	32.8653
41.791	37.0793
41.883	39.9409
41.975	41.8293
42.066	42.8436
42.159	42.9358
42.251	42.6721
42.343	42.3556
42.435	42.2586
42.526	42.239
42.618	42.1821
42.711	42.1214
42.803	42.0988
42.895	42.0773
42.987	42.0136
43.078	41.9803
43.17	41.9597
43.262	41.9371
43.355	41.9107
43.447	41.8293
43.538	41.7313
43.63	41.7
43.722	41.6892
43.814	41.6794
43.907	41.6608
43.999	41.6823
44.09	41.6765
44.182	41.6892
44.274	41.7852
44.366	42.0498
44.459	42.2968
44.55	42.3399
44.642	42.2919
44.734	42.2321
44.826	42.1861
44.918	42.1586
45.009	42.1047
45.102	42.0685
45.194	42.0606
45.286	42.042
45.378	41.9264
45.47	41.7304
45.561	41.1198
45.654	39.5636
45.746	37.0254
45.838	32.7075
45.93	24.3579
46.021	13.0752
46.113	3.67108
46.205	0.91728
46.298	0.7889
46.39	0.4263
46.481	0.31556
46.573	0.2156
46.665	0.1225
46.757	0.14014
46.85	0.1274
46.942	0.16366
47.033	0.20874
47.125	0.196
47.217	0.1666
47.309	0.18914
47.401	0.2009
47.493	0.18032
47.585	0.15876
47.677	0.15288
47.769	0.15778
47.861	0.15778
47.952	0.14014
48.045	0.13034
48.137	0.11858
48.229	0.1274
48.321	0.17542
48.413	0.35378
48.504	0.9947
48.596	4.5913
48.689	12.7292
48.781	19.5196
48.873	24.7744
48.964	28.7071
49.056	31.6207
49.148	33.907
49.241	35.3604
49.333	36.8117
49.424	38.8315
49.516	40.7807
49.608	42.0263
49.7	42.5095
49.793	42.5046
49.885	42.3135
49.976	42.1674
50.068	42.0636
50.16	41.991
50.252	42.0097
50.344	42.0371
50.436	42.0714
50.528	42.0077
50.62	41.9205
50.712	41.8744
50.804	41.8793
50.895	41.8823
50.988	41.8342
51.08	41.797
51.172	41.7852
51.264	41.7421
51.356	41.6578
51.447	41.5834
51.539	41.5324
51.632	41.5451
51.724	41.5598
51.816	41.554
51.907	41.5696
51.999	41.6618
52.091	41.701
52.184	41.6667
52.276	41.6716
52.367	41.7313
52.459	41.7892
52.551	41.8146
52.643	41.8734
52.736	41.992
52.828	41.9469
52.919	41.0424
53.011	38.0024
53.103	33.2455
53.195	25.3977
53.287	14.1757
53.379	6.48858
53.471	2.28242
53.563	0.64778
53.655	0.70854
53.747	0.21756
53.838	0.19894
53.931	0.16758
54.023	0.10388
54.115	0.0735
54.207	0.12152
54.299	0.14994
54.39	0.14014
54.482	0.04018
54.575	0
54.667	0.1127
54.759	0.16856
54.85	0.1519
54.942	0.1568
55.034	0.1666
55.127	0.17444
55.219	0.19306
55.31	0.19012
55.402	0.16758
55.494	0.17052
55.586	0.14994
55.678	0.15092
55.771	0.16268
55.862	0.15288
55.954	0.12936
56.046	0.1323
56.138	0.14308
56.23	0.1421
56.322	0.14406
56.414	0.14994
56.506	0.1617
56.598	0.15582
56.69	0.14798
56.782	0.13622
56.873	0.22834
56.966	0.83888
57.058	4.43744
57.15	13.9336
57.242	22.3626
57.333	28.1476
57.425	33.1044
57.518	37.3507
57.61	40.7817
57.702	42.8172
57.793	43.2209
57.885	43.0955
57.977	42.9965
58.07	42.9083
58.162	42.8681
58.254	42.8123
58.345	42.7682
58.437	42.6241
58.529	42.4908
58.621	42.3948
58.714	42.3605
58.805	42.3164
58.897	42.2253
58.989	42.1488
59.081	42.1273
59.173	42.0959
59.266	42.0371
59.357	41.9695
59.449	41.8921
59.541	41.7911
59.633	41.7019
59.725	41.6725
59.816	41.6539
59.909	41.6284
60.001	41.6343
60.093	41.697
60.185	41.9156
60.277	42.2635
60.368	42.4781
60.461	42.5193
60.553	42.3772
60.645	41.9509
60.737	41.0267
60.828	38.9962
60.92	35.2996
61.012	30.085
61.105	21.264
61.197	10.8074
61.288	4.16892
61.38	0.97706
61.472	0.88592
61.564	0.50666
61.657	0.2744
61.749	0.1715
61.84	0.16268
61.932	0.20482
62.024	0.15092
62.116	0.15876
62.209	0.1862
62.3	0.2058
62.392	0.19306
62.484	0.18816
62.576	0.1813
62.668	0.16562
62.76	0.1519
62.852	0.15582
62.944	0.17248
63.036	0.16856
63.128	0.18914
63.22	0.1617
63.311	0.1715
63.404	0.18816
63.496	0.16954
63.588	0.17934
63.68	0.19012
63.771	0.1715
63.863	0.18228
63.955	0.1617
64.048	0.14994
64.14	0.17248
64.232	0.20776
64.323	0.48216
64.415	1.68266
64.507	6.74142
64.6	15.3497
64.692	23.3916
64.783	29.6646
64.875	34.495
64.967	37.9084
65.059	40.2692
65.152	41.9479
65.243	42.924
65.335	43.1984
65.427	43.1043
65.519	42.9475
65.611	42.825
65.703	42.6878
65.795	42.581
65.887	42.485
65.979	42.3899
66.071	42.2988
66.163	42.2341
66.254	42.1714
66.347	42.1263
66.439	42.0832
66.531	42.0038
66.623	41.9362
66.715	41.9273
66.806	41.9313
66.898	41.9146
66.991	41.9077
67.083	41.8666
67.175	41.8186
67.266	41.7607
67.358	41.6882
67.45	41.6265
67.543	41.5951
67.635	41.5432
67.726	41.4795
67.818	41.4638
67.91	41.4932
68.002	41.4932
68.094	41.4903
68.187	41.5079
68.278	41.552
68.37	41.6951
68.462	41.8382
68.554	41.9234
68.646	41.896
68.738	41.7127
68.83	40.9228
68.922	38.4581
69.014	33.4229
69.106	22.7154
69.198	9.065
69.289	3.19284
69.382	0.7742
69.474	0.64484
69.566	0.6958
69.658	0.3724
69.749	0.32046
69.841	0.21952
69.934	0.27146
70.026	0.29988
70.118	0.2842
70.209	0.28518
70.301	0.27538
70.393	0.29694
70.486	0.30576
70.578	0.26264
70.67	0.2254
70.761	0.17052
70.853	0.26166
70.945	0.31066
71.037	0.24794
71.13	0.26558
71.221	0.2548
71.313	0.29694
71.405	0.29792
71.497	0.30576
71.589	0.27048
71.682	0.20384
71.773	0.13328
71.865	0.13034
71.957	0.1372
72.049	0.14112
72.141	0.18816
72.232	0.51842
72.325	2.37748
72.417	9.4766
72.509	18.9052
72.601	25.9994
72.692	30.9807
72.784	34.5274
72.877	37.2753
72.969	39.2323
73.061	40.4505
73.152	41.2717
73.244	41.9763
73.336	42.3027
73.428	42.4301
73.521	42.2752
73.613	42.1576
73.704	42.1253
73.796	42.043
73.888	41.9009
73.98	41.7519
74.073	41.6706
74.164	41.552
74.256	41.4707
74.348	41.4158
74.44	41.3883
74.532	41.3472
74.625	41.2727
74.716	41.16
74.808	41.0708
74.9	40.9787
74.992	40.8562
75.084	40.816
75.175	40.8092
75.268	40.8239
75.36	40.8582
75.452	40.9679
75.544	41.1002
75.635	41.1531
75.727	41.1561
75.82	41.0973
75.912	41.0463
76.004	41.0228
76.096	41.0228
76.187	40.9856
76.279	40.9297
76.371	40.8915
76.464	40.7788
76.556	40.3094
76.647	38.8207
76.739	35.5769
76.831	29.2344
76.923	18.3711
77.016	7.19124
77.108	2.5627
77.199	1.02312
77.291	0.79674
77.383	0.46746
77.475	0.3822
77.568	0.30478
77.659	0.19208
77.751	0.13426
77.843	0.1127
77.935	0.17346
78.027	0.23324
78.119	0.21756
78.211	0.2205
78.303	0.21462
78.395	0.21462
78.487	0.20188
78.579	0.22148
78.67	0.23618
78.763	0.245
78.855	0.2058
78.947	0.20482
79.039	0.22442
79.13	0.21266
79.222	0.22638
79.314	0.32634
79.407	0.55762
79.499	1.26126
79.591	4.27476
79.682	9.77648
79.774	15.4056
79.866	21.1837
79.959	26.0641
80.051	29.8253
80.142	32.8731
80.234	35.3368
80.326	37.3586
80.418	39.0863
80.51	40.4446
80.603	41.3031
80.694	41.7725
80.786	41.9558
80.878	41.9273
80.97	41.844
81.062	41.7108
81.154	41.6647
81.246	41.6284
81.338	41.5442
81.43	41.3981
81.522	41.3423
81.613	41.354
81.705	41.3295
81.798	41.2492
81.89	41.1502
81.982	41.0973
82.074	41.0777
82.165	41.0326
82.257	40.9914
82.35	40.9895
82.442	40.9856
82.534	40.9777
82.625	40.8974
82.717	40.7425
82.809	40.672
82.902	40.7092
82.994	40.8013
83.086	40.8905
83.177	40.8689
83.269	40.8288
83.361	40.7749
83.453	40.7533
83.546	40.721
83.637	40.4025
83.729	38.8629
83.821	35.5181
83.913	30.0233
84.005	19.1825
84.097	5.81042
84.189	1.91884
84.281	0.5194
84.373	0.2107
84.465	0.46256
84.557	0.27734
84.648	0.20678
84.741	0.12642
84.833	0.1568
84.925	0.18032
85.017	0.16366
85.108	0.17934
85.2	0.17052
85.293	0.16562
85.385	0.14504
85.477	0.12838
85.569	0.14504
85.66	0.14994
85.752	0.16072
85.844	0.14308
85.937	0.13524
86.029	0.1274
86.12	0.15288
86.212	0.24402
86.304	0.47628
86.396	1.61014
86.489	6.20536
86.581	13.7494
86.672	20.09
86.764	25.1105
86.856	29.0335
86.948	32.1068
87.041	34.7008
87.132	37.0675
87.224	38.9403
87.316	40.2153
87.408	41.0238
87.5	41.5373
87.592	41.7519
87.684	42.0106
87.776	42.1655
87.868	42.0322
87.96	41.8627
88.052	41.6804
88.143	41.5461
88.236	41.453
88.328	41.3511
88.42	41.2952
88.512	41.306
88.603	41.2747
88.695	41.1747
88.787	41.0816
88.88	41.0473
88.972	40.9807
89.064	40.9366
89.155	40.8954
89.247	40.8337
89.339	40.7425
89.432	40.6612
89.524	40.6132
89.615	40.57
89.707	40.525
89.799	40.4956
89.891	40.4603
89.984	40.4397
90.076	40.3486
90.167	40.2515
90.259	40.229
90.351	40.2006
90.443	40.1643
90.535	40.1388
90.627	40.0849
90.719	39.7635
90.811	37.9142
90.903	32.5095
90.995	21.8011
91.087	7.19418
91.179	1.18874
91.271	0.90454
91.363	0.34692
91.455	0.34496
91.547	0.17738
91.638	0.1862
91.73	0.2205
91.823	0.23912
91.915	0.2058
92.007	0.17738
92.099	0.21168
92.19	0.24108
92.282	0.27342
92.375	0.2548
92.467	0.23716
92.559	0.25774
92.65	0.23716
92.742	0.23912
92.834	0.22442
92.926	0.27342
93.019	0.24794
93.11	0.5194
93.202	1.32006
93.294	4.43058
93.386	11.1916
93.478	17.397
93.571	21.8481
93.662	25.579
93.754	28.8404
93.846	31.6667
93.938	34.0148
94.03	35.8435
94.121	37.3517
94.214	38.6933
94.306	39.5989
94.398	39.7292
94.49	39.5332
94.582	39.4381
94.673	39.4019
94.766	39.5028
94.858	39.7792
94.95	40.0614
95.042	40.1388
95.133	40.1281
95.225	40.0252
95.318	39.9409
95.41	39.8782
95.502	39.8488
95.594	39.786
95.685	39.7331
95.777	39.837
95.869	39.986
95.962	39.985
96.054	39.9477
96.145	39.8831
96.237	39.8213
96.329	39.8233
96.421	39.8537
96.514	39.837
96.606	39.8184
96.697	39.8086
96.789	39.8056
96.881	39.7821
96.973	39.7057
97.065	39.6038
97.157	39.5244
97.249	39.4283
97.341	39.396
97.433	39.3862
97.525	39.3764
97.616	39.3343
97.709	39.1098
97.801	38.2553
97.893	35.282
97.985	29.5421
98.077	20.9818
98.168	10.1165
98.26	3.75046
98.353	1.34946
98.445	0.55566
98.537	0.38808
98.628	0.20776
98.72	0.10976
98.812	0.13916
98.905	0.23128
98.997	0.245
99.089	0.17052
99.18	0.19894
99.272	0.19012
99.364	0.20286
99.457	0.2009
99.549	0.19502
99.64	0.18816
99.732	0.17934
99.824	0.17738
99.916	0.17346
100.008	0.17346
100.101	0.2058
100.192	0.22638
100.284	0.2254
100.376	0.2205
100.468	0.29106
100.56	0.65268
100.652	2.03154
100.744	6.7522
100.836	13.1614
100.928	18.3299
101.02	22.8918
101.111	27.0784
101.203	30.0586
101.296	32.6262
101.388	34.7136
101.48	36.2492
101.572	37.3841
101.663	38.1935
101.755	39.0069
101.848	39.7635
101.94	40.3192
102.032	40.6504
102.123	40.7582
102.215	40.668
102.307	40.6377
102.4	40.6651
102.492	40.768
102.584	40.8052
102.675	40.6778
102.767	40.5348
102.859	40.4564
102.951	40.476
103.044	40.4887
103.135	40.4613
103.227	40.3211
103.319	40.1741
103.411	40.1045
103.503	40.132
103.596	40.2692
103.687	40.4691
103.779	40.6612
103.871	40.4299
103.963	40.0252
104.055	39.9428
104.146	39.9183
104.239	39.8125
104.331	39.7664
104.423	39.8497
104.515	39.9458
104.607	39.8644
104.698	39.8399
104.791	39.8586
104.883	39.8292
104.975	39.7772
105.067	39.7125
105.158	39.6087
105.25	39.6077
105.342	39.6626
105.435	39.6155
105.527	39.1098
105.619	37.9152
105.71	35.3055
105.802	30.1879
105.894	22.3009
105.987	13.6592
106.079	7.00994
106.17	2.646
106.262	1.23578
106.354	0.85064
106.446	0.36162
106.539	0.27734
106.63	0.15386
106.722	0.07644
106.814	0
106.906	0
106.998	0.06664
107.09	0.11662
107.182	0.12446
107.274	0.12838
107.366	0.1274
107.458	0.11466
107.55	0.12446
107.641	0.14602
107.734	0.14504
107.826	0.13328
107.918	0.1323
108.01	0.12152
108.102	0.13524
108.193	0.14994
108.285	0.14798
108.378	0.14602
108.47	0.14014
108.562	0.1176
108.653	0.09604
108.745	0.12446
108.837	0.40474
108.93	1.96196
109.022	9.04834
109.114	20.2096
109.205	27.2273
109.297	30.8602
109.389	33.2289
109.481	35.2418
109.574	37.0469
109.665	38.6326
109.757	39.9213
109.849	40.8219
109.941	41.2952
110.033	41.3491
110.126	41.2443
110.217	41.1433
110.309	41.0179
110.401	40.9209
110.493	40.8444
110.585	40.7141
110.676	40.5887
110.769	40.5132
110.861	40.4809
110.953	40.5093
111.045	40.572
111.137	40.572
111.228	40.5602
111.321	40.5201
111.413	40.4407
111.505	40.3593
111.597	40.2662
111.688	40.2221
111.78	40.1937
111.873	40.0879
111.965	39.9967
112.057	40.0996
112.149	40.473
112.24	40.6994
112.332	40.6171
112.424	40.5171
112.517	40.4132
112.609	40.3152
112.7	40.2947
112.792	40.2927
112.884	40.277
112.976	40.2506
113.069	40.2417
113.161	40.2231
113.252	40.1967
113.344	40.1937
113.436	40.1869
113.528	40.1477
113.62	40.0889
113.712	39.7762
113.804	39.003
113.896	37.8427
113.988	34.7694
114.08	28.6532
114.171	20.7731
114.264	10.241
114.356	2.9106
114.448	1.2887
114.54	0.3283
114.632	0.39886
114.723	0.25382
114.816	0.0686
114.908	0.10878
115	0.09016
115.092	0.08624
115.183	0.1274
115.275	0.1323
115.367	0.1372
115.46	0.09702
115.552	0.11074
115.644	0.10976
115.735	0.11956
115.827	0.13034
115.919	0.1127
116.012	0.12642
116.104	0.29204
116.195	0.61446
116.287	1.59348
116.379	5.21948
116.471	11.1926
116.563	16.0054
116.655	19.2658
116.747	21.8569
116.839	24.2844
116.931	26.2366
117.023	27.6938
117.115	29.3157
117.207	30.9229
117.299	32.1959
117.391	32.7869
117.483	33.5562
117.575	34.5901
117.666	35.3172
117.758	35.6299
117.851	35.7994
117.943	35.8974
118.035	36.0042
118.127	36.5089
118.218	37.2018
118.31	37.5673
118.403	37.4615
118.495	37.2498
118.587	37.1273
118.678	37.0009
118.77	36.8833
118.862	36.8215
118.955	36.7608
119.047	36.6804
119.138	36.5912
119.23	36.5471
119.322	36.4844
119.414	36.4384
119.506	36.3805
119.599	36.3364
119.69	36.2659
119.782	36.2051
119.874	36.1336
119.966	36.0679
120.058	36.0356
120.15	35.9787
120.242	35.9268
120.334	35.8935
120.426	35.8553
120.518	35.8268
120.61	35.819
120.701	35.7788
120.794	35.7337
120.886	35.7151
120.978	35.6867
121.07	35.6749
121.161	35.7024
121.253	35.6769
121.346	35.6279
121.438	35.5965
121.53	35.4917
121.621	35.0634
121.713	34.1579
121.805	32.5037
121.897	29.2853
121.99	25.0792
122.082	19.6784
122.173	11.8796
122.265	6.0711
122.357	2.2981
122.449	0.88886
122.542	0.70854
122.633	0.37632
122.725	0.2695
122.817	0.28126
122.909	0.18718
123.001	0.21266
123.094	0.21266
123.185	0.22932
123.277	0.23716
123.369	0.22736
123.461	0.23716
123.553	0.2401
123.644	0.2548
123.737	0.2597
123.829	0.27342
123.921	0.29106
124.013	0.29008
124.104	0.28224
124.196	0.27832
124.289	0.27832
124.381	0.33908
124.473	0.57722
124.565	1.96196
124.656	7.12068
124.748	13.3143
124.84	17.347
124.933	21.1023
125.025	24.8028
125.116	27.8555
125.208	30.4888
125.3	32.9388
125.392	35.0938
125.485	36.702
125.577	37.7996
125.668	39.1931
125.76	40.277
125.852	40.4711
125.944	40.1457
126.036	39.9595
126.128	39.8468
126.22	39.74
126.312	39.6753
126.404	39.6586
126.496	39.5303
126.587	39.4352
126.68	39.3666
126.772	39.3274
126.864	39.3578
126.956	39.4283
127.048	39.5165
127.139	39.5597
127.232	39.542
127.324	39.4577
127.416	39.4029
127.508	39.3735
127.599	39.3029
127.691	39.2598
127.783	39.1951
127.876	39.1226
127.968	39.0785
128.059	39.0608
128.151	39.0334
128.243	39.0011
128.335	38.9599
128.428	38.8472
128.52	38.7904
128.611	38.7149
128.703	38.6002
128.795	38.514
128.887	38.4611
128.979	38.3807
129.071	38.2857
129.163	38.269
129.255	38.2396
129.347	38.169
129.439	38.0171
129.53	37.9387
129.623	37.9348
129.715	37.9525
129.807	38.0024
129.899	38.2131
129.991	38.2994
130.082	37.9583
130.174	37.1479
130.267	36.0718
130.359	33.6356
130.451	29.6068
130.542	24.6568
130.634	16.5434
130.726	9.85978
130.819	6.0368
130.911	2.3863
131.003	1.40532
131.094	0.76832
131.186	0.56252
131.278	0.31164
131.371	0.24598
131.463	0.2254
131.554	0.2058
131.646	0.2107
131.738	0.21364
131.83	0.2254
131.922	0.22932
132.015	0.21364
132.106	0.22442
132.198	0.20776
132.29	0.2254
132.382	0.23128
132.474	0.23814
132.566	0.2107
132.658	0.19796
132.75	0.2303
132.842	0.23716
132.934	0.245
133.025	0.4214
133.117	0.9653
133.21	4.00624
133.302	11.318
133.394	18.3123
133.486	23.8993
133.577	28.5993
133.669	32.4556
133.762	35.6994
133.854	38.1837
133.946	39.9046
134.037	40.7827
134.129	40.9317
134.221	40.7807
134.313	40.5632
134.406	40.3966
134.498	40.2417
134.589	40.1045
134.681	40.0193
134.773	39.8635
134.865	39.7292
134.958	39.6234
135.049	39.4666
135.141	39.3676
135.233	39.2813
135.325	39.1843
135.417	39.1226
135.508	39.0579
135.601	39.0324
135.693	39.0295
135.785	38.9873
135.877	38.9521
135.969	38.9246
136.06	38.8501
136.153	38.6992
136.245	38.6051
136.337	38.5424
136.429	38.4513
136.52	38.4003
136.612	38.3258
136.705	38.1847
136.797	38.0828
136.889	38.0122
136.981	37.8692
137.072	37.7133
137.164	37.5977
137.256	37.5056
137.349	37.4654
137.441	37.4781
137.532	37.5663
137.624	37.7427
137.716	37.9936
137.808	38.122
137.901	37.8897
137.993	37.0558
138.084	35.3819
138.176	31.9803
138.268	26.36
138.36	19.5314
138.452	10.1116
138.544	4.20126
138.636	1.73264
138.728	0.59388
138.82	0.79282
138.912	0.28812
139.004	0.1176
139.096	0.11662
139.188	0.17052
139.28	0.17934
139.372	0.17738
139.464	0.19012
139.555	0.21756
139.648	0.19698
139.74	0.1911
139.832	0.15876
139.924	0.14406
140.015	0.15092
140.107	0.19306
140.199	0.29008
140.292	0.25774
140.384	0.2009
140.476	0.2156
140.567	0.21266
140.659	0.21462
140.751	0.24598
140.844	0.23324
140.936	0.20678
141.027	0.2009
141.119	0.20874
141.211	0.196
141.303	0.2646
141.395	0.58408
141.488	2.40198
141.579	8.7661
141.671	16.7747
141.763	22.6272
141.855	27.5645
141.947	31.3453
142.039	34.1736
142.131	36.6246
142.223	38.5767
142.315	39.739
142.407	40.5504
142.499	40.9562
142.59	40.8229
142.683	40.5573
142.775	40.2682
142.867	40.0555
142.959	39.9321
143.05	39.7537
143.142	39.5312
143.235	39.3352
143.327	39.1775
143.419	39.0912
143.51	39.0334
143.602	38.9903
143.694	38.9619
143.787	38.8776
143.879	38.757
143.971	38.6835
144.062	38.6541
144.154	38.6051
144.246	38.5405
144.338	38.4915
144.431	38.4101
144.522	38.3405
144.614	38.3405
144.706	38.3209
144.798	38.2837
144.89	38.2288
144.983	38.1563
145.074	38.0524
145.166	37.9093
145.258	37.8486
145.35	37.8349
145.442	37.7859
145.533	37.78
145.626	37.8398
145.718	38.0505
145.81	38.3543
145.902	38.3964
145.993	38.022
146.085	37.0009
146.178	34.6861
146.27	30.4574
146.362	24.2648
146.454	15.8152
146.545	8.00562
146.637	3.57504
146.729	0.9604
146.822	0.9163
146.914	0.43316
147.005	0.1813
147.097	0.20188
147.189	0.1764
147.281	0.08428
147.374	0.13132
147.466	0.12642
147.557	0.14112
147.649	0.12544
147.741	0.11466
147.833	0.10094
147.926	0.11368
148.017	0.13916
148.109	0.14308
148.201	0.14994
148.293	0.14896
148.385	0.14014
148.476	0.13132
148.569	0.12054
148.661	0.0882
148.753	0.08526
148.845	0.06762
148.937	0.06468
149.028	0.12054
149.121	0.10976
149.213	0.1274
149.305	0.14602
149.397	0.29792
149.488	0.88004
149.58	3.23694
149.672	9.4962
149.765	16.1504
149.857	21.2925
149.949	25.4232
150.04	28.7689
150.132	31.5589
150.224	33.8031
150.317	35.7631
150.409	37.3155
150.5	38.3807
150.592	38.7012
150.684	38.6375
150.776	38.6316
150.868	38.6551
150.96	38.9236
151.052	39.251
151.144	39.202
151.236	39.0138
151.328	38.8541
151.42	38.6306
151.512	38.4523
151.604	38.3386
151.696	38.2151
151.788	38.1289
151.88	38.0779
151.971	37.9858
152.064	37.9015
152.156	37.83
152.248	37.7457
152.34	37.6487
152.432	37.5477
152.523	37.4546
152.615	37.389
152.708	37.3556
152.8	37.3066
152.892	37.2694
152.983	37.2243
153.075	37.2126
153.167	37.2331
153.26	37.1567
153.352	37.0773
153.443	37.0597
153.535	37.0479
153.627	36.9725
153.719	36.8019
153.811	36.601
153.904	36.3982
153.995	36.0738
154.087	35.2428
154.179	33.1044
154.271	29.7802
154.363	24.6225
154.455	16.1141
154.547	7.93016
154.639	3.5084
154.731	0.90062
154.823	0.77518
154.915	0.49294
155.006	0.21756
155.099	0.2842
155.191	0.3136
155.283	0.26166
155.375	0.25382
155.466	0.25088
155.558	0.22932
155.651	0.2058
155.743	0.17542
155.835	0.14504
155.926	0.11956
156.018	0.09114
156.11	0.0784
156.203	0.11466
156.295	0.13524
156.387	0.15876
156.478	0.14994
156.57	0.10192
156.662	0.15484
156.754	0.36064
156.847	0.62916
156.938	1.09368
157.03	1.02214
157.122	0.1176
157.214	0.39102
157.306	0.99372
157.398	1.22892
157.49	4.41588
157.582	10.2645
157.674	15.7035
157.766	20.6976
157.858	25.5368
157.949	29.5735
158.042	32.8104
158.134	35.7661
158.226	38.6257
158.318	40.4858
158.409	40.8219
158.501	40.5887
158.594	40.4848
158.686	40.3221
158.778	40.2006
158.869	40.1153
158.961	40.0065
159.053	39.9017
159.145	39.7851
159.238	39.6684
159.33	39.5793
159.421	39.4842
159.513	39.4234
159.605	39.3323
159.697	39.2363
159.79	39.1324
159.881	39.0501
159.973	38.9834
160.065	38.9197
160.157	38.8884
160.249	38.8266
160.34	38.7727
160.433	38.7296
160.525	38.6649
160.617	38.6414
160.709	38.6326
160.801	38.61
160.892	38.5493
160.985	38.466
161.077	38.3993
161.169	38.3641
161.261	38.3347
161.352	38.3092
161.444	38.2435
161.537	38.12
161.629	37.8427
161.721	37.239
161.813	35.8817
161.904	32.7585
161.996	28.0819
162.088	21.9089
162.181	12.5166
162.273	6.22986
162.364	2.56564
162.456	0.8673
162.548	0.94962
162.64	0.26362
162.733	0.14504
162.824	0.14602
162.916	0.0441
163.008	0.13524
163.1	0.16562
163.192	0.20482
163.284	0.21168
163.376	0.21756
163.468	0.22246
163.56	0.23912
163.652	0.22442
163.744	0.2107
163.835	0.2156
163.928	0.2205
164.02	0.21658
164.112	0.22148
164.204	0.22344
164.295	0.16562
164.387	0.03724
164.48	0
164.572	0
164.664	0
164.756	0
164.847	0
164.939	0
165.031	0
165.124	0
165.216	0
165.307	0
165.399	0
165.491	0.1029
165.583	0.25578
165.676	1.0584
165.767	5.65362
165.859	15.0989
165.951	23.4044
166.043	29.2422
166.135	33.4102
166.227	36.6128
166.319	39.0795
166.411	40.4642
166.503	40.6847
166.595	40.3868
166.687	40.1437
166.778	39.9879
166.871	39.8556
166.963	39.6694
167.055	39.4773
167.147	39.2862
167.239	39.1089
167.33	39.0167
167.422	38.9374
167.515	38.8443
167.607	38.6884
167.699	38.5248
167.79	38.4581
167.882	38.3993
167.974	38.319
168.067	38.2592
168.159	38.1916
168.251	38.1259
168.342	38.0661
168.434	37.9946
168.526	37.9074
168.619	37.8437
168.711	37.7702
168.802	37.6751
168.894	37.5928
168.986	37.5516
169.078	37.4781
169.17	37.3694
169.262	37.2361
169.354	37.1675
169.446	37.1185
169.538	37.0822
169.63	37.0371
169.722	37.0156
169.814	36.9401
169.906	36.8578
169.998	36.7667
170.09	36.6902
170.182	36.6608
170.273	36.6491
170.365	36.6226
170.458	36.5942
170.55	36.5471
170.642	36.503
170.733	36.4599
170.825	36.3982
170.917	36.3805
171.01	36.3511
171.102	36.2953
171.194	36.262
171.285	36.209
171.377	36.1404
171.469	36.1542
171.561	36.1816
171.654	36.1404
171.745	36.0787
171.837	36.0385
171.929	36.0483
172.021	35.9268
172.113	35.2682
172.205	33.6561
172.297	30.8749
172.389	27.1254
172.481	22.2627
172.573	15.6222
172.665	9.16692
172.756	3.81514
172.849	1.22696
172.941	0.8673
173.033	0.32536
173.125	0.0931
173.216	0.07154
173.308	0.04704
173.401	0.06272
173.493	0.049
173.585	0.04508
173.676	0.0392
173.768	0.04214
173.86	0.03724
173.953	0.03332
174.045	0.02156
174.137	0.01274
174.228	0.01764
174.32	0.03332
174.412	0.03136
174.504	0.02548
174.597	0.02352
174.688	0.03234
174.78	0.06174
174.872	0.09898
174.964	0.12838
175.056	0.15582
175.148	0.47726
175.24	2.00802
175.332	7.81452
175.424	16.8707
175.516	23.864
175.608	28.8267
175.699	32.7614
175.792	35.7514
175.884	37.7555
175.976	39.1765
176.068	39.8595
176.159	39.9252
176.251	39.8595
176.344	39.7076
176.436	39.4391
176.528	39.2451
176.62	39.1265
176.711	39.0314
176.803	38.9227
176.896	38.8305
176.988	38.7727
177.08	38.7169
177.171	38.708
177.263	38.6679
177.355	38.612
177.447	38.5571
177.54	38.4915
177.631	38.3837
177.723	38.2249
177.815	38.1298
177.907	38.0475
177.999	37.9848
178.092	37.9201
178.183	37.8505
178.275	37.777
178.367	37.73
178.459	37.6653
178.551	37.63
178.642	37.6565
178.735	37.6732
178.827	37.6144
178.919	37.5369
179.011	37.5026
179.103	37.5507
179.194	37.5918
179.287	37.6918
179.379	37.8701
179.471	37.9652
179.563	38.0015
179.654	38.1298
179.746	38.4699
179.838	38.709
179.931	38.7276
180.023	38.6914
180.114	38.4954
180.206	38.2229
180.298	37.7133
180.39	36.0405
180.483	32.5409
180.575	27.6634
180.666	19.4207
180.758	10.0715
180.85	5.10776
180.942	1.60034
181.035	0.91532
181.126	0.79576
181.218	0.39004
181.31	0.28126
181.402	0.21756
181.494	0.13132
181.585	0.17934
181.678	0.21266
181.77	0.21266
181.862	0.2058
181.954	0.15876
182.046	0.13818
182.137	0.16268
182.23	0.26068
182.322	0.22834
182.414	0.2744
182.506	0.28028
182.597	0.22344
182.689	0.2401
182.781	0.26656
182.874	0.14014
182.966	0.14994
183.058	0.18816
183.149	0.1421
183.241	0.1421
183.333	0.28028
183.426	0.80948
183.518	3.89158
183.609	11.9256
183.701	19.2492
183.793	23.8385
183.885	27.9427
183.977	31.5472
184.07	34.4715
184.161	36.6412
[truncated: 3,567 more rows]

## Sheet: S02-Right hand
Time/s	Force/N
0.4	0
0.492	0.01176
0.584	0.02842
0.675	0.0294
0.768	0.01274
0.86	0.01078
0.952	0
1.044	0
1.136	0.04704
1.227	0.3283
1.319	0.8281
1.412	0.99078
1.504	0.9702
1.596	0.9359
1.687	0.85456
1.779	0.53998
1.871	0.1372
1.964	0.15386
2.056	0.2303
2.147	0.8624
2.239	4.32572
2.331	13.6063
2.423	22.5625
2.515	28.5895
2.608	33.9325
2.699	38.659
2.791	42.6555
2.883	45.3907
2.975	46.5549
3.067	46.4304
3.159	46.1002
3.251	45.9326
3.343	45.7405
3.435	45.5916
3.527	45.3299
3.619	45.1447
3.71	45.0379
3.803	44.9526
3.895	44.9467
3.987	44.8693
4.079	44.8017
4.17	44.7341
4.262	44.6263
4.355	44.5341
4.447	44.4263
4.539	44.3587
4.631	44.3313
4.722	44.2793
4.814	44.3068
4.907	44.394
4.999	44.392
5.091	44.2588
5.182	44.0588
5.274	44.0196
5.366	43.9912
5.458	43.9638
5.551	43.8834
5.642	43.8021
5.734	43.8844
5.826	44.2509
5.918	44.588
6.01	42.9926
6.103	37.5467
6.194	27.0235
6.286	14.2688
6.378	5.97604
6.47	2.61268
6.562	2.1756
6.653	1.41022
6.746	1.3426
6.838	1.27988
6.93	1.2691
7.022	1.23382
7.114	1.24166
7.205	1.2593
7.298	1.26616
7.39	1.28184
7.482	1.28184
7.574	1.28674
7.665	1.29458
7.757	1.28086
7.849	1.26518
7.942	1.25636
8.034	1.26224
8.125	1.27596
8.217	1.26714
8.309	1.26126
8.401	1.26616
8.494	1.274
8.585	1.27008
8.677	1.27498
8.769	1.27302
8.861	1.26322
8.953	1.26224
9.046	1.3279
9.137	2.07858
9.229	6.62578
9.321	17.2637
9.413	26.5041
9.505	32.5693
9.596	37.6085
9.689	41.6392
9.781	44.4254
9.873	45.7493
9.965	46.0825
10.056	46.2335
10.148	46.1296
10.241	45.9336
10.333	45.9522
10.425	45.8856
10.517	45.7562
10.608	45.6357
10.7	45.5092
10.792	45.421
10.885	45.4426
10.977	45.4103
11.068	45.3083
11.16	45.2143
11.252	45.1613
11.344	45.0967
11.437	45.0036
11.528	44.9399
11.62	44.8732
11.712	44.7919
11.804	44.6586
11.896	44.5753
11.988	44.5263
12.08	44.4783
12.172	44.4352
12.264	44.4107
12.356	44.3754
12.448	44.3107
12.539	44.2274
12.632	44.2019
12.724	44.2088
12.816	44.199
12.908	44.2
12.999	44.196
13.091	44.1118
13.184	43.6051
13.276	41.7627
13.368	37.1351
13.459	27.244
13.551	12.4019
13.643	3.83572
13.735	2.12562
13.828	1.4847
13.92	1.3671
14.011	1.41218
14.103	1.48666
14.195	1.45432
14.287	1.44354
14.38	1.41316
14.471	1.41022
14.563	1.42296
14.655	1.421
14.747	1.40434
14.839	1.38768
14.93	1.38964
15.023	1.3818
15.115	1.35338
15.207	1.29556
15.299	1.22206
15.391	1.18678
15.482	1.1662
15.575	1.16228
15.667	1.16718
15.759	1.17894
15.851	1.18384
15.942	1.18482
16.034	1.24362
16.126	1.38964
16.219	1.97274
16.311	4.83924
16.402	13.0213
16.494	22.5116
16.586	29.6009
16.678	34.8978
16.771	38.7923
16.863	41.651
16.954	43.612
17.046	44.5155
17.138	44.6341
17.23	44.6851
17.323	44.6772
17.414	44.5488
17.506	44.396
17.598	44.2597
17.69	44.1421
17.782	44.0049
17.873	43.9197
17.966	43.8599
18.058	43.806
18.15	43.7227
18.242	43.6355
18.334	43.5679
18.425	43.4983
18.518	43.4522
18.61	43.3944
18.702	43.3748
18.794	43.3434
18.885	43.3101
18.977	43.2964
19.069	43.2435
19.162	43.1915
19.254	43.1553
19.345	43.1161
19.437	43.1024
19.529	43.0906
19.621	43.0779
19.714	43.1024
19.805	43.1288
19.897	43.1406
19.989	43.1484
20.081	43.1435
20.173	43.0955
20.265	43.0485
20.357	42.9965
20.449	42.9495
20.541	42.8936
20.633	42.8427
20.725	42.8221
20.816	42.7995
20.909	42.7809
21.001	42.7839
21.093	42.9348
21.185	43.2964
21.276	43.2405
21.368	41.4324
21.46	36.9636
21.553	29.5725
21.645	20.0155
21.737	10.5713
21.828	4.36296
21.92	2.26282
22.012	1.8718
22.105	1.31418
22.197	1.64346
22.288	1.4945
22.38	1.4798
22.472	1.6023
22.564	1.5484
22.657	1.61308
22.748	1.61406
22.84	1.6366
22.932	1.67678
23.024	1.65228
23.116	1.6464
23.208	1.617
23.3	1.60524
23.392	1.58564
23.484	1.58368
23.576	1.58858
23.668	1.62092
23.759	1.61406
23.852	1.63072
23.944	1.61994
24.036	2.2981
24.128	6.19262
24.219	14.1424
24.311	22.0627
24.403	28.8022
24.496	34.5401
24.588	39.0197
24.68	42.2409
24.771	44.5302
24.863	45.7474
24.955	45.8993
25.048	45.5876
25.14	45.1584
25.231	44.8703
25.323	44.7056
25.415	44.6557
25.507	44.6018
25.6	44.5332
25.691	44.4518
25.783	44.3421
25.875	44.2842
25.967	44.2362
26.059	44.147
26.151	44.0686
26.243	43.9677
26.335	43.8942
26.427	43.8472
26.519	43.8393
26.611	43.8501
26.702	43.8766
26.795	43.8413
26.887	43.7913
26.979	43.7364
27.071	43.6433
27.162	43.5796
27.254	43.5394
27.346	43.4973
27.439	43.5277
27.531	43.5796
27.623	43.5973
27.714	43.5708
27.806	43.5669
27.898	43.5992
27.991	43.6178
28.083	43.7668
28.174	43.9579
28.266	43.0857
28.358	39.2118
28.45	31.0435
28.542	18.9679
28.634	9.51678
28.726	4.02584
28.818	1.75616
28.91	2.0727
29.002	1.2054
29.093	1.3622
29.186	1.55134
29.278	1.34162
29.37	1.36024
29.462	1.37298
29.554	1.23088
29.645	1.28282
29.737	1.29066
29.83	1.25146
29.922	1.25048
30.014	1.2544
30.105	1.26028
30.197	1.24754
30.289	1.2348
30.382	1.22892
30.474	1.1907
30.565	1.0878
30.657	1.15738
30.749	1.08486
30.841	1.04076
30.934	1.05546
31.025	1.03586
31.117	1.05448
31.209	1.2495
31.301	2.35004
31.393	8.17908
31.485	18.4181
31.577	26.1797
31.669	32.0783
31.761	36.8127
31.853	40.3907
31.945	43.1102
32.036	44.6557
32.129	44.8987
32.221	44.5949
32.313	44.2558
32.405	43.9628
32.496	43.7501
32.588	43.5522
32.68	43.4169
32.773	43.3082
32.865	43.171
32.957	43.0269
33.048	42.9122
33.14	42.828
33.232	42.7574
33.325	42.6917
33.417	42.629
33.508	42.5673
33.6	42.5124
33.692	42.4467
33.784	42.3644
33.876	42.2948
33.968	42.2527
34.06	42.2174
34.152	42.1841
34.244	42.1106
34.336	42.0547
34.428	42.0204
34.52	41.9626
34.612	41.9107
34.704	41.8548
34.796	41.8068
34.888	41.7647
34.979	41.7382
35.072	41.7088
35.164	41.6539
35.256	41.6157
35.348	41.5883
35.439	41.5981
35.531	41.6921
35.623	41.8039
35.716	41.991
35.808	42.387
35.9	42.6702
35.991	42.7123
36.083	42.7633
36.175	42.8583
36.268	42.9152
36.36	42.8544
36.451	42.5908
36.543	41.0983
36.635	36.5697
36.727	28.6454
36.819	17.932
36.911	9.25512
37.003	3.8955
37.095	2.10308
37.187	2.17658
37.279	1.37102
37.37	1.82378
37.463	1.69834
37.555	1.52782
37.647	1.47882
37.739	1.37886
37.831	1.34554
37.922	1.32594
38.014	1.31908
38.107	1.2985
38.199	1.274
38.291	1.25734
38.382	1.24656
38.474	1.2446
38.566	1.27988
38.659	1.29556
38.751	1.27988
38.842	1.2642
38.934	1.24852
39.026	1.22696
39.118	1.22402
39.211	1.38964
39.302	2.92138
39.394	9.32764
39.486	18.4299
39.578	24.6323
39.67	29.4755
39.761	33.7071
39.854	37.2165
39.946	40.3809
40.038	42.7515
40.13	43.8491
40.222	43.9471
40.313	43.5502
40.406	43.122
40.498	42.9426
40.59	42.8926
40.682	42.7692
40.773	42.6271
40.865	42.5114
40.957	42.4595
41.05	42.3801
41.142	42.2498
41.233	42.1802
41.325	42.1008
41.417	42.1194
41.509	42.2507
41.602	42.3997
41.694	42.4242
41.785	42.337
41.877	42.2449
41.969	42.1665
42.061	42.1096
42.153	41.9538
42.245	41.8372
42.337	41.9812
42.429	42.4507
42.521	42.9103
42.613	43.1367
42.704	43.0681
42.797	42.9887
42.889	42.9407
42.981	42.7613
43.073	42.5947
43.165	42.6447
43.256	42.3821
43.348	39.5949
43.441	32.1479
43.533	21.7952
43.625	11.7531
43.716	4.7628
43.808	2.29418
43.9	1.86102
43.993	1.28184
44.085	1.34652
44.176	1.35044
44.268	1.2495
44.36	1.2642
44.452	1.27302
44.545	1.22892
44.636	1.24264
44.728	1.23872
44.82	1.21324
44.912	1.19658
45.004	1.17306
45.096	1.15444
45.188	1.14954
45.28	1.17698
45.372	1.1515
45.464	1.13876
45.556	1.1319
45.647	1.13386
45.74	1.1368
45.832	1.1417
45.924	1.1515
46.016	1.1515
46.107	1.24558
46.199	2.1609
46.291	6.44252
46.384	15.6281
46.476	23.0643
46.568	28.2426
46.659	32.8574
46.751	36.6285
46.843	39.5254
46.936	41.6745
47.028	42.973
47.119	43.3327
47.211	43.2347
47.303	42.9838
47.395	42.7643
47.488	42.6369
47.579	42.5487
47.671	42.5065
47.763	42.5232
47.855	42.6251
47.947	42.6035
48.039	42.482
48.131	42.3448
48.223	42.2498
48.315	42.2027
48.407	42.141
48.499	42.0783
48.59	42.0273
48.683	41.993
48.775	41.9499
48.867	41.9303
48.959	41.895
49.05	41.846
49.142	41.8225
49.234	41.7578
49.327	41.7157
49.419	41.65
49.511	41.6137
49.602	41.6255
49.694	41.6177
49.786	41.6098
49.879	41.6226
49.971	41.5843
50.062	41.3158
50.154	40.7719
50.246	38.9089
50.338	33.1073
50.43	22.1157
50.522	10.6781
50.614	4.40804
50.706	2.71656
50.798	2.35788
50.89	1.9747
50.981	1.96784
51.074	1.77576
51.166	1.65032
51.258	1.62876
51.35	1.58564
51.442	1.5925
51.533	1.56114
51.625	1.58858
51.718	1.59642
51.81	1.57976
51.902	1.50332
51.993	1.49352
52.085	1.4406
52.177	1.39454
52.27	1.34848
52.362	1.33182
52.453	1.3426
52.545	1.36318
52.637	1.33672
52.729	1.45334
52.822	1.56604
52.914	1.71696
53.005	1.78066
53.097	1.78066
53.189	1.83358
53.281	2.58426
53.373	6.73456
53.465	14.2188
53.557	20.6437
53.649	26.5629
53.741	31.8794
53.833	35.9415
53.924	39.0736
54.017	41.454
54.109	43.1367
54.201	44.051
54.293	44.2156
54.384	43.9618
54.476	43.4904
54.568	43.1474
54.661	42.9818
54.753	42.8623
54.845	42.7251
54.936	42.5712
55.028	42.335
55.12	42.139
55.213	42.041
55.305	41.9518
55.396	41.8734
55.488	41.8656
55.58	41.8646
55.672	41.8195
55.764	41.8068
55.856	41.7598
55.948	41.6647
56.04	41.6226
56.132	41.5853
56.224	41.5334
56.316	41.4971
56.408	41.5167
56.5	41.5197
56.592	41.5491
56.684	41.5804
56.776	41.5657
56.867	41.6431
56.96	41.7901
57.052	41.8774
57.144	41.8901
57.236	41.6588
57.328	40.9611
57.419	39.248
57.511	35.2457
57.604	28.8394
57.696	19.8303
57.788	10.0234
57.879	3.94156
57.971	2.3275
58.063	1.57388
58.156	1.04174
58.248	0.95158
58.339	0.9457
58.431	0.9702
58.523	0.92904
58.615	0.9261
58.707	0.93492
58.8	0.92022
58.891	0.89768
58.983	0.88788
59.075	0.87024
59.167	0.85848
59.259	0.8575
59.351	0.85848
59.443	0.86926
59.535	0.88004
59.627	0.88494
59.719	0.88102
59.81	0.86926
59.902	0.8722
59.995	0.88886
60.087	0.882
60.179	0.87612
60.271	0.88396
60.362	0.90062
60.454	0.99078
60.547	1.77772
60.639	5.96428
60.731	14.5628
60.822	21.0396
60.914	25.4447
61.006	29.2804
61.099	32.5458
61.191	35.3976
61.283	37.8554
61.374	39.8301
61.466	41.1992
61.558	41.9597
61.65	42.2253
61.743	42.1851
61.834	42.1498
61.926	42.1919
62.018	42.2439
62.11	42.2409
62.202	42.1616
62.295	41.993
62.386	41.8372
62.478	41.7304
62.57	41.6
62.662	41.4432
62.754	41.3413
62.845	41.2462
62.938	41.1845
63.03	41.1041
63.122	41.0012
63.214	40.9219
63.305	40.8954
63.397	40.9062
63.49	40.8611
63.582	40.8297
63.674	40.8366
63.766	40.766
63.857	40.6925
63.949	40.5975
64.041	40.4377
64.134	40.3819
64.226	40.4044
64.317	40.4397
64.409	40.4622
64.501	40.4495
64.593	40.4495
64.686	40.4593
64.778	40.4789
64.869	40.5034
64.961	40.5877
65.053	40.67
65.145	40.6524
65.238	39.9566
65.329	37.9015
65.421	34.1079
65.513	26.5678
65.605	16.2464
65.697	6.9972
65.788	2.64502
65.881	2.11484
65.973	1.32398
66.065	1.35338
66.157	1.26224
66.249	1.1907
66.34	1.18384
66.433	1.18188
66.525	1.1858
66.617	1.18678
66.709	1.17698
66.8	1.17796
66.892	1.17796
66.984	1.17796
67.077	1.1858
67.169	1.18286
67.261	1.17894
67.352	1.19168
67.444	1.1907
67.536	1.17894
67.629	1.1711
67.721	1.17306
67.812	1.176
67.904	1.18384
67.996	1.16326
68.088	1.13778
68.18	1.1858
68.272	1.66306
68.364	3.23694
68.456	7.97328
68.548	14.3472
68.64	19.0169
68.732	24.1021
68.824	29.4098
68.916	33.8267
69.008	36.9627
69.1	39.0648
69.192	40.525
69.283	41.4491
69.376	41.6843
69.468	41.4785
69.56	41.4383
69.652	41.5177
69.743	41.5059
69.835	41.3442
69.927	41.2943
70.02	41.3491
70.112	41.3942
70.204	41.3844
70.295	41.3433
70.387	41.2609
70.479	41.1326
70.572	40.9865
70.664	40.8337
70.755	40.7053
70.847	40.573
70.939	40.476
71.031	40.424
71.123	40.3819
71.216	40.327
71.307	40.2692
71.399	40.2163
71.491	40.181
71.583	40.1761
71.675	40.1594
71.767	40.1339
71.859	40.1545
71.951	40.4456
72.043	41.109
72.135	41.2786
72.226	40.6161
72.318	39.0344
72.411	35.4907
72.503	28.0652
72.595	18.6406
72.687	11.269
72.778	5.58796
72.87	3.16246
72.963	2.11484
73.055	1.50724
73.147	1.39258
73.238	1.23872
73.33	1.2152
73.422	1.1858
73.515	1.1613
73.607	1.12602
73.699	1.07506
73.79	1.02214
73.882	0.95354
73.974	0.86436
74.066	0.82614
74.159	0.86142
74.25	0.86534
74.342	0.79282
74.434	0.7448
74.526	0.77028
74.618	0.75362
74.71	0.76636
74.802	0.78792
74.894	0.77224
74.986	0.735
75.078	0.76146
75.17	0.79772
75.261	0.84084
75.354	0.8722
75.446	0.8722
75.538	0.88984
75.63	0.90356
75.721	0.96922
75.813	1.03782
75.906	1.0878
75.998	1.14464
76.09	1.12896
76.182	1.33182
76.273	2.3961
76.365	6.91586
76.457	14.3002
76.55	20.8279
76.642	27.6037
76.733	33.6483
76.825	38.3621
76.917	41.3442
77.009	43.021
77.102	43.5865
77.193	43.3513
77.285	43.07
77.377	42.8035
77.469	42.4693
77.561	42.093
77.654	41.8166
77.745	41.5883
77.837	41.3119
77.929	41.1502
78.021	41.0718
78.113	40.9023
78.204	40.7445
78.297	40.5857
78.389	40.4485
78.481	40.3241
78.573	40.2123
78.664	40.1036
78.756	40.0212
78.849	39.9693
78.941	39.8664
79.033	39.7478
79.125	39.6998
79.216	39.6155
79.308	39.5557
79.4	39.5195
79.493	39.4656
79.585	39.4156
79.676	39.3852
79.768	39.3431
79.86	39.2813
79.952	39.2078
80.045	39.151
80.137	39.0726
80.228	39.0275
80.32	38.9717
80.412	38.9207
80.504	38.9609
80.596	39.0148
80.688	39.0207
80.78	38.8854
80.872	38.2817
80.964	36.1375
81.056	33.0378
81.147	29.4715
81.24	23.0182
81.332	15.1116
81.424	8.33392
81.516	3.36826
81.608	2.41668
81.699	1.63464
81.792	1.47196
81.884	1.37396
81.976	1.2103
82.068	1.21422
82.159	1.1368
82.251	1.1466
82.343	1.17404
82.436	1.15738
82.528	1.12994
82.619	1.1025
82.711	1.09956
82.803	1.09662
82.895	1.1025
82.988	1.08976
83.08	1.07898
83.171	1.08878
83.263	1.0731
83.355	1.04664
83.447	1.05742
83.539	1.1858
83.631	1.31908
83.723	1.22696
83.815	1.38768
83.907	1.3818
83.999	1.35632
84.09	1.42688
84.183	1.41316
84.275	1.37004
84.367	1.29164
84.459	1.24068
84.551	1.22206
84.642	1.16914
84.734	1.16424
84.827	1.20736
84.919	1.56408
85.011	3.03114
85.102	8.77198
85.194	16.4748
85.286	22.5126
85.379	28.2289
85.471	32.7869
85.562	36.3805
85.654	39.5636
85.746	41.9156
85.838	42.8554
85.931	42.8564
86.023	42.7437
86.114	42.6467
86.206	42.5653
86.298	42.4105
86.39	42.1988
86.482	42.0979
86.574	41.9803
86.666	41.7607
86.758	41.6206
86.85	41.5402
86.942	41.4961
87.034	41.5461
87.126	41.7372
87.218	42.1635
87.31	42.5046
87.402	42.4673
87.494	42.3772
87.585	42.2145
87.677	42.0547
87.77	41.9185
87.862	41.7529
87.954	41.6206
88.045	41.5236
88.137	41.4315
88.229	41.3697
88.322	41.2854
88.414	41.1825
88.506	41.0659
88.597	40.9944
88.689	40.9562
88.781	40.8719
88.873	40.8621
88.966	41.1286
89.057	41.2021
89.149	40.8542
89.241	40.3437
89.333	39.4136
89.425	37.7986
89.517	35.2114
89.609	31.4286
89.701	25.8093
89.793	19.4491
89.885	14.11
89.977	8.22906
90.068	4.6697
90.161	2.63326
90.253	2.23048
90.345	1.8669
90.437	1.5582
90.528	1.4504
90.62	1.2838
90.713	1.22206
90.805	1.22402
90.897	1.22206
90.988	1.22598
91.08	1.22696
91.172	1.24362
91.265	1.26812
91.357	1.26714
91.449	1.22402
91.54	1.20442
91.632	1.19952
91.724	1.17306
91.816	1.1221
91.909	1.10936
92	1.19364
92.092	1.25636
92.184	1.32986
92.276	1.36122
92.368	1.34554
92.461	1.27988
92.552	1.18776
92.644	1.1172
92.736	1.07898
92.828	1.02802
92.92	1.00058
93.011	0.96236
93.104	0.92022
93.196	0.9065
93.288	0.87024
93.38	0.85554
93.471	0.86534
93.563	0.8722
93.656	0.87318
93.748	0.80654
93.84	0.80948
93.932	0.85064
94.023	1.15052
94.115	3.14972
94.208	10.7379
94.3	20.7231
94.392	27.6772
94.483	32.8055
94.575	37.4409
94.667	41.0238
94.759	42.9083
94.852	43.7394
94.944	44.2009
95.035	44.2245
95.127	44.0755
95.219	43.9138
95.311	43.6482
95.404	43.4101
95.495	43.2258
95.587	43.0877
95.679	42.9946
95.771	42.925
95.863	42.7907
95.954	42.6574
96.047	42.5585
96.139	42.4683
96.231	42.3203
96.323	42.238
96.415	42.1469
96.506	42.043
96.599	41.9587
96.691	41.9068
96.783	41.8431
96.875	41.7607
96.966	41.6598
97.058	41.553
97.15	41.4207
97.243	41.3305
97.335	41.1825
97.427	41.1335
97.518	41.1375
97.61	41.0816
97.702	41.0385
97.795	41.0199
97.887	41.0061
97.978	41.0179
98.07	41.0159
98.162	41.0101
98.254	40.9326
98.347	40.4583
98.438	38.6718
98.53	33.4788
98.622	24.303
98.714	13.9905
98.806	6.9335
98.897	3.26144
98.99	2.33436
99.082	1.81594
99.174	1.23774
99.266	1.2005
99.358	1.25832
99.449	1.17404
99.542	1.06624
99.634	1.06624
99.726	1.078
99.818	1.02312
99.909	1.0241
100.001	1.01332
100.093	1.0045
100.186	1.00254
100.278	1.00058
100.37	0.9947
100.461	0.98098
100.553	0.99078
100.645	0.9996
100.738	0.99372
100.83	0.98882
100.921	0.97706
101.013	0.99862
101.105	1.03978
101.197	1.24656
101.289	2.7783
101.381	9.5844
101.473	19.8881
101.565	26.9157
101.657	31.8706
101.749	35.9523
101.841	39.2647
101.933	41.7421
102.025	43.2729
102.117	43.8207
102.209	43.708
102.301	43.3924
102.392	43.1602
102.484	42.9946
102.577	42.8054
102.669	42.5212
102.761	42.3752
102.853	42.3948
102.944	42.3419
103.036	42.1714
103.129	41.848
103.221	41.6735
103.313	41.5785
103.404	41.4893
103.496	41.5069
103.588	41.5314
103.681	41.4883
103.773	41.4589
103.864	41.4893
103.956	41.4942
104.048	41.4422
104.14	41.356
104.232	41.2982
104.325	41.3923
104.416	41.5412
104.508	41.5883
104.6	41.648
104.692	41.6823
104.784	41.6872
104.876	41.6451
104.968	41.554
105.06	41.4569
105.152	41.3942
105.244	41.2355
105.336	40.4338
105.427	37.778
105.52	31.5482
105.612	20.0038
105.704	9.09538
105.796	3.83278
105.887	1.92276
105.979	1.5533
106.072	1.02312
106.164	0.7693
106.256	0.7056
106.347	0.67032
106.439	0.57526
106.531	0.54194
106.624	0.55468
106.716	0.52136
106.808	0.50862
106.899	0.50568
106.991	0.52038
107.083	0.50568
107.175	0.47922
107.268	0.44884
107.359	0.43512
107.451	0.45178
107.543	0.45766
107.635	0.4998
107.727	0.55664
107.82	0.58408
107.911	0.588
108.003	0.58702
108.095	0.53018
108.187	0.53018
108.279	1.30536
108.37	5.1744
108.463	14.506
108.555	22.7311
108.647	27.4429
108.739	31.2561
108.83	34.8684
108.922	38.3415
109.015	41.0375
109.107	42.4644
109.199	42.8044
109.291	42.5604
109.382	42.3468
109.474	42.1439
109.566	41.8636
109.659	41.6578
109.751	41.553
109.842	41.3952
109.934	41.2952
110.026	41.1963
110.118	41.0306
110.211	40.8797
110.303	40.6132
110.394	40.4916
110.486	40.4828
110.578	40.4221
110.67	40.3887
110.763	40.3133
110.854	40.2515
110.946	40.1771
111.038	40.0938
111.13	40.0428
111.222	39.9869
111.313	39.9085
111.406	39.8409
111.498	39.7919
111.59	39.7331
111.682	39.642
111.774	39.5381
111.865	39.4352
111.958	39.3215
112.05	39.2706
112.142	39.2363
112.234	39.0951
112.325	38.8482
112.417	38.0358
112.509	35.9307
112.602	31.9892
112.694	24.1776
112.786	13.3878
112.877	6.11618
112.969	2.55486
113.061	1.47588
113.154	0.36652
113.246	1.05252
113.337	1.16228
113.429	2.15698
113.521	2.23048
113.613	1.2005
113.705	1.07212
113.797	1.06134
113.889	1.0829
113.981	1.07408
114.073	1.07114
114.165	1.06624
114.257	1.09172
114.349	1.09956
114.441	1.10446
114.533	1.1319
114.625	1.15738
114.717	1.18678
114.808	1.1466
114.9	0.0098
114.993	1.13484
115.085	1.09074
115.177	1.30046
115.269	1.56898
115.36	3.18206
115.452	8.3496
115.545	14.8617
115.637	19.8264
115.729	24.4696
115.82	28.762
115.912	32.2302
116.004	34.7684
116.097	36.6922
116.189	38.3484
116.281	39.7586
116.372	40.9101
116.464	41.7627
116.556	42.191
116.648	42.0361
116.741	41.5363
116.832	41.1326
116.924	40.9032
117.016	40.6749
117.108	40.476
117.2	40.3211
117.292	40.229
117.384	40.0996
117.476	40.0163
117.568	39.9497
117.66	39.8654
117.752	39.7851
117.843	39.6812
117.936	39.5312
118.028	39.4391
118.12	39.394
118.212	39.3068
118.303	39.2323
118.395	39.1157
118.488	38.9952
118.58	38.9305
118.672	38.8296
118.763	38.6973
118.855	38.5787
118.947	38.4434
119.04	38.2896
119.132	38.1877
119.224	38.0985
119.315	37.9966
119.407	37.8897
119.499	37.7741
119.591	37.7075
119.684	37.6702
119.775	37.6222
119.867	37.5605
119.959	37.6095
120.051	37.6643
120.143	37.5487
120.235	36.9117
120.327	34.2902
120.419	28.5131
120.511	21.1994
120.603	13.6142
120.695	6.15244
120.786	2.77242
120.879	2.01978
120.971	1.38964
121.063	1.2985
121.155	1.2446
121.246	1.22206
121.338	1.17894
121.431	1.16522
121.523	1.1858
121.615	1.19364
121.706	1.1907
121.798	1.19756
121.89	1.2054
121.982	1.20148
122.075	1.18776
122.167	1.15444
122.258	1.15346
122.35	1.1711
122.442	1.17796
122.534	1.17796
122.627	1.17992
122.718	1.17502
122.81	1.16816
122.902	1.1711
122.994	1.1809
123.086	1.18776
123.177	1.32202
123.27	1.73656
123.362	2.9204
123.454	7.0903
123.546	13.1006
123.638	18.5122
123.729	24.6382
123.822	30.5642
123.914	35.4917
124.006	38.856
124.098	40.4701
124.189	40.9905
124.281	40.9748
124.374	40.6612
124.466	40.2319
124.558	40.083
124.649	39.9889
124.741	39.9183
124.833	39.7488
124.925	39.5048
125.018	39.4724
125.11	39.4979
125.201	39.4764
125.293	39.3735
125.385	39.2745
125.477	39.198
125.57	39.1314
125.661	39.0344
125.753	38.9619
125.845	38.8864
125.937	38.7776
126.029	38.66
126.12	38.5434
126.213	38.4189
126.305	38.318
126.397	38.2435
126.489	38.1367
126.581	38.0632
126.672	38.0034
126.765	37.9897
126.857	38.0318
126.949	38.1475
127.041	38.1318
127.132	37.6859
127.224	36.4834
127.316	33.7091
127.409	25.625
127.501	11.7041
127.593	4.3022
127.684	2.1854
127.776	1.34064
127.868	1.3279
127.961	1.03978
128.053	1.1564
128.144	1.05546
128.236	1.0045
128.328	1.00352
128.42	1.029
128.513	1.05154
128.604	1.03096
128.696	1.0388
128.788	0.99372
128.88	0.95844
128.972	1.00548
129.064	1.03684
129.156	1.0437
129.248	0.98294
129.34	0.94864
129.432	0.99176
129.524	1.04566
129.615	1.05644
129.708	1.00254
129.8	0.93198
129.892	0.96236
129.984	1.00352
130.075	1.00548
130.167	0.97216
130.259	0.94864
130.352	1.666
130.444	6.8404
130.536	18.4661
130.627	27.1342
130.719	32.0362
130.811	36.2188
130.904	39.2755
130.996	41.1208
131.087	42.1929
131.179	42.6271
131.271	42.5585
131.363	42.3723
131.456	42.3115
131.547	42.1606
131.639	41.8901
131.731	41.648
131.823	41.505
131.915	41.3099
132.007	41.2012
132.099	41.1473
132.191	40.9856
132.283	40.8954
132.375	40.8121
132.467	40.6729
132.558	40.5534
132.651	40.3936
132.743	40.3211
132.835	40.2594
132.927	40.1241
133.018	40.0007
133.11	39.8929
133.202	39.7831
133.295	39.7508
133.387	39.7135
133.479	39.6508
133.57	39.5783
133.662	39.4528
133.754	39.3382
133.847	39.2931
133.939	39.2372
134.03	39.1196
134.122	39.0403
134.214	39.1196
134.306	39.1912
134.398	38.7698
134.49	37.1822
134.582	33.9805
134.674	28.0015
134.766	18.8523
134.858	9.4178
134.95	3.22028
135.042	1.6072
135.134	1.57682
135.226	1.20736
135.318	1.19364
135.41	1.1466
135.501	1.15444
135.593	1.15836
135.686	1.1368
135.778	1.09858
135.87	1.08682
135.961	1.07506
136.053	1.09172
136.145	1.1074
136.238	1.0829
136.33	1.05742
136.422	1.05546
136.513	1.0878
136.605	1.1074
136.697	1.0927
136.79	1.07408
136.882	1.01234
136.973	0.96236
137.065	0.9212
137.157	0.88788
137.249	1.0094
137.341	1.67678
137.433	5.41254
137.525	14.21
137.617	22.1264
137.709	27.8398
137.801	32.3449
137.893	36.0454
137.985	38.9403
138.077	40.9405
138.169	42.2478
138.261	42.727
138.353	42.5232
138.444	42.3958
138.536	42.386
138.629	42.2272
138.721	42.0459
138.813	41.9332
138.904	41.7627
138.996	41.601
139.088	41.4609
139.181	41.3286
139.273	41.2227
139.365	41.1208
139.456	40.8905
139.548	40.623
139.64	40.5367
139.732	40.3985
139.825	40.279
139.916	40.2163
140.008	40.1134
140.1	40.0261
140.192	39.8321
140.284	39.7478
140.377	39.8027
140.468	39.8831
140.56	39.9389
140.652	39.9595
140.744	39.9321
140.836	39.8831
140.928	39.8978
141.02	39.9409
141.112	39.9468
141.204	39.8909
141.296	39.7106
141.387	39.3254
141.479	38.4562
141.572	36.0826
141.664	29.9498
141.756	17.5234
141.848	6.0417
141.939	2.95568
142.031	1.61896
142.124	1.54742
142.216	1.43864
142.308	1.38278
142.399	1.43178
142.491	1.47588
142.583	1.65522
142.675	1.63072
142.768	1.64052
142.859	1.60426
142.951	1.58956
143.043	1.5827
143.135	1.58662
143.227	1.56996
143.32	1.49548
143.411	1.45628
143.503	1.43472
143.595	1.39748
143.687	1.43766
143.779	1.5239
143.87	1.53958
143.963	1.40042
144.055	1.13778
144.147	0.95746
144.239	0.85946
144.33	1.08486
144.422	1.78458
144.515	4.12482
144.607	10.4429
144.699	17.001
144.791	22.5135
144.882	27.8565
144.974	32.338
145.067	35.9768
145.159	38.6914
145.251	40.2868
145.342	40.672
145.434	40.6073
145.526	40.6837
145.618	40.574
145.711	40.3633
145.802	40.2564
145.894	40.1957
145.986	40.1731
146.078	40.1486
146.17	40.0359
146.262	39.9125
146.354	39.8252
146.446	39.7233
146.538	39.6518
146.63	39.5606
146.722	39.4489
146.813	39.397
146.906	39.3274
146.998	39.251
147.09	39.2176
147.182	39.1657
147.273	39.0775
147.365	39.0089
147.458	38.9374
147.55	38.7845
147.642	38.6326
147.733	38.5944
147.825	38.6002
147.917	38.5591
148.009	38.561
148.102	38.5493
148.194	38.4238
148.285	38.3376
148.377	38.2808
148.469	38.219
148.561	38.172
148.654	38.2455
148.745	38.3396
148.837	38.2602
148.929	38.0681
149.021	38.023
149.113	38.0201
149.204	37.9554
149.297	37.5899
149.389	35.8533
149.481	32.388
149.573	27.6399
149.665	19.9087
149.756	11.271
149.849	6.2181
149.941	3.62306
150.033	2.9351
150.125	2.10994
150.216	1.64346
150.308	1.61014
150.401	1.46314
150.493	1.50332
150.585	1.51312
150.676	1.4357
150.768	1.42002
150.86	1.42786
150.952	1.3034
151.045	1.31418
151.137	1.31712
151.228	1.19168
151.32	1.15738
151.412	1.12994
151.504	1.14954
151.597	1.19266
151.688	1.13386
151.78	1.20834
151.872	1.29458
151.964	1.43962
152.056	1.38278
152.147	1.28772
152.24	1.2838
152.332	1.67972
152.424	3.01938
152.516	8.4035
152.608	16.4571
152.699	22.0618
152.792	26.6609
152.884	31.1003
152.976	35.183
153.068	38.2308
153.159	40.1878
153.251	41.3825
153.344	41.8333
153.436	41.6892
153.528	41.4462
153.619	41.1816
153.711	40.9454
153.803	40.7572
153.895	40.5465
153.988	40.3103
154.08	40.1114
154.171	39.9791
154.263	39.835
154.355	39.7184
154.447	39.6528
154.54	39.5704
154.631	39.4617
154.723	39.3676
154.815	39.2627
154.907	39.1814
154.999	39.0883
155.09	39.0109
155.183	38.9775
155.275	38.955
155.367	38.9158
155.459	38.8256
155.55	38.7071
155.642	38.6218
155.735	38.5346
155.827	38.4826
155.919	38.4336
156.011	38.3905
156.102	38.367
156.194	38.2945
156.286	37.483
156.379	34.5646
156.471	29.4078
156.562	22.7674
156.654	14.4677
156.746	8.09186
156.838	4.54524
156.931	2.64894
157.022	2.13836
157.114	1.5925
157.206	1.47196
157.298	1.28478
157.39	1.08976
157.481	1.08976
157.574	0.98294
157.666	0.93296
157.758	1.0486
157.85	1.20834
157.942	1.18384
158.033	1.3181
158.126	1.39454
158.218	1.40532
158.31	1.37788
158.402	1.40434
158.493	1.39552
158.585	1.36024
158.678	1.29654
158.77	1.20344
158.862	1.18776
158.953	1.13288
159.045	1.10936
159.137	1.10838
159.229	1.06428
159.322	1.05448
159.414	1.04566
159.505	1.02508
159.597	1.01626
159.689	1.0192
159.781	1.02802
159.874	1.06036
159.965	1.12014
160.057	1.10642
160.149	1.16326
160.241	1.60034
160.333	3.87688
160.424	10.8437
160.517	18.9111
160.609	24.6764
160.701	29.9076
160.793	34.153
160.885	37.0597
160.976	39.2382
161.069	40.3672
161.161	40.2878
161.253	40.0555
161.345	39.9134
161.436	39.7508
161.528	39.6194
161.62	39.4675
161.713	39.3715
161.805	39.3
161.896	39.1539
161.988	39.005
162.08	38.9295
162.172	38.8619
162.265	38.7169
162.357	38.4836
162.448	38.318
162.54	38.3258
162.632	38.2788
162.724	38.2661
162.817	38.2533
162.908	38.1338
163	37.9936
163.092	37.9417
163.184	37.9113
163.276	37.8427
163.367	37.6888
163.46	37.4899
163.552	37.4752
163.644	37.5183
163.736	37.5203
163.828	37.4262
163.919	37.3762
164.012	37.4517
164.104	37.6614
164.196	37.8015
164.288	37.387
164.379	35.5211
164.471	30.8671
164.563	23.1113
164.656	13.4691
164.748	4.88922
164.839	1.95804
164.931	1.66894
165.023	1.27694
165.115	1.1711
165.208	1.09368
165.299	1.09662
165.391	1.0143
165.483	0.99764
165.575	0.95354
165.667	0.93296
165.76	0.9408
165.851	0.92708
165.943	0.9114
166.035	0.89964
166.127	0.88298
166.219	0.8624
166.31	0.86926
166.403	0.8624
166.495	0.8624
166.587	0.86828
166.679	0.88004
166.77	0.8624
166.862	0.81928
166.955	0.7007
167.047	0.60956
167.139	0.62818
167.231	0.6615
167.322	0.63504
167.414	0.59976
167.506	0.60074
167.599	0.5733
167.691	0.55762
167.782	0.55272
167.874	0.5537
167.966	0.55468
168.058	0.64876
168.151	1.42394
168.242	5.65264
168.334	15.6251
168.426	23.2162
168.518	27.83
168.61	32.2724
168.702	36.4805
168.794	39.6057
168.886	41.3736
168.978	42.4193
169.07	42.8975
169.162	42.8574
169.253	42.6937
169.346	42.4526
169.438	42.2782
169.53	42.1645
169.622	42.0175
169.713	41.8911
169.805	41.8058
169.897	41.6745
169.99	41.5608
170.082	41.5716
170.174	41.5981
170.265	41.5226
170.357	41.4187
170.449	41.3423
170.542	41.2776
170.634	41.1972
170.725	41.1277
170.817	40.8562
170.909	40.4642
171.001	40.3652
171.094	40.3446
171.185	40.231
171.277	40.082
171.369	39.9585
171.461	39.9546
171.553	39.9762
171.645	39.9027
171.737	39.8595
171.829	39.8145
171.921	39.7723
172.013	39.689
172.105	39.5744
172.196	39.4724
172.289	39.4842
172.381	39.6645
172.473	39.6978
172.565	39.0755
172.656	37.777
172.748	35.5132
172.84	30.6946
172.933	22.5243
173.025	13.4946
173.116	6.61696
173.208	2.25498
173.3	1.6905
173.392	1.24754
173.485	0.98588
173.577	0.833
173.668	0.79086
173.76	0.7595
173.852	0.76146
173.944	0.75558
174.036	0.74186
174.128	0.74382
174.22	0.79086
174.312	0.79772
174.404	0.78596
174.496	0.76342
174.588	0.76734
174.68	0.7938
174.772	0.79282
174.864	0.78596
174.956	0.784
175.048	0.78596
175.139	0.81144
175.232	0.82222
175.324	0.82516
175.416	0.8428
175.508	0.8526
175.599	0.833
175.691	0.82222
175.783	0.81732
175.876	0.8085
175.968	0.79282
176.06	0.80066
176.151	0.86632
176.243	1.0976
176.335	1.8326
176.428	5.8898
176.52	12.4823
176.611	17.3803
176.703	23.032
176.795	29.4853
176.887	35.2045
176.979	39.2666
177.071	41.1453
177.163	41.6147
177.255	41.6716
177.347	41.5206
177.439	41.3139
177.531	41.1737
177.623	41.0914
177.715	40.9689
177.807	40.8729
177.899	40.6749
177.991	40.4887
178.082	40.5161
178.174	40.4858
178.267	40.3388
178.359	40.2604
178.451	40.1829
178.543	40.0908
178.634	40.0163
178.726	39.9193
178.819	39.7958
178.911	39.6959
179.003	39.5734
179.094	39.5479
179.186	39.5851
179.278	39.5097
179.371	39.3499
179.463	39.1549
179.554	39.1255
179.646	39.0667
179.738	38.953
179.83	38.8688
179.922	38.7806
180.015	38.6992
180.106	38.5267
180.198	38.3944
180.29	38.2592
180.382	37.7006
180.474	36.4423
180.566	34.0432
180.658	29.5
180.75	21.5041
180.842	11.7002
180.934	4.7236
181.025	2.10602
181.117	1.62092
181.21	1.36514
181.302	1.08682
181.394	0.95648
181.486	0.88004
181.577	0.882
181.669	0.90748
181.762	0.9114
181.854	0.9408
181.946	0.9653
182.037	0.98392
182.129	0.9555
182.221	0.89866
182.313	0.88396
182.406	0.86044
182.497	0.87612
182.589	0.88298
182.681	0.88494
182.773	0.88004
182.865	0.8771
182.958	0.8624
183.049	0.8477
183.141	0.82516
183.233	0.79772
183.325	0.77518
183.417	0.76636
183.508	0.77322
183.601	0.76146
183.693	0.77224
183.785	0.78792
183.877	0.78498
183.968	0.79184
184.06	0.7889
184.153	0.78204
[truncated: 3,647 more rows]

## Sheet: S03-Left hand
Time/s	Force/N
0.404	0
0.496	0
0.588	0
0.68	0
0.773	0
0.865	0
0.956	0
1.048	0
1.14	0
1.232	0
1.325	0
1.416	0
1.508	0
1.6	0
1.692	0
1.784	0
1.876	0
1.968	0
2.06	0
2.152	0
2.244	0
2.336	0
2.428	0
2.52	0
2.612	0
2.704	0
2.796	0
2.888	0
2.979	0
3.072	0
3.164	0
3.256	0
3.348	0
3.44	0
3.531	0
3.623	0
3.716	0
3.808	0
3.9	0
3.992	0
4.083	1.67776
4.175	3.54368
4.268	11.0348
4.36	23.2182
4.452	34.5185
4.543	41.4511
4.635	43.61
4.727	43.8579
4.819	43.8991
4.912	43.7345
5.004	43.513
5.095	43.3003
5.187	43.1259
5.279	42.9505
5.371	42.8231
5.464	42.7662
5.556	42.6898
5.647	42.5986
5.739	42.4918
5.831	42.3448
5.923	42.1851
6.016	42.0547
6.107	41.9861
6.199	41.9646
6.291	41.9597
6.383	41.945
6.475	41.9068
6.567	41.8313
6.659	41.7509
6.751	41.6402
6.843	41.5677
6.935	41.5324
7.027	41.5275
7.118	41.5187
7.211	41.503
7.303	41.503
7.395	41.4844
7.487	41.4373
7.579	41.3893
7.67	41.3364
7.762	41.013
7.855	38.9227
7.947	31.9725
8.039	20.58
8.131	10.5134
8.222	3.50938
8.314	1.17894
8.407	0.97902
8.499	0.6321
8.591	0.55076
8.682	0.60858
8.774	0.71638
8.866	0.8673
8.958	1.38768
9.051	4.90784
9.143	13.6308
9.234	21.5071
9.326	28.8826
9.418	35.867
9.51	40.6553
9.603	43.0406
9.695	44.0098
9.786	44.5243
9.878	44.6988
9.97	44.6537
10.062	44.4577
10.155	44.2539
10.246	44.0608
10.338	43.9814
10.43	43.9334
10.522	43.8423
10.614	43.658
10.706	43.4767
10.798	43.3719
10.89	43.3248
10.982	43.314
11.074	43.2886
11.166	43.2543
11.257	43.1612
11.35	42.9622
11.442	42.7692
11.534	42.6721
11.626	42.6898
11.718	42.7006
11.809	42.6241
11.901	42.5487
11.994	42.4673
12.086	42.4271
12.178	42.3595
12.27	42.2831
12.361	42.191
12.453	42.1028
12.546	41.992
12.638	41.8646
12.73	41.7941
12.821	41.7127
12.913	41.6363
13.005	41.5961
13.097	41.5353
13.19	41.3658
13.282	41.1061
13.373	40.9042
13.465	40.7396
13.557	40.2241
13.649	38.8737
13.742	36.0914
13.834	32.2136
13.925	28.0721
14.017	23.7082
14.109	17.6273
14.201	9.43348
14.294	3.42804
14.385	1.33868
14.477	1.0388
14.569	0.5831
14.661	0.27636
14.753	0.35084
14.845	0.49882
14.937	0.60956
15.029	0.735
15.121	0.78302
15.213	0.81438
15.305	0.82614
15.396	0.85064
15.489	0.88102
15.581	0.87514
15.673	0.86534
15.765	0.85358
15.857	0.84672
15.948	0.8134
16.04	0.73892
16.133	0.65366
16.225	0.86632
16.317	2.7881
16.409	11.7688
16.5	22.5851
16.592	28.5386
16.685	33.0583
16.777	36.898
16.869	39.8625
16.96	42.0126
17.052	43.3787
17.144	44.1421
17.236	44.3842
17.329	44.3323
17.421	44.1862
17.512	44.0775
17.604	43.9216
17.696	43.7864
17.788	43.6904
17.881	43.5884
17.973	43.4601
18.064	43.3091
18.156	43.1945
18.248	43.0867
18.34	42.9848
18.433	42.8711
18.524	42.8093
18.616	42.7721
18.708	42.7133
18.8	42.6065
18.892	42.5251
18.984	42.4987
19.076	42.483
19.168	42.4291
19.26	42.3605
19.352	42.3233
19.444	42.2899
19.536	42.2213
19.628	42.1772
19.72	42.1772
19.812	42.1302
19.904	42.089
19.996	42.0371
20.087	41.991
20.179	41.9754
20.272	41.944
20.364	41.9195
20.456	41.8744
20.548	41.8068
20.639	41.797
20.731	41.8097
20.824	41.7509
20.916	41.3687
21.008	40.0124
21.1	36.9872
21.191	31.9549
21.283	25.2164
21.376	17.7919
21.468	10.4605
21.56	4.41588
21.651	2.18442
21.743	1.42688
21.835	1.12014
21.927	0.9065
22.02	0.56056
22.112	0.39004
22.203	0.4214
22.295	0.44884
22.387	0.46942
22.479	0.49392
22.572	0.49588
22.664	0.50372
22.755	0.5096
22.847	0.51156
22.939	0.5243
23.031	0.53606
23.123	0.53214
23.215	0.53802
23.307	0.54978
23.399	0.54684
23.491	0.54096
23.583	0.56644
23.675	0.59094
23.767	0.59682
23.859	0.6174
23.951	0.71344
24.043	1.04958
24.135	1.5043
24.227	4.1748
24.318	10.9505
24.411	15.7496
24.503	20.0224
24.595	25.3565
24.687	30.1771
24.778	33.91
24.87	36.6491
24.963	38.8707
25.055	40.426
25.147	41.5873
25.239	42.4173
25.33	42.8574
25.422	42.9465
25.515	42.8456
25.607	42.6761
25.699	42.5242
25.791	42.3674
25.882	42.3076
25.974	42.2948
26.066	42.2645
26.159	42.2037
26.251	42.1214
26.342	42.0547
26.434	42.0175
26.526	42.04
26.618	42.0302
26.711	41.9665
26.803	41.9215
26.894	41.8607
26.986	41.7607
27.078	41.7225
27.17	41.7411
27.262	41.7274
27.354	41.6755
27.446	41.6373
27.538	41.5922
27.63	41.5246
27.722	41.4971
27.814	41.505
27.906	41.4912
27.998	41.452
28.09	41.4109
28.182	41.3403
28.274	41.2884
28.365	41.2413
28.457	41.2511
28.55	41.2296
28.642	41.0042
28.734	40.2329
28.826	38.4072
28.917	35.5123
29.009	31.1738
29.102	25.9034
29.194	20.0175
29.286	14.0846
29.378	8.14282
29.469	3.43882
29.561	1.64738
29.654	1.26322
29.746	0.92414
29.838	0.80654
29.929	0.6517
30.021	0.6125
30.113	0.61544
30.205	0.6174
30.298	0.62426
30.39	0.67816
30.481	0.79086
30.573	0.91238
30.665	1.10054
30.757	1.73656
30.85	5.2087
30.941	11.2651
31.033	17.2049
31.125	23.0751
31.217	28.3367
31.309	32.7457
31.401	35.9885
31.493	38.0897
31.585	39.5744
31.677	40.6798
31.769	41.3276
31.861	41.5001
31.952	41.4432
32.045	41.2766
32.137	41.1228
32.229	40.9601
32.321	40.8229
32.413	40.7298
32.504	40.6132
32.596	40.5112
32.689	40.3956
32.781	40.3192
32.873	40.2447
32.965	40.1722
33.056	40.0898
33.148	40.0565
33.241	40.0144
33.333	39.9967
33.425	39.9409
33.516	39.888
33.608	39.8409
33.7	39.8017
33.793	39.7841
33.885	39.7684
33.977	39.7478
34.068	39.7243
34.16	39.7449
34.252	39.7116
34.344	39.6733
34.437	39.6106
34.528	39.5263
34.62	39.4822
34.712	39.4626
34.804	39.4754
34.896	39.5293
34.989	39.5734
35.08	39.5646
35.172	39.5018
35.264	39.394
35.356	39.0657
35.448	37.924
35.54	35.2516
35.632	31.8265
35.724	27.9917
35.816	22.7977
35.908	17.3166
36	11.8208
36.091	6.61892
36.184	3.0429
36.276	1.51802
36.368	1.16424
36.46	0.85064
36.552	0.5635
36.643	0.34104
36.736	0.23128
36.828	0.1666
36.92	0.16856
37.012	0.2646
37.103	0.343
37.195	0.78792
37.287	1.68266
37.38	5.67126
37.472	12.9527
37.564	18.1065
37.655	22.7968
37.747	27.6987
37.839	32.192
37.932	35.8357
38.024	38.4503
38.115	40.2437
38.207	41.5255
38.299	42.2174
38.391	42.4066
38.483	42.2164
38.576	41.8862
38.667	41.5167
38.759	41.2521
38.851	41.0728
38.943	40.9532
39.035	40.8327
39.127	40.6984
39.219	40.5936
39.311	40.4789
39.403	40.3721
39.495	40.2819
39.587	40.2241
39.678	40.1594
39.771	40.1143
39.863	40.0526
39.955	39.985
40.047	39.9428
40.139	39.9076
40.23	39.8546
40.323	39.8076
40.415	39.787
40.507	39.7664
40.599	39.739
40.69	39.7312
40.782	39.7243
40.875	39.7027
40.967	39.689
41.059	39.6586
41.15	39.6322
41.242	39.6038
41.334	39.5479
41.426	39.5273
41.519	39.5195
41.611	39.4773
41.702	39.4352
41.794	39.3186
41.886	38.8756
41.978	37.5801
42.071	34.7136
42.162	30.3526
42.254	23.6601
42.346	15.3203
42.438	8.85136
42.53	3.98762
42.622	1.70324
42.714	1.18776
42.806	0.88004
42.898	0.72324
42.99	0.52234
43.082	0.53214
43.174	0.75558
43.266	1.03782
43.358	1.68364
43.45	4.75496
43.542	8.7955
43.634	11.7492
43.725	15.7496
43.817	21.0974
43.91	26.4992
44.002	30.9494
44.094	34.2539
44.185	36.8019
44.277	38.9315
44.369	40.6357
44.462	41.6647
44.554	42.1772
44.646	42.2703
44.737	42.1537
44.829	41.9881
44.921	41.8597
45.014	41.7088
45.106	41.5726
45.197	41.4462
45.289	41.3286
45.381	41.2629
45.473	41.1914
45.565	41.0885
45.658	40.9728
45.749	40.8885
45.841	40.8327
45.933	40.7896
46.025	40.7376
46.117	40.6651
46.209	40.6122
46.301	40.5524
46.393	40.4887
46.485	40.4309
46.577	40.4034
46.669	40.3584
46.76	40.3162
46.853	40.2711
46.945	40.2045
47.037	40.1506
47.129	40.1124
47.221	40.0918
47.312	40.0575
47.405	40.0261
47.497	39.9889
47.589	39.9203
47.681	39.8586
47.772	39.8145
47.864	39.7645
47.956	39.7312
48.049	39.69
48.141	39.6459
48.233	39.6508
48.324	39.6047
48.416	39.4842
48.508	39.2167
48.601	38.4042
48.693	36.2884
48.784	32.5644
48.876	27.3665
48.968	19.8401
49.06	11.7757
49.153	5.44684
49.245	2.1756
49.336	1.27988
49.428	0.9212
49.52	0.46746
49.612	0.049
49.704	0
49.797	0.0343
49.888	0.45766
49.98	0.92806
50.072	1.3769
50.164	4.3267
50.256	10.9182
50.348	15.7594
50.44	20.1321
50.532	25.3291
50.624	29.8763
50.716	33.7071
50.808	36.6677
50.899	38.7384
50.992	40.0379
51.084	40.7523
51.176	40.9718
51.268	40.9826
51.359	40.9287
51.451	40.866
51.544	40.7494
51.636	40.6249
51.728	40.5152
51.82	40.4436
51.911	40.3623
52.003	40.2241
52.096	40.0996
52.188	39.982
52.28	39.9056
52.371	39.8194
52.463	39.7772
52.555	39.7508
52.647	39.7116
52.74	39.6714
52.832	39.6508
52.923	39.6175
53.015	39.5881
53.107	39.5499
53.199	39.5038
53.292	39.4724
53.383	39.4205
53.475	39.3401
53.567	39.2745
53.659	39.2382
53.751	39.1902
53.843	39.1539
53.935	39.0922
54.027	39.0501
54.119	39.0256
54.211	39.004
54.303	38.9726
54.394	38.9236
54.487	38.8746
54.579	38.8247
54.671	38.7708
54.763	38.71
54.855	38.5532
54.946	37.8897
55.038	35.7269
55.131	31.8245
55.223	26.3561
55.315	18.5955
55.406	10.9966
55.498	5.44684
55.59	1.9894
55.683	1.27008
55.775	0.9457
55.867	0.5439
55.958	0.28518
56.05	0.16954
56.142	0.23814
56.235	0.41944
56.327	0.63014
56.419	0.92806
56.51	1.3622
56.602	3.35944
56.694	9.555
56.786	15.8907
56.879	21.5796
56.97	27.2705
57.062	32.048
57.154	35.5936
57.246	38.3278
57.338	40.1996
57.431	41.0591
57.522	41.2237
57.614	41.1424
57.706	40.9826
57.798	40.8111
57.89	40.668
57.981	40.4809
58.074	40.3172
58.166	40.231
58.258	40.1457
58.35	40.0555
58.442	39.9742
58.533	39.9174
58.626	39.8458
58.718	39.7792
58.81	39.6871
58.902	39.6077
58.993	39.5401
59.085	39.4764
59.177	39.4342
59.27	39.4185
59.362	39.3852
59.454	39.3294
59.545	39.2725
59.637	39.2421
59.729	39.2069
59.822	39.1588
59.914	39.149
60.005	39.1255
60.097	39.0765
60.189	39.0393
60.281	38.9677
60.374	38.9129
60.466	38.8599
60.557	38.8119
60.649	38.7237
60.741	38.6326
60.833	38.5356
60.925	38.3062
61.017	37.5624
61.109	35.5456
61.201	31.8363
61.293	26.5237
61.385	19.3873
61.477	12.6067
61.569	7.25004
61.661	3.58778
61.753	1.57094
61.845	1.13288
61.937	0.94374
62.028	0.54978
62.12	0.26264
62.213	0.25088
62.305	0.29988
62.397	0.54586
62.489	0.98098
62.58	1.38082
62.672	3.0086
62.765	6.91096
62.857	10.145
62.949	13.9385
63.041	19.3403
63.132	25.3448
63.224	30.5858
63.316	34.3245
63.409	36.7647
63.501	38.3435
63.592	39.1294
63.684	39.2412
63.776	39.1383
63.868	39.0177
63.961	38.9423
64.053	38.9011
64.144	38.8051
64.236	38.6757
64.328	38.512
64.42	38.3562
64.513	38.2612
64.604	38.1867
64.696	38.12
64.788	38.0524
64.88	37.974
64.972	37.9691
65.063	37.9652
65.156	37.9642
65.248	37.9515
65.34	37.9378
65.432	37.8623
65.524	37.729
65.615	37.6134
65.708	37.5134
65.8	37.4076
65.892	37.3439
65.984	37.339
66.075	37.3311
66.167	37.3047
66.259	37.2772
66.352	37.2224
66.444	37.1949
66.536	37.2145
66.627	37.238
66.719	37.2273
66.811	37.2204
66.904	37.189
66.996	37.1557
67.088	37.1224
67.179	37.0499
67.271	36.9137
67.363	36.7853
67.456	36.6961
67.548	36.6373
67.639	36.5707
67.731	36.2669
67.823	34.8292
67.915	31.1336
68.007	25.7809
68.1	19.5285
68.191	12.6008
68.283	6.69634
68.375	2.95568
68.467	1.52978
68.559	1.1662
68.651	0.82516
68.743	0.50176
68.835	0.19012
68.927	0.147
69.019	0.15582
69.111	0.15386
69.202	0.196
69.295	0.34594
69.387	0.66738
69.479	0.8624
69.571	1.02998
69.662	1.2838
69.754	2.23146
69.847	4.47468
69.939	8.04972
70.031	14.9528
70.123	22.7017
70.214	28.4249
70.306	32.4204
70.398	35.3025
70.491	37.4899
70.583	39.2764
70.674	40.5387
70.766	41.308
70.858	41.601
70.95	41.5128
71.043	41.2707
71.135	41.0228
71.226	40.7278
71.318	40.4818
71.41	40.2809
71.502	40.1104
71.595	39.9693
71.686	39.8007
71.778	39.6635
71.87	39.5949
71.962	39.5234
72.054	39.4626
72.146	39.3862
72.238	39.2735
72.33	39.1755
72.422	39.0873
72.514	38.9981
72.606	38.9315
72.697	38.8942
72.79	38.8952
72.882	38.8933
72.974	38.8374
73.066	38.7678
73.158	38.7178
73.249	38.6884
73.341	38.6463
73.434	38.5552
73.526	38.467
73.618	38.4258
73.71	38.4229
73.801	38.418
73.893	38.416
73.986	38.3797
74.078	38.3268
74.17	38.3023
74.261	38.2582
74.353	38.1651
74.445	38.0622
74.537	37.9858
74.63	37.9378
74.722	37.8956
74.813	37.7712
74.905	37.3635
74.997	36.161
75.089	33.2769
75.182	29.0266
75.274	24.0404
75.365	17.2882
75.457	10.7153
75.549	5.75554
75.641	2.83024
75.734	1.53174
75.825	1.20442
75.917	0.87416
76.009	0.5733
76.101	0.30478
76.193	0.2499
76.285	0.3038
76.377	0.32144
76.469	0.3528
76.561	0.6027
76.653	1.11622
76.745	2.16874
76.836	6.91488
76.929	13.1163
77.021	18.1369
77.113	23.9483
77.205	29.2138
77.297	33.3386
77.388	36.6873
77.48	38.9256
77.573	40.0585
77.665	40.3946
77.757	40.3025
77.848	40.0614
77.94	39.8948
78.032	39.7625
78.125	39.6224
78.217	39.4352
78.309	39.3284
78.4	39.2118
78.492	39.0922
78.584	39.0011
78.676	38.8825
78.769	38.7923
78.86	38.712
78.952	38.6502
79.044	38.5934
79.136	38.5659
79.228	38.5032
79.321	38.4356
79.412	38.3886
79.504	38.367
79.596	38.3249
79.688	38.2719
79.78	38.218
79.873	38.1798
79.964	38.1504
80.056	38.1289
80.148	38.1093
80.24	38.0789
80.332	38.0534
80.423	37.976
80.516	37.8976
80.608	37.8339
80.7	37.7721
80.792	37.7202
80.884	37.6692
80.975	37.6134
81.068	37.5722
81.16	37.5516
81.252	37.5183
81.344	37.487
81.436	37.4536
81.527	37.3997
81.619	37.2743
81.712	37.0038
81.804	36.1904
81.896	34.1305
81.987	30.9072
82.079	26.3512
82.171	19.3305
82.264	11.3239
82.356	5.48996
82.448	2.27066
82.539	1.31124
82.631	1.0633
82.723	0.67718
82.816	0.37338
82.908	0.21658
83	0.20286
83.091	0.21952
83.183	0.3969
83.275	0.81242
83.367	1.13092
83.46	1.72774
83.551	4.49624
83.643	8.93172
83.735	13.2398
83.827	18.7082
83.919	24.3697
84.012	28.7777
84.103	32.244
84.195	34.9537
84.287	37.0264
84.379	38.4866
84.471	39.3235
84.563	39.593
84.655	39.5371
84.747	39.3646
84.839	39.1686
84.931	38.9775
85.023	38.8041
85.114	38.6404
85.207	38.4562
85.299	38.2857
85.391	38.1338
85.483	37.9691
85.575	37.8182
85.666	37.7251
85.758	37.633
85.851	37.5477
85.943	37.487
86.035	37.4301
86.126	37.3762
86.218	37.3498
86.31	37.3125
86.403	37.2459
86.495	37.1743
86.587	37.092
86.678	37.0528
86.77	37.0322
86.862	37.0175
86.955	36.9725
87.047	36.9215
87.139	36.8568
87.23	36.7814
87.322	36.7235
87.414	36.6932
87.506	36.6638
87.599	36.6265
87.69	36.5785
87.782	36.5226
87.874	36.4393
87.966	36.3796
88.058	36.2816
88.151	36.0444
88.242	35.475
88.334	34.1285
88.426	31.4933
88.518	27.8163
88.61	22.6155
88.702	15.0744
88.794	8.29276
88.886	4.18068
88.978	2.009
89.07	1.52684
89.162	1.19658
89.253	0.85946
89.346	0.57526
89.438	0.30674
89.53	0.14798
89.622	0.19404
89.714	0.43022
89.805	0.88298
89.897	1.29948
89.99	2.59798
90.082	7.26572
90.174	12.7116
90.265	18.2574
90.357	24.5637
90.449	30.0644
90.542	34.2363
90.634	37.0567
90.726	38.5503
90.817	39.0011
90.909	38.855
91.001	38.565
91.094	38.3209
91.186	38.2131
91.277	38.171
91.369	38.1779
91.461	38.1867
91.553	38.2092
91.645	38.1681
91.738	38.0642
91.829	37.9309
91.921	37.8329
92.013	37.7114
92.105	37.5977
92.197	37.4899
92.29	37.4487
92.381	37.4213
92.473	37.3321
92.565	37.2233
92.657	37.1302
92.749	37.0528
92.84	37.0136
92.933	36.9999
93.025	36.9979
93.117	36.9842
93.209	36.9362
93.301	36.849
93.392	36.7373
93.485	36.6402
93.577	36.5422
93.669	36.4668
93.761	36.4021
93.853	36.3462
93.944	36.3217
94.036	36.3031
94.129	36.2404
94.221	36.0905
94.313	35.8366
94.404	35.4005
94.496	34.6783
94.588	33.5699
94.681	31.7412
94.773	29.0296
94.865	25.1654
94.956	18.4642
95.048	9.49424
95.14	3.5378
95.233	1.56114
95.325	1.09564
95.417	0.61544
95.508	0.19502
95.6	0.20384
95.692	0.5145
95.784	1.19462
95.877	3.16148
95.968	9.67946
96.06	16.2415
96.152	21.4512
96.244	26.9823
96.336	31.8657
96.429	35.4495
96.52	38.1416
96.612	39.4783
96.704	39.8625
96.796	39.7802
96.888	39.5028
96.98	39.1069
97.072	38.5885
97.164	38.1455
97.256	37.8447
97.348	37.6653
97.44	37.6006
97.531	37.7143
97.624	37.8172
97.716	37.8231
97.808	37.7369
97.9	37.534
97.992	37.2831
98.083	37.1106
98.176	37.2077
98.268	37.4683
98.36	37.7182
98.452	37.8701
98.543	37.9054
98.635	37.8476
98.727	37.7378
98.82	37.6379
98.912	37.5977
99.004	37.5771
99.095	37.5605
99.187	37.5173
99.279	37.4713
99.372	37.4213
99.464	37.3743
99.555	37.3125
99.647	37.2155
99.739	37.1214
99.831	37.0597
99.923	37.0077
100.016	36.946
100.107	36.8539
100.199	36.6863
100.291	36.4697
100.383	36.2796
100.475	36.1473
100.568	36.1071
100.659	36.0865
100.751	35.8219
100.843	34.5862
100.935	31.1375
101.027	25.3761
101.118	17.8879
101.211	9.7951
101.303	4.43548
101.395	1.86494
101.487	1.14758
101.579	0.8281
101.67	0.29988
101.763	0.03136
101.855	0.01862
101.947	0.09604
102.039	0.34496
102.13	0.98
102.222	1.82672
102.315	6.24946
102.407	13.3613
102.499	18.8434
102.591	24.4726
102.682	30.1007
102.774	34.2628
102.866	37.042
102.959	38.9354
103.051	40.1016
103.142	40.5475
103.234	40.5416
103.326	40.376
103.418	40.1604
103.511	39.9399
103.603	39.7713
103.694	39.6038
103.786	39.4391
103.878	39.2412
103.97	39.054
104.062	38.8756
104.154	38.7678
104.246	38.709
104.338	38.6757
104.43	38.614
104.522	38.5267
104.614	38.4376
104.706	38.3699
104.798	38.3092
104.89	38.267
104.982	38.2259
105.074	38.1612
105.165	38.0975
105.257	38.0436
105.35	37.9917
105.442	37.9299
105.534	37.8829
105.626	37.828
105.717	37.7721
105.809	37.7241
105.902	37.682
105.994	37.6251
106.086	37.5703
106.178	37.5154
106.269	37.4801
106.361	37.4664
106.454	37.4311
106.546	37.3978
106.638	37.385
106.729	37.3556
106.821	37.3341
106.913	37.3017
107.005	37.2439
107.098	37.1949
107.19	37.1273
107.281	36.8862
107.373	35.8553
107.465	33.2583
107.557	29.7891
107.65	25.5515
107.741	19.5481
107.833	13.6044
107.925	7.6244
108.017	3.11248
108.109	1.44746
108.201	1.1907
108.293	0.75166
108.385	0.48118
108.477	0.32536
108.569	0.28224
108.661	0.31262
108.752	0.37338
108.845	0.43316
108.937	0.68306
109.029	0.88298
109.121	0.95452
109.213	1.41904
109.304	3.88472
109.396	10.3184
109.489	16.0867
109.581	20.6535
109.673	25.2928
109.764	29.6342
109.856	33.1407
109.948	35.817
110.041	37.8104
110.133	39.2353
110.225	40.0193
110.316	40.2427
110.408	40.1437
110.5	39.9242
110.593	39.6596
110.685	39.3441
110.777	39.0599
110.868	38.8835
110.96	38.7776
111.052	38.661
111.144	38.5561
111.237	38.5032
111.328	38.4552
111.42	38.4003
111.512	38.3092
111.604	38.2082
111.696	38.1308
111.789	38.0554
111.88	37.9809
111.972	37.9162
112.064	37.8574
112.156	37.8251
112.248	37.8015
112.339	37.7506
112.432	37.6624
112.524	37.5752
112.616	37.4948
112.708	37.4419
112.8	37.4389
112.891	37.4409
112.984	37.4164
113.076	37.4037
113.168	37.3684
113.26	37.3135
113.351	37.24
113.443	37.1655
113.536	37.1057
113.628	37.0616
113.72	37.0322
113.812	36.9989
113.903	36.9597
113.995	36.9382
114.087	36.8892
114.18	36.8264
114.272	36.7588
114.363	36.7118
114.455	36.6108
114.547	36.4472
114.639	36.2678
114.732	36.1287
114.823	36.0895
114.915	36.0669
115.007	35.9346
115.099	35.524
115.191	34.0815
115.283	30.9925
115.375	26.9079
115.467	21.1347
115.559	13.8082
115.651	7.95466
115.743	3.53388
115.835	1.63366
115.927	1.27302
116.019	0.85456
116.111	0.48706
116.203	0.34398
116.295	0.4459
116.386	0.97412
116.478	1.66796
116.571	5.0176
116.663	11.713
116.755	16.4042
116.847	21.1641
116.938	26.7452
117.03	31.6168
117.123	35.1526
117.215	37.8427
117.307	39.8742
117.398	40.9268
117.49	41.1865
117.582	41.1561
117.675	41.0512
117.767	40.8758
117.859	40.6867
117.95	40.474
118.042	40.2682
118.134	40.1428
118.226	40.0526
118.319	39.9517
118.41	39.8605
118.502	39.7635
118.594	39.6537
118.686	39.5361
118.778	39.4773
118.871	39.4019
118.962	39.347
119.054	39.2911
119.146	39.2098
119.238	39.1432
119.33	39.0844
119.421	39.0236
119.514	38.9501
119.606	38.859
119.698	38.7492
119.79	38.6826
119.882	38.6375
119.973	38.5934
120.066	38.5561
120.158	38.5169
120.25	38.4493
120.342	38.4317
120.433	38.4307
120.525	38.4229
120.617	38.3964
120.71	38.3964
120.802	38.417
120.894	38.4121
120.985	38.3876
121.077	38.3484
121.169	38.2974
121.262	38.2504
121.354	38.2416
121.446	38.221
121.537	38.1769
121.629	38.0603
121.721	37.7467
121.814	36.9264
121.906	35.3907
121.997	32.9643
122.089	28.9247
122.181	22.9085
122.273	14.9421
122.365	7.448
122.458	2.8077
122.549	1.43178
122.641	1.176
122.733	0.784
122.825	0.44884
122.917	0.18914
123.009	0.28028
123.101	0.67522
123.193	1.06134
123.285	1.9159
123.377	5.67714
123.469	11.221
123.56	16.2572
123.653	21.9089
123.745	27.6605
123.837	32.3939
123.929	35.9366
124.02	38.3474
124.112	39.9007
124.205	40.8101
124.297	41.2286
124.389	41.2012
124.481	40.9983
124.572	40.7033
124.664	40.4632
124.756	40.2055
124.849	40.0408
124.941	39.9144
125.032	39.786
125.124	39.641
125.216	39.4881
125.308	39.3833
125.401	39.3107
125.493	39.2049
125.584	39.0902
125.676	39.0216
125.768	38.9462
125.86	38.8452
125.953	38.7218
126.044	38.6463
126.136	38.5444
126.228	38.4552
126.32	38.4003
126.412	38.3396
126.504	38.2759
126.596	38.2102
126.688	38.1661
126.78	38.1269
126.872	38.074
126.964	38.026
127.055	37.9662
127.148	37.9093
127.24	37.8525
127.332	37.8055
127.424	37.7457
127.516	37.6712
127.607	37.6163
127.699	37.5663
127.792	37.5232
127.884	37.4693
127.976	37.4242
128.067	37.4311
128.159	37.4389
128.251	37.4242
128.344	37.388
128.436	37.3233
128.528	37.2665
128.619	37.2282
128.711	37.1724
128.803	37.1567
128.896	37.1459
128.988	37.092
129.079	37.0479
129.171	37.0136
129.263	36.9705
129.355	36.9284
129.447	36.8999
129.54	36.8774
129.631	36.8999
129.723	36.9342
129.815	36.8323
129.907	36.3854
129.999	34.9556
130.092	31.6569
130.183	26.5208
130.275	19.3648
130.367	9.9519
130.459	4.29534
130.551	1.97764
130.642	1.2201
130.735	1.03194
130.827	0.7056
130.919	0.5978
131.011	0.81144
131.103	1.14268
131.194	1.8522
131.287	5.34884
131.379	11.2386
131.471	17.2676
131.563	23.6944
131.654	29.4186
131.746	33.3543
131.838	36.1199
131.931	38.2788
132.023	39.7429
132.115	40.3878
132.206	40.574
132.298	40.5171
132.39	40.3584
132.483	40.2231
132.575	40.0399
132.666	39.8037
132.758	39.5832
132.85	39.396
132.942	39.2284
133.035	39.1128
133.127	38.9913
133.218	38.8296
133.31	38.5346
133.402	38.2249
133.494	38.0122
133.586	37.7663
133.678	37.5595
133.77	37.4585
133.862	37.4919
133.954	37.5428
134.046	37.5614
134.138	37.5801
134.23	37.5467
134.322	37.4997
134.414	37.4438
134.506	37.3537
134.598	37.2596
134.69	37.1743
134.781	37.1136
134.874	37.0793
134.966	37.0411
135.058	36.9558
135.15	36.9068
135.241	36.9009
135.333	36.8578
135.426	36.7921
135.518	36.7343
135.61	36.7422
135.702	36.8
135.793	36.895
135.885	37.0332
135.977	37.142
136.07	37.1077
136.162	36.9558
136.253	36.7588
136.345	36.6089
136.437	36.5511
136.529	36.5001
136.622	36.3737
136.714	36.2796
136.805	36.2267
136.897	36.1708
136.989	36.1199
137.081	36.1414
137.174	36.1953
137.266	36.2335
137.357	36.1855
137.449	36.0473
137.541	35.8474
137.633	35.5005
137.725	34.6714
137.817	32.3576
137.909	28.0545
138.001	22.3705
138.093	14.9675
138.185	7.60382
138.277	2.95666
138.369	1.50038
138.461	1.1858
138.553	0.78498
138.645	0.45864
138.737	0.23618
138.828	0.44296
138.92	0.84868
139.013	1.06918
139.105	1.28674
139.197	2.71754
139.289	7.5509
139.38	14.4922
139.472	21.2699
139.565	27.3528
139.657	31.9137
139.749	35.4437
139.84	38.171
139.932	40.1624
140.024	41.3491
140.116	41.7
140.209	41.5922
140.301	41.3482
140.392	41.0444
140.484	40.6641
140.576	40.4034
140.668	40.2496
140.761	40.1594
140.853	40.0565
140.944	39.9722
141.036	39.8047
141.128	39.6204
141.22	39.4979
141.313	39.4068
141.404	39.3107
141.496	39.2431
141.588	39.1824
141.68	39.1089
141.772	39.0265
141.864	38.8942
141.956	38.7874
142.048	38.7041
142.14	38.613
142.232	38.5375
142.324	38.4758
142.415	38.4052
142.508	38.3474
142.6	38.2915
142.692	38.2523
142.784	38.2425
142.876	38.2249
142.967	38.219
143.059	38.221
143.152	38.2612
143.244	38.3062
143.336	38.3317
143.427	38.3327
143.519	38.2955
143.611	38.2474
143.704	38.1955
143.796	38.1739
143.888	38.1475
143.979	38.0877
144.071	38.023
144.163	37.9642
144.256	37.8888
144.348	37.8153
144.439	37.7555
144.531	37.6839
144.623	37.5487
144.715	37.2576
144.807	36.6089
144.9	35.379
144.991	32.9848
145.083	28.6336
145.175	22.6086
145.267	14.7196
145.359	7.00014
145.451	2.85964
145.543	1.54742
145.635	1.20932
145.727	0.87612
145.819	0.57624
145.911	0.27244
146.002	0.14504
146.095	0.17738
146.187	0.40866
146.279	1.09368
146.371	2.98606
146.462	9.50796
146.554	15.9907
146.647	21.119
146.739	27.0137
146.831	32.3655
146.923	36.3874
147.014	39.104
147.106	40.6092
147.198	41.2551
147.291	41.3736
147.383	41.2051
147.475	40.9013
147.566	40.5896
147.658	40.3701
147.75	40.1624
147.843	39.9987
147.935	39.8635
148.026	39.6822
148.118	39.4969
148.21	39.2637
148.302	39.0736
148.395	38.9089
148.487	38.6963
148.578	38.5434
148.67	38.4983
148.762	38.464
148.854	38.3886
148.946	38.3562
149.038	38.3474
149.13	38.2925
149.222	38.1945
149.314	38.1034
149.406	38.0309
149.498	37.973
149.59	37.928
149.682	37.8829
149.774	37.8456
149.866	37.7947
149.958	37.7339
150.05	37.6839
150.141	37.6418
150.234	37.5869
150.326	37.5536
150.418	37.5262
150.51	37.4899
150.601	37.4438
150.693	37.4409
150.786	37.4703
150.878	37.4615
150.97	37.4291
151.062	37.3792
151.153	37.3302
151.245	37.2978
151.337	37.2518
151.43	37.2292
151.522	37.2067
151.613	37.1851
151.705	37.1577
151.797	37.093
151.889	37.0126
151.982	36.9342
152.074	36.8666
152.165	36.8323
152.257	36.7902
152.349	36.7618
152.441	36.7226
152.534	36.6804
152.626	36.601
152.717	36.3639
152.809	35.6161
152.901	33.858
152.993	30.332
153.085	24.647
153.177	16.9364
153.269	7.45878
153.361	2.39022
153.453	1.3916
153.545	0.88592
153.637	0.40376
153.729	0.03234
153.821	0.53116
153.913	1.43962
154.005	5.0274
154.097	12.6449
154.188	19.0639
154.28	24.7871
154.373	29.8792
154.465	34.0236
154.557	37.1204
154.649	39.5156
154.74	40.9865
154.832	41.6961
154.925	41.8823
155.017	41.6676
155.109	41.3482
155.201	41.0953
155.292	40.8709
155.384	40.6759
155.476	40.4456
155.569	40.2672
155.661	40.0928
155.752	39.9105
155.844	39.7459
155.936	39.5959
156.028	39.4352
156.121	39.2931
156.213	39.2696
156.304	39.2412
156.396	39.202
156.488	39.1696
156.58	39.1049
156.673	38.9834
156.764	38.9305
156.856	38.908
156.948	38.8423
157.04	38.8002
157.132	38.7737
157.224	38.7443
157.316	38.7335
157.408	38.7227
157.5	38.6826
157.592	38.6522
157.684	38.6434
157.775	38.6345
157.868	38.6071
157.96	38.6051
158.052	38.6032
158.144	38.6032
158.236	38.6002
158.327	38.6071
158.419	38.6316
158.512	38.6394
158.604	38.6071
158.696	38.5679
158.787	38.5169
158.879	38.4719
158.971	38.4983
159.064	38.513
159.156	38.5209
159.248	38.4817
159.339	38.4699
159.431	38.4327
159.523	38.3219
159.616	38.0201
159.708	37.4693
159.8	36.3315
159.891	31.3286
159.983	20.8025
160.075	12.347
160.167	6.35726
160.26	1.8767
160.351	1.15346
160.443	0.74774
160.535	0.14504
160.627	0.03332
160.719	0.29792
160.812	1.08192
160.903	3.50056
160.995	10.3821
161.087	16.5414
161.179	21.5051
161.271	27.0911
161.362	32.6624
161.455	37.0244
161.547	39.7194
161.639	40.8346
161.731	41.0336
161.823	40.8689
161.914	40.7121
162.007	40.5877
162.099	40.5132
162.191	40.4015
162.283	40.2996
162.374	40.2143
162.466	40.0546
162.558	39.8889
162.651	39.7635
162.743	39.6253
162.835	39.3372
162.926	39.2196
163.018	39.3176
163.11	39.5361
163.203	39.5802
163.295	39.5312
163.386	39.3764
163.478	39.1285
163.57	38.9109
163.662	38.7463
163.755	38.7521
163.847	38.7815
163.938	38.7492
164.03	38.6404
164.122	38.5561
164.214	38.4581
164.306	38.3954
164.399	38.3837
164.49	38.3915
164.582	38.3944
164.674	38.3827
164.766	38.3494
164.858	38.3033
164.95	38.2347
165.042	38.1612
165.134	38.1083
165.226	38.0446
165.318	37.9515
165.41	37.8182
165.501	37.5908
165.594	37.1567
165.686	36.0895
165.778	33.5248
165.87	28.3475
165.962	18.9473
166.053	8.5701
166.146	2.69108
166.238	0.99568
166.33	0.75068
166.422	0.29106
166.513	0.36946
166.605	0.98686
166.697	2.2883
166.79	7.61558
166.882	14.8989
166.974	21.5659
167.065	28.3485
167.157	34.3206
167.249	38.5669
167.342	41.1012
167.434	42.1194
167.525	41.9832
167.617	41.4667
167.709	41.0032
167.801	40.6024
167.894	40.4064
167.986	40.3074
168.077	40.1604
168.169	40.0193
168.261	39.8017
168.353	39.6214
168.445	39.5303
168.537	39.5156
168.629	39.5851
168.721	39.5224
168.813	39.394
168.905	39.3607
168.997	39.3715
169.089	39.3333
169.181	39.3294
169.273	39.3176
169.365	39.2843
169.457	39.2598
169.548	39.2304
169.64	39.2049
169.733	39.1726
169.825	39.1569
169.917	39.1255
170.009	39.0569
170.1	39.0177
170.192	38.9932
170.285	38.9668
170.377	38.9432
170.469	38.9031
170.56	38.8697
170.652	38.8394
170.744	38.8139
170.836	38.7796
170.929	38.759
171.021	38.7443
171.112	38.7208
171.204	38.6924
171.296	38.5934
171.388	38.1289
171.481	36.3119
171.572	32.7183
171.664	26.5041
171.756	15.2067
171.848	4.74026
171.94	1.49646
172.033	1.06134
172.124	0.67032
172.216	0.31654
172.308	0.20874
172.4	0.2352
172.492	0.27832
172.583	0.53802
172.676	1.14072
172.768	2.70186
172.86	8.58676
172.952	15.4683
173.044	21.0974
173.135	27.1676
173.228	33.1367
173.32	37.5605
173.412	40.0693
173.504	40.7602
173.595	40.2672
173.687	39.4548
173.779	38.7031
173.872	38.2984
173.964	38.4317
174.056	38.8325
174.147	38.8962
174.239	38.4483
174.331	38.1759
174.424	38.318
174.516	38.4434
174.607	38.4954
174.699	38.3817
174.791	38.1896
174.883	38.0857
174.976	37.9681
175.068	37.924
175.159	37.973
175.251	38.0446
175.343	38.075
175.435	38.0181
175.527	37.8966
175.619	37.7692
175.711	37.6879
175.803	37.6202
175.895	37.5801
175.987	37.6055
176.079	37.6046
176.171	37.5614
176.263	37.4566
176.355	37.3351
176.447	37.2537
176.539	37.2155
176.63	37.1998
176.722	37.143
176.815	37.091
176.907	37.0597
176.999	37.0136
177.091	36.9685
177.182	36.9352
177.274	36.896
177.367	36.8794
177.459	36.8647
177.551	36.8411
177.643	36.8225
177.734	36.7961
177.826	36.7794
177.918	36.7637
178.011	36.7618
178.103	36.7314
178.194	36.7098
178.286	36.7069
178.378	36.703
178.47	36.6932
178.563	36.6059
178.655	36.0728
178.746	33.5866
178.838	27.4302
178.93	18.4554
179.022	8.05168
179.115	2.401
179.206	1.4063
179.298	0.90454
179.39	0.37632
179.482	0
179.574	0.13622
179.666	0.95746
179.758	2.89786
179.85	9.10714
179.942	15.728
180.034	21.2121
180.126	26.8843
180.217	31.7608
180.31	35.4721
180.402	38.267
180.494	40.0742
180.586	41.111
180.678	41.6676
180.769	41.7882
180.861	41.6206
180.954	41.305
181.046	41.0424
181.138	40.7406
181.229	40.5152
181.321	40.3201
181.413	40.132
181.506	39.9144
181.598	39.8194
181.69	39.7341
181.781	39.6371
181.873	39.5312
181.965	39.4234
182.057	39.3235
182.15	39.2255
182.242	39.1598
182.333	39.1206
182.425	39.0373
182.517	38.9305
182.609	38.858
182.702	38.7972
182.793	38.7345
182.885	38.6522
182.977	38.5934
183.069	38.5542
183.161	38.5101
183.252	38.4493
183.345	38.3739
183.437	38.3013
183.529	38.2269
183.621	38.1347
183.713	38.0671
183.804	38.0211
183.897	37.9613
183.989	37.9035
184.081	37.8349
184.173	37.777
[truncated: 3,781 more rows]

## Sheet: S03-Right hand
Time/s	Force/N
0.404	0
0.496	0
0.588	0
0.68	0
0.773	0
0.864	0
0.956	0
1.048	0
1.14	0
1.232	0
1.325	0
1.416	0
1.508	0
1.6	0
1.692	0
1.784	0
1.875	0
1.968	0
2.06	0
2.152	0
2.244	0
2.336	0
2.427	0
2.52	0
2.612	0
2.704	0
2.796	0
2.888	0
2.979	0
3.072	0
3.164	0
3.256	0
3.348	0
3.439	0
3.531	0
3.623	0
3.716	0
3.808	0
3.9	0
3.991	0
4.083	0
4.175	0
4.268	0
4.36	0
4.451	0
4.543	0
4.635	0
4.727	0
4.819	0
4.911	0
5.003	0
5.095	0
5.187	0
5.279	0
5.371	0
5.463	0
5.555	0
5.647	0
5.739	0
5.831	0
5.922	0
6.014	0
6.107	0
6.199	0
6.291	1.93746
6.383	2.50194
6.474	3.86316
6.566	4.9833
6.659	6.0809
6.751	7.74004
6.843	10.8202
6.934	16.1847
7.026	23.2054
7.118	30.3486
7.211	35.4848
7.303	39.2461
7.395	42.337
7.486	44.9252
7.578	46.8411
7.67	47.7809
7.762	47.9779
7.855	47.8867
7.946	47.776
8.038	47.6731
8.13	47.63
8.222	47.6182
8.314	47.5927
8.406	47.5525
8.498	47.4761
8.59	47.4095
8.682	47.3585
8.774	47.3046
8.866	47.2556
8.957	47.235
9.05	47.2037
9.142	47.1625
9.234	47.1478
9.326	47.1223
9.417	47.1419
9.509	47.187
9.602	47.189
9.694	47.1223
9.786	47.0714
9.878	47.0214
9.969	46.9567
10.061	46.9302
10.153	46.8999
10.246	46.8871
10.338	46.8587
10.429	46.8185
10.521	46.8068
10.613	46.7744
10.705	46.6088
10.798	46.2276
10.889	45.4299
10.981	43.7864
11.073	41.2129
11.165	37.9681
11.257	32.9633
11.35	25.7201
11.441	16.9001
11.533	8.69946
11.625	3.13992
11.717	1.12896
11.809	0.71638
11.9	0.39592
11.993	0.294
12.085	0.30478
12.177	0.32928
12.269	0.37632
12.361	0.42532
12.452	0.58114
12.545	0.9016
12.637	2.07662
12.729	5.8653
12.821	11.7767
12.912	18.4906
13.004	25.3418
13.096	31.3708
13.189	36.0434
13.281	39.738
13.372	42.6614
13.464	44.8164
13.556	46.2687
13.648	47.2487
13.741	47.6868
13.833	47.8054
13.924	47.8436
14.016	47.8289
14.108	47.7191
14.2	47.5359
14.292	47.3418
14.384	47.1968
14.476	47.1027
14.568	47.0312
14.66	46.9724
14.752	46.942
14.843	46.942
14.936	46.9675
15.028	46.9675
15.12	46.99
15.212	47.0018
15.304	46.9665
15.395	46.8969
15.488	46.7264
15.58	46.552
15.672	46.4285
15.764	46.3393
15.855	46.2923
15.947	46.2442
16.039	46.2197
16.132	46.1315
16.224	46.0306
16.315	45.9414
16.407	45.8611
16.499	45.7905
16.591	45.8003
16.684	45.7513
16.776	45.373
16.867	44.151
16.959	41.6755
17.051	37.7947
17.143	31.9607
17.235	22.1921
17.327	12.3196
17.419	5.91822
17.511	2.22852
17.603	0.85652
17.695	0.41944
17.787	0.33026
17.879	0.17052
17.971	0.08232
18.063	0.16464
18.155	0.29302
18.247	0.50274
18.338	1.57878
18.43	4.79514
18.523	8.9376
18.615	13.4828
18.707	18.7856
18.798	24.1629
18.89	29.2971
18.982	33.8629
19.075	37.585
19.167	40.3956
19.258	42.4222
19.35	43.8697
19.442	44.7791
19.534	45.4916
19.627	46.0032
19.719	46.3128
19.81	46.6313
19.902	46.9018
19.994	46.9685
20.086	46.8616
20.178	46.7391
20.27	46.6705
20.362	46.6901
20.454	46.6245
20.546	46.4902
20.638	46.3413
20.73	46.2286
20.822	46.1923
20.914	46.1894
21.006	46.0933
21.098	45.9669
21.19	45.8601
21.281	45.8179
21.373	45.7689
21.466	45.668
21.558	45.5416
21.65	45.3662
21.741	45.2662
21.833	45.1937
21.925	45.1878
22.018	45.1192
22.11	45.0124
22.202	44.9369
22.293	44.8977
22.385	44.8673
22.477	44.8664
22.569	44.8409
22.662	44.7145
22.753	44.3156
22.845	43.2758
22.937	41.4481
23.029	38.5307
23.121	34.2716
23.213	28.9668
23.305	20.8593
23.397	12.0569
23.489	5.90744
23.581	2.68422
23.673	1.22206
23.764	0.76146
23.857	0.51058
23.949	0.4165
24.041	0.55468
24.133	1.09368
24.224	4.38648
24.316	10.8907
24.409	16.7854
24.501	22.6057
24.593	28.6719
24.684	33.6209
24.776	37.3968
24.868	40.1575
24.961	42.1331
25.053	43.4571
25.145	44.3724
25.236	45.0134
25.328	45.4544
25.42	45.6964
25.512	45.6758
25.605	45.523
25.696	45.3818
25.788	45.4406
25.88	45.5141
25.972	45.4602
26.064	45.3152
26.156	45.1956
26.248	45.0584
26.34	44.8781
26.432	44.737
26.524	44.688
26.616	44.7066
26.707	44.6625
26.8	44.64
26.892	44.6165
26.984	44.5322
27.076	44.4636
27.167	44.394
27.259	44.3244
27.352	44.247
27.444	44.197
27.536	44.1598
27.627	44.0941
27.719	43.9697
27.811	43.7658
27.904	43.5532
27.996	43.365
28.088	43.1837
28.179	42.9514
28.271	42.7535
28.363	42.632
28.455	42.532
28.548	42.4183
28.639	42.2821
28.731	42.1674
28.823	41.9714
28.915	41.6833
29.007	41.2423
29.099	40.4534
29.191	39.2872
29.283	37.7623
29.375	35.1271
29.467	31.2081
29.559	26.263
29.65	19.3383
29.743	11.4052
29.835	5.15382
29.927	1.87572
30.019	0.86044
30.11	0.51548
30.202	0.31066
30.295	0.21364
30.387	0.14602
30.479	0.42532
30.571	1.06722
30.662	4.66382
30.754	10.9672
30.846	15.78
30.939	21.2092
31.031	27.1323
31.122	32.1077
31.214	36.1404
31.306	39.3029
31.398	41.6549
31.491	43.3258
31.582	44.4058
31.674	45.2152
31.766	45.7327
31.858	45.9885
31.95	45.9728
32.041	45.7768
32.134	45.4661
32.226	45.1898
32.318	45.0555
32.41	45.0075
32.502	44.8967
32.593	44.7292
32.686	44.542
32.778	44.3862
32.87	44.3048
32.962	44.2597
33.053	44.2088
33.145	44.0628
33.238	43.8717
33.33	43.7413
33.422	43.6688
33.514	43.5835
33.605	43.5189
33.697	43.4826
33.789	43.4385
33.882	43.3758
33.974	43.3219
34.065	43.2641
34.157	43.2062
34.249	43.1602
34.341	43.1396
34.434	43.0965
34.525	43.0592
34.617	43.0583
34.709	43.0328
34.801	43.0044
34.893	42.9828
34.985	42.9348
35.077	42.8681
35.169	42.7545
35.261	42.6339
35.353	42.5144
35.445	42.2919
35.536	41.9244
35.629	41.2168
35.721	39.5234
35.813	36.358
35.905	31.8235
35.997	25.1341
36.088	16.3023
36.18	8.0213
36.273	2.60876
36.365	0.9702
36.457	0.5586
36.548	0.294
36.64	0.11858
36.732	0.147
36.825	0.51548
36.917	2.2491
37.008	8.183
37.1	14.653
37.192	20.432
37.284	26.4708
37.377	32.2342
37.469	36.9627
37.56	40.3672
37.652	42.4193
37.744	43.5002
37.836	43.906
37.928	44.0206
38.02	44.1372
38.112	44.2196
38.204	44.148
38.296	43.9559
38.388	43.8619
38.48	43.8207
38.572	43.7394
38.664	43.6365
38.756	43.5737
38.848	43.5639
38.94	43.5473
39.031	43.4885
39.123	43.4062
39.216	43.2925
39.308	43.2151
39.4	43.2621
39.491	43.2817
39.583	43.1906
39.675	43.1269
39.768	43.0583
39.86	43.0053
39.952	42.9563
40.043	42.922
40.135	42.9034
40.227	42.8613
40.32	42.8338
40.412	42.7946
40.503	42.7692
40.595	42.7104
40.687	42.6633
40.779	42.5849
40.871	42.5016
40.964	42.4585
41.055	42.4066
41.147	42.3772
41.239	42.3478
41.331	42.3095
41.423	42.2605
41.515	42.1645
41.607	41.9734
41.699	41.5324
41.791	40.5945
41.883	38.8648
41.974	35.866
42.066	31.5472
42.159	25.4065
42.251	16.905
42.343	8.32216
42.434	2.94
42.526	1.11328
42.618	0.64974
42.711	0.3528
42.803	0.31556
42.895	0.34496
42.986	0.7546
43.078	3.25164
43.17	8.29962
43.262	12.3803
43.355	17.397
43.446	23.7699
43.538	29.7479
43.63	34.494
43.722	37.8035
43.814	39.9301
43.906	41.4756
43.998	42.6819
44.09	43.3993
44.182	43.7394
44.274	43.905
44.366	43.9393
44.457	43.8981
44.55	43.7266
44.642	43.4405
44.734	43.2219
44.826	43.1004
44.917	42.9857
45.009	42.9093
45.102	42.8544
45.194	42.8299
45.286	42.8231
45.377	42.8211
45.469	42.8133
45.561	42.8113
45.654	42.8417
45.746	42.7976
45.837	42.7466
45.929	42.6761
46.021	42.582
46.113	42.5251
46.205	42.4791
46.298	42.436
46.389	42.4066
46.481	42.338
46.573	42.2645
46.665	42.2351
46.757	42.1782
46.849	42.139
46.941	42.1518
47.033	42.14
47.125	42.0449
47.217	41.9695
47.308	41.8646
47.4	41.7784
47.493	41.7343
47.585	41.7382
47.677	41.7402
47.769	41.7215
47.86	41.5108
47.952	40.8033
48.045	39.3176
48.137	36.8441
48.229	32.8437
48.32	26.4825
48.412	17.1373
48.504	8.44172
48.596	3.34964
48.689	1.20442
48.78	0.73304
48.872	0.38416
48.964	0.32242
49.056	0.39102
49.148	0.89278
49.24	4.13266
49.332	11.6738
49.424	18.1937
49.516	23.7121
49.608	29.0962
49.7	33.9835
49.792	38.0054
49.884	40.8425
49.976	42.3213
50.068	42.8211
50.16	42.9514
50.251	43.1474
50.343	43.4512
50.436	43.8609
50.528	44.396
50.62	44.6998
50.712	44.7507
50.803	44.6566
50.895	44.5214
50.988	44.4136
51.08	44.3303
51.172	44.2588
51.263	44.2176
51.355	44.1735
51.447	44.0628
51.539	43.9481
51.632	43.8011
51.723	43.6404
51.815	43.5855
51.907	43.5865
51.999	43.5924
52.091	43.5639
52.183	43.4748
52.275	43.4395
52.367	43.4601
52.459	43.4336
52.551	43.3464
52.643	43.2396
52.734	43.2209
52.827	43.2151
52.919	43.1896
53.011	43.2347
53.103	43.2151
53.194	43.1122
53.286	43.0416
53.379	42.9828
53.471	42.9436
53.563	42.9289
53.654	42.8907
53.746	42.8133
53.838	42.7211
53.931	42.5496
54.023	42.1949
54.115	41.6196
54.206	40.7768
54.298	39.6341
54.39	37.8603
54.482	34.5254
54.575	30.0782
54.666	24.1609
54.758	16.123
54.85	8.31726
54.942	3.12326
55.034	1.0976
55.126	0.70364
55.218	0.35476
55.31	0.23128
55.402	0.09898
55.494	0.17346
55.586	0.39984
55.677	0.78792
55.77	2.87042
55.862	8.89742
55.954	15.0851
56.046	21.0396
56.137	27.1568
56.229	32.5272
56.322	36.5903
56.414	39.6028
56.506	41.9185
56.597	43.71
56.689	44.8967
56.781	45.4014
56.873	45.5759
56.966	45.5886
57.057	45.5024
57.149	45.3456
57.241	45.2858
57.333	45.3642
57.425	45.3642
57.518	45.2956
57.609	45.2172
57.701	45.129
57.793	45.0388
57.885	45.0183
57.977	44.9663
58.068	44.8536
58.161	44.737
58.253	44.6527
58.345	44.5733
58.437	44.4636
58.528	44.3283
58.62	44.2264
58.713	44.1372
58.805	44.1
58.897	44.052
58.989	43.9452
59.08	43.8589
59.172	43.757
59.265	43.6433
59.357	43.5747
59.449	43.5198
59.54	43.4542
59.632	43.3885
59.724	43.2915
59.816	43.2327
59.909	43.1504
60	43.0759
60.092	43.0102
60.184	42.9436
60.276	42.8926
60.368	42.8446
60.461	42.8113
60.552	42.7456
60.644	42.6124
60.736	42.3987
60.828	41.9901
60.92	41.2952
61.011	40.1555
61.104	38.0779
61.196	34.8008
61.288	30.3222
61.38	23.8552
61.471	15.387
61.563	8.35254
61.656	3.73184
61.748	1.45334
61.84	0.73206
61.932	0.35574
62.023	0.25872
62.115	0.19208
62.208	0.26264
62.3	0.55664
62.392	2.22068
62.483	8.27708
62.575	14.6422
62.667	20.04
62.759	26.605
62.852	33.4954
62.943	38.7002
63.035	41.6882
63.127	43.2337
63.219	44.0726
63.311	44.4205
63.403	44.5616
63.495	44.6047
63.587	44.6645
63.679	44.737
63.771	44.7252
63.863	44.641
63.954	44.4793
64.047	44.2646
64.139	44.1108
64.231	43.9883
64.323	43.9128
64.414	43.857
64.506	43.7844
64.599	43.7031
64.691	43.6051
64.783	43.4846
64.875	43.3336
64.966	43.2464
65.058	43.1808
65.15	43.0749
65.243	42.9848
65.335	42.8515
65.426	42.7388
65.518	42.7113
65.61	42.7074
65.702	42.6908
65.795	42.629
65.886	42.5477
65.978	42.4908
66.07	42.4291
66.162	42.3429
66.254	42.2743
66.345	42.238
66.438	42.2478
66.53	42.2233
66.622	42.1243
66.714	42.0273
66.806	41.9322
66.897	41.8774
66.99	41.8176
67.082	41.7617
67.174	41.7607
67.266	41.7372
67.357	41.6716
67.449	41.6265
67.542	41.6774
67.634	41.7215
67.726	41.6039
67.818	41.2717
67.909	40.1937
68.001	37.6447
68.093	33.5248
68.186	28.1995
68.278	21.2817
68.369	12.4019
68.461	5.98976
68.553	2.50978
68.645	1.01136
68.738	0.70952
68.829	0.39984
68.921	0.27048
69.013	0.15582
69.105	0.27636
69.197	0.57134
69.289	1.68364
69.381	7.10304
69.473	14.6089
69.565	20.4957
69.657	26.4149
69.749	31.6638
69.84	35.4829
69.933	38.2719
70.025	40.5171
70.117	42.3536
70.209	43.5424
70.3	43.8893
70.392	43.8717
70.484	43.7168
70.577	43.4846
70.669	43.2268
70.761	43.0377
70.852	42.8828
70.944	42.7554
71.036	42.6486
71.129	42.4673
71.221	42.2302
71.312	42.0048
71.404	41.8568
71.496	41.7304
71.588	41.5677
71.681	41.4315
71.772	41.2903
71.864	41.1767
71.956	41.1394
72.048	41.1247
72.14	41.1002
72.232	41.0502
72.324	40.9787
72.416	40.8827
72.508	40.7856
72.6	40.7151
72.692	40.6906
72.783	40.6484
72.876	40.6083
72.968	40.5769
73.06	40.5455
73.152	40.5132
73.243	40.4544
73.335	40.4191
73.427	40.4377
73.52	40.4524
73.612	40.3976
73.704	40.3074
73.795	40.1986
73.887	39.9575
73.979	39.2813
74.072	37.7525
74.164	35.6798
74.255	32.83
74.347	27.0725
74.439	18.0536
74.531	9.898
74.624	4.7187
74.715	1.76694
74.807	0.93982
74.899	0.48706
74.991	0.26656
75.083	0.29008
75.175	0.3136
75.267	0.82614
75.359	4.71086
75.451	12.9046
75.543	19.0267
75.635	24.5529
75.726	30.4261
75.819	35.0909
75.911	38.1828
76.003	40.1545
76.095	41.2129
76.186	41.8088
76.278	42.3076
76.37	42.7211
76.463	43.0994
76.555	43.4062
76.646	43.3356
76.738	43.0612
76.83	42.6888
76.922	42.2772
77.015	41.8921
77.107	41.5814
77.198	41.3168
77.29	41.1375
77.382	40.9552
77.474	40.7464
77.566	40.5691
77.658	40.4417
77.75	40.3809
77.842	40.3309
77.934	40.3554
78.026	40.3427
78.117	40.2564
78.21	40.2016
78.302	40.1408
78.394	40.082
78.486	40.0301
78.578	39.9879
78.669	39.9419
78.761	39.8987
78.854	39.8791
78.946	39.839
79.038	39.7282
79.129	39.6008
79.221	39.5675
79.313	39.639
79.406	39.64
79.498	39.5371
79.589	39.4685
79.681	39.3931
79.773	39.3225
79.865	39.2784
79.958	39.2176
80.05	39.1941
80.141	39.1392
80.233	39.1059
80.325	39.0902
80.417	39.0599
80.509	38.9873
80.601	38.8345
80.693	38.4581
80.785	37.4997
80.877	35.7073
80.969	32.9476
81.06	27.98
81.153	20.4967
81.245	12.2598
81.337	5.55072
81.429	2.26282
81.521	0.87906
81.612	0.68502
81.704	0.61544
81.797	0.70952
81.889	2.21088
81.981	7.3892
82.072	13.427
82.164	18.8405
82.256	25.1331
82.349	31.3041
82.441	35.8592
82.532	38.709
82.624	40.3211
82.716	41.2619
82.808	41.9783
82.9	42.5624
82.993	42.875
83.084	42.8623
83.176	42.6329
83.268	42.3095
83.36	42.1047
83.452	41.9754
83.544	41.8411
83.636	41.7823
83.728	41.8636
83.82	41.9538
83.912	41.943
84.003	41.8391
84.096	41.6108
84.188	41.3462
84.28	41.111
84.372	40.8337
84.464	40.5789
84.555	40.3544
84.647	40.1751
84.74	40.0742
84.832	39.9879
84.924	39.9183
85.015	39.8791
85.107	39.8772
85.199	39.8184
85.292	39.7067
85.384	39.5459
85.475	39.4058
85.567	39.3411
85.659	39.2813
85.751	39.2127
85.843	39.1118
85.936	39.051
86.027	39.0197
86.119	38.9932
86.211	38.9815
86.303	38.9119
86.395	38.8364
86.487	38.7776
86.579	38.7247
86.671	38.6904
86.763	38.6385
86.855	38.5689
86.947	38.4895
87.038	38.4101
87.131	38.3415
87.223	38.2661
87.315	38.1485
87.407	38.023
87.498	37.9309
87.59	37.8143
87.683	37.6242
87.775	37.2782
87.867	36.5961
87.958	35.6083
88.05	34.1628
88.142	30.9651
88.235	25.088
88.327	18.3015
88.419	11.416
88.51	5.46644
88.602	2.32554
88.694	1.0633
88.786	0.7742
88.879	0.49784
88.97	0.32732
89.062	0.28224
89.154	0.39396
89.246	0.6125
89.338	1.78556
89.43	6.32394
89.522	12.5371
89.614	18.5053
89.706	24.7303
89.798	30.378
89.889	35.036
89.981	38.4719
90.074	40.8758
90.166	42.2194
90.258	42.7564
90.35	42.9015
90.441	42.9309
90.533	42.8868
90.626	42.8681
90.718	42.8642
90.81	42.7711
90.901	42.4536
90.993	41.9989
91.085	41.6
91.177	41.2854
91.27	41.0453
91.361	40.8533
91.453	40.6112
91.545	40.4975
91.637	40.6181
91.729	40.7954
91.822	40.8111
91.913	40.6563
92.005	40.3936
92.097	40.1526
92.189	40.081
92.281	40.3211
92.372	40.6132
92.465	40.8043
92.557	40.7121
92.649	40.525
92.741	40.3829
92.833	40.3064
92.924	40.2339
93.017	40.1594
93.109	40.0712
93.201	39.9781
93.293	39.9742
93.384	39.9556
93.476	39.8399
93.569	39.7351
93.661	39.6586
93.753	39.5959
93.844	39.5361
93.936	39.4852
94.028	39.4362
94.12	39.3294
94.213	39.0599
94.304	38.4033
94.396	36.7392
94.488	33.6659
94.58	29.2197
94.672	22.4371
94.765	14.5412
94.856	8.6632
94.948	4.70792
95.04	2.22656
95.132	1.13386
95.224	0.70266
95.315	0.44884
95.408	0.30478
95.5	0.22442
95.592	0.18424
95.684	0.18816
95.775	0.23814
95.867	0.23128
95.96	0.25382
96.052	0.31556
96.144	0.41356
96.236	0.77616
96.327	2.41472
96.419	6.39646
96.512	9.46582
96.604	13.5132
96.696	19.7264
96.787	26.5815
96.879	32.3802
96.971	36.6314
97.063	39.839
97.156	42.2674
97.247	43.902
97.339	44.5978
97.431	44.6233
97.523	44.4283
97.615	44.1774
97.708	43.9197
97.799	43.6717
97.891	43.4718
97.983	43.3111
98.075	43.1719
98.167	43.0406
98.258	42.8877
98.351	42.7143
98.443	42.5692
98.535	42.3919
98.627	42.1596
98.718	41.946
98.81	41.8362
98.903	41.7333
98.995	41.6921
99.087	41.6931
99.179	41.5814
99.27	41.452
99.362	41.3589
99.454	41.2502
99.547	41.1208
99.639	41.0022
99.73	40.8591
99.822	40.7131
99.914	40.5691
100.006	40.4348
100.099	40.3613
100.191	40.3672
100.282	40.278
100.374	40.2153
100.466	40.1526
100.558	40.0291
100.651	39.9066
100.742	39.7939
100.834	39.786
100.926	39.7723
101.018	39.7684
101.11	39.7292
101.201	39.6822
101.294	39.6616
101.386	39.639
101.478	39.6077
101.57	39.5587
101.661	39.4577
101.753	39.3343
101.846	39.1824
101.938	39.006
102.03	38.7247
102.122	38.0211
102.213	36.7431
102.305	35.2957
102.397	33.4954
102.49	31.2806
102.582	28.0084
102.673	23.0702
102.765	17.0246
102.857	10.2871
102.949	4.88628
103.042	1.76302
103.133	0.7987
103.225	0.50764
103.317	0.2842
103.409	0.17248
103.501	0.21952
103.593	0.44002
103.685	1.3181
103.777	5.6252
103.869	12.8096
103.961	18.5122
104.053	24.3422
104.144	30.3075
104.237	34.8321
104.329	38.0573
104.421	40.5779
104.513	42.5418
104.604	43.6913
104.696	44.1539
104.788	44.4381
104.881	44.5753
104.973	44.5969
105.065	44.5341
105.156	44.2842
105.248	43.9706
105.34	43.757
105.433	43.6296
105.525	43.4963
105.616	43.3748
105.708	43.2905
105.8	43.1386
105.892	42.9603
105.985	42.7956
106.076	42.6565
106.168	42.5389
106.26	42.3987
106.352	42.2351
106.444	42.0655
106.536	41.9185
106.628	41.8284
106.72	41.747
106.812	41.7019
106.904	41.6422
106.996	41.5255
107.087	41.4324
107.18	41.3021
107.272	41.1639
107.364	41.0689
107.456	40.9405
107.548	40.8043
107.639	40.7288
107.731	40.6092
107.824	40.4544
107.916	40.3642
108.008	40.2996
108.099	40.2545
108.191	40.231
108.283	40.2408
108.376	40.2662
108.468	40.279
108.56	40.2898
108.651	40.2849
108.743	40.2555
108.835	40.2359
108.928	40.1996
109.02	40.1771
109.111	40.1692
109.203	40.1457
109.295	40.0722
109.387	40.0183
109.479	40.0154
109.571	40.0301
109.663	40.0791
109.755	40.1281
109.847	39.9615
109.939	39.299
110.031	37.5017
110.123	35.2653
110.215	32.7839
110.307	28.7669
110.399	22.7478
110.491	16.0622
110.582	9.6775
110.674	4.63344
110.767	1.84534
110.859	0.833
110.951	0.60466
111.043	0.3724
111.134	0.21952
111.226	0.08428
111.319	0
111.411	0
111.503	0.06664
111.594	0.28518
111.686	0.83202
111.778	4.34826
111.87	12.838
111.963	18.7611
112.055	23.1741
112.146	28.3122
112.238	33.0946
112.33	36.6579
112.422	39.25
112.515	41.2335
112.606	42.6525
112.698	43.4806
112.79	43.8579
112.882	44.0941
112.974	44.3156
113.067	44.4273
113.158	44.4401
113.25	44.347
113.342	44.148
113.434	43.9334
113.526	43.759
113.617	43.6041
113.71	43.4708
113.802	43.3836
113.894	43.3091
113.986	43.1945
114.077	43.0896
114.169	43.0426
114.262	42.9779
114.354	42.9426
114.446	42.8907
114.538	42.7907
114.629	42.6447
114.721	42.4801
114.813	42.3654
114.906	42.2958
114.998	42.2321
115.089	42.1939
115.181	42.1312
115.273	41.9773
115.365	41.8646
115.458	41.7892
115.549	41.7402
115.641	41.6823
115.733	41.599
115.825	41.4903
115.917	41.4079
116.009	41.3678
116.101	41.2864
116.193	41.2227
116.285	41.161
116.377	41.0914
116.469	41.0571
116.56	41.061
116.653	41.062
116.745	41.0179
116.837	40.9611
116.929	40.9062
117.021	40.8738
117.112	40.8572
117.204	40.8425
117.297	40.817
117.389	40.7572
117.481	40.7131
117.572	40.6288
117.664	40.5299
117.756	40.5426
117.849	40.5769
117.941	40.3907
118.032	39.8772
118.124	38.3631
118.216	35.3555
118.308	31.1395
118.401	25.4428
118.493	17.248
118.584	9.3198
118.676	4.46586
118.768	1.58564
118.86	0.94374
118.952	0.50666
119.044	0.2793
119.136	0.27048
119.228	0.26264
119.32	0.37534
119.412	0.8281
119.503	4.26986
119.596	11.7678
119.688	17.5273
119.78	23.1741
119.872	29.3118
119.964	34.3363
120.055	37.6751
120.147	39.8909
120.24	41.5108
120.332	42.8074
120.424	43.7903
120.515	44.3234
120.607	44.4518
120.699	44.4469
120.792	44.3881
120.884	44.2578
120.975	44.053
121.067	43.8207
121.159	43.6561
121.251	43.5463
121.344	43.4365
121.436	43.3082
121.527	43.1523
121.619	43.0622
121.711	42.9906
121.803	42.9073
121.895	42.8623
121.987	42.8456
122.079	42.7937
122.171	42.7035
122.263	42.6486
122.355	42.5888
122.447	42.5075
122.539	42.433
122.631	42.3879
122.723	42.3968
122.815	42.3625
122.907	42.2713
122.998	42.1508
123.09	42.0057
123.183	41.8989
123.275	41.8156
123.367	41.7598
123.459	41.6627
123.55	41.5265
123.642	41.3893
123.735	41.3109
123.827	41.2776
123.919	41.2188
124.01	41.1541
124.102	41.063
124.194	40.9542
124.286	40.8944
124.379	40.8307
124.47	40.7807
124.562	40.72
124.654	40.6769
124.746	40.6671
124.838	40.6612
124.931	40.6357
125.022	40.5426
125.114	40.3515
125.206	40.031
125.298	39.4254
125.39	38.3151
125.481	36.5481
125.574	33.8629
125.666	29.839
125.758	24.8146
125.85	17.8115
125.942	10.2459
126.033	4.7775
126.126	1.5386
126.218	0.89964
126.31	0.5439
126.402	0.31262
126.493	0.24892
126.585	0.39298
126.678	0.89278
126.77	4.40412
126.862	13.3692
126.954	21.2376
127.045	26.7569
127.137	31.5511
127.229	35.671
127.322	38.8021
127.414	41.11
127.505	42.5428
127.597	43.2572
127.689	43.6864
127.781	43.955
127.874	44.1284
127.965	44.3127
128.057	44.3764
128.149	44.3332
128.241	44.347
128.333	44.3744
128.425	44.3117
128.517	44.1029
128.609	43.8922
128.701	43.7609
128.793	43.6708
128.885	43.5757
128.976	43.4463
129.069	43.2748
129.161	43.0916
129.253	42.9554
129.345	42.8201
129.437	42.681
129.528	42.483
129.62	42.2792
129.713	42.1155
129.805	41.9558
129.897	41.7941
129.988	41.6177
130.08	41.5069
130.172	41.3756
130.265	41.2541
130.357	41.2237
130.448	41.1894
130.54	41.0953
130.632	41.0199
130.724	40.9503
130.817	40.865
130.909	40.7807
131	40.6729
131.092	40.5877
131.184	40.5436
131.276	40.5005
131.368	40.3966
131.46	40.2702
131.552	40.133
131.644	40.0007
131.736	39.937
131.828	39.8723
131.92	39.7821
132.012	39.7027
132.104	39.639
132.196	39.5704
132.288	39.4744
132.38	39.2451
132.471	38.7982
132.563	37.9348
132.656	36.1806
132.748	33.1005
132.84	28.8228
132.931	22.4645
133.023	15.1635
133.115	8.67006
133.208	3.67696
133.3	1.39748
133.392	0.70364
133.483	0.50372
133.575	0.3234
133.667	0.20678
133.76	0.2009
133.852	0.39886
133.943	0.80556
134.035	3.28594
134.127	9.98718
134.219	15.8956
134.311	20.8466
134.404	26.4277
134.495	32.2185
134.587	36.7108
134.679	39.7174
134.771	41.9616
134.863	43.4561
134.955	43.9677
135.047	44.0118
135.139	43.9648
135.231	43.8726
135.323	43.7746
135.414	43.6188
135.506	43.4561
135.599	43.3072
135.691	43.1906
135.783	43.0837
135.875	42.8505
135.966	42.6241
136.058	42.4213
136.151	42.2831
136.243	42.2057
136.335	42.1831
136.426	42.2801
136.518	42.2645
136.61	42.0979
136.702	41.9087
136.795	41.7245
136.887	41.6275
136.978	41.5608
137.07	41.4756
137.162	41.3668
137.254	41.2482
137.347	41.1316
137.438	41.063
137.53	41.0218
137.622	40.962
137.714	40.8072
137.806	40.6347
137.897	40.5103
137.99	40.3652
138.082	40.2417
138.174	40.1261
138.266	40.0399
138.358	40.0163
138.449	40.0026
138.542	39.982
138.634	39.9477
138.726	39.8556
138.818	39.6792
138.909	39.3823
139.001	38.8325
139.094	37.7614
139.186	36.0023
139.278	33.3269
139.37	29.2844
139.461	23.4004
139.553	16.0112
139.645	8.64556
139.738	3.55054
139.83	1.25832
139.921	0.73696
140.013	0.53704
140.105	0.40376
140.197	0.42434
140.29	0.7105
140.382	1.89238
140.473	6.56894
140.565	13.4368
140.657	19.651
140.749	25.3791
140.841	30.3967
140.933	34.4441
141.025	37.585
141.117	39.8987
141.209	41.5363
141.301	42.7123
141.393	43.2837
141.485	43.364
141.577	43.2797
141.669	43.1847
141.761	43.119
141.853	43.1631
141.944	43.2415
142.036	43.2435
142.129	43.1327
142.221	42.9211
142.313	42.7045
142.404	42.482
142.496	42.334
142.588	42.1978
142.681	42.042
142.773	41.9313
142.865	41.8068
142.956	41.7274
143.048	41.6471
143.14	41.504
143.233	41.3981
143.325	41.3031
143.416	41.211
143.508	41.1081
143.6	40.9562
143.692	40.8141
143.784	40.6308
143.877	40.4201
143.968	40.2682
144.06	40.133
144.152	39.9575
144.244	39.8252
144.336	39.7527
144.428	39.6733
144.52	39.69
144.612	39.7076
144.704	39.6459
144.796	39.5499
144.887	39.4136
144.979	39.3235
145.072	39.2559
145.164	39.2294
145.256	39.2167
145.348	39.202
145.439	39.1579
145.531	39.0618
145.624	38.954
145.716	38.8178
145.808	38.6914
145.899	38.5993
145.991	38.563
146.083	38.5101
146.176	38.4287
146.268	38.2739
146.36	37.976
146.451	37.3066
146.543	36.0101
146.635	33.7884
146.727	30.3829
146.82	26.0964
146.911	20.1165
147.003	12.3803
147.095	6.17988
147.187	2.6754
147.279	1.22598
147.372	0.7791
147.463	0.55566
147.555	0.39984
147.647	0.26166
147.739	0.245
147.831	0.5047
147.922	1.72578
148.015	7.73514
148.107	16.172
148.199	21.3562
148.291	25.8573
148.383	30.7622
148.474	34.8008
148.567	37.8447
148.659	40.228
148.751	41.8411
148.843	42.8231
148.934	43.3189
149.026	43.3924
149.118	43.2954
149.211	43.1612
149.303	42.9436
149.395	42.6761
149.486	42.4134
149.578	42.1919
149.67	41.8597
149.763	41.4707
149.855	41.2404
149.946	41.0355
150.038	40.7807
150.13	40.4074
150.222	40.0977
150.315	39.9801
150.407	39.9036
150.498	39.8752
150.59	39.7762
150.682	39.7125
150.774	39.6773
150.866	39.639
150.958	39.6106
151.05	39.4656
151.142	39.2588
151.234	39.0501
151.326	38.8433
151.417	38.5914
151.51	38.3788
151.602	38.2445
151.694	38.1289
151.786	37.9975
151.878	38.0838
151.969	38.2004
152.061	38.2131
152.154	38.1857
152.246	38.1504
152.338	38.1828
152.429	38.2553
152.521	38.2984
152.613	38.268
152.706	38.2102
152.798	38.1289
152.89	38.0465
152.981	37.9858
153.073	37.8966
153.165	37.7986
153.257	37.7182
153.35	37.6281
153.441	37.5712
153.533	37.5301
153.625	37.4468
153.717	37.2224
153.809	36.8264
153.902	36.2953
153.993	35.6142
154.085	34.3578
154.177	32.0431
154.269	28.3122
154.361	22.7899
154.452	16.2817
154.545	9.43936
154.637	3.69362
154.729	1.44648
154.821	0.74382
154.913	0.42042
155.004	0.22834
155.097	0.25578
155.189	0.27048
155.281	0.42826
155.373	1.0241
155.464	4.51486
155.556	10.7085
155.649	15.2165
155.741	21.0073
155.833	27.6625
155.924	32.9192
156.016	36.3845
156.108	38.807
156.2	40.5642
156.293	41.749
156.385	42.4222
156.476	42.8554
156.568	43.1808
156.66	43.4287
156.752	43.6149
156.845	43.7051
156.936	43.6766
157.028	43.5483
157.12	43.315
157.212	43.0308
157.304	42.7868
157.396	42.632
157.488	42.6006
157.58	42.5908
157.672	42.5692
157.764	42.4899
157.856	42.3909
157.947	42.2801
158.04	42.1273
158.132	41.9607
158.224	41.7705
158.316	41.6951
158.408	41.798
158.499	41.9332
158.592	41.9322
158.684	41.847
158.776	41.7215
158.868	41.6186
158.959	41.5549
159.051	41.4579
159.143	41.354
159.236	41.257
159.328	41.1571
159.419	41.1473
159.511	41.1551
159.603	41.11
159.695	41.0257
159.788	40.9562
159.88	40.8768
159.971	40.7464
160.063	40.6406
160.155	40.5553
160.247	40.5142
160.339	40.5181
160.431	40.4701
160.523	40.423
160.615	40.2917
160.707	40.0565
160.799	39.7743
160.89	39.2813
160.983	38.5895
161.075	37.5781
161.167	35.7151
161.259	33.0201
161.351	29.5294
161.442	23.6131
161.534	15.0861
161.627	7.79492
161.719	3.64462
161.811	1.37984
161.902	0.84574
161.994	0.6272
162.086	0.46158
162.179	0.34496
162.271	0.38612
162.363	0.63112
162.454	1.99528
162.546	7.38626
162.638	13.621
162.731	18.1026
162.823	23.5406
162.914	29.6234
163.006	34.2931
163.098	37.5771
163.19	40.0653
163.282	42.0116
163.374	43.2376
163.466	43.7541
163.558	43.8178
163.65	43.7933
163.742	43.7746
163.834	43.7923
163.926	43.759
164.018	43.5924
164.11	43.363
164.202	43.0739
164.294	42.826
164.385	42.6947
164.477	42.5967
164.57	42.5144
164.662	42.4262
164.754	42.335
164.845	42.2017
164.937	42.0175
165.029	41.8401
165.122	41.6921
165.214	41.602
165.306	41.4765
165.397	41.306
165.489	41.1424
165.581	41.0267
165.673	40.9277
165.766	40.8631
165.857	40.8631
165.949	40.8337
166.041	40.8552
166.133	41.0042
166.225	41.0757
166.317	41.0248
166.409	40.868
166.501	40.6955
166.593	40.5808
166.685	40.475
166.777	40.3976
166.868	40.2623
166.961	40.1457
167.053	40.0487
167.145	39.9419
167.237	39.8429
167.328	39.7704
167.42	39.6978
167.513	39.6498
167.605	39.5989
167.697	39.5254
167.789	39.4362
167.88	39.3519
167.972	39.1902
168.065	38.7031
168.157	37.4948
168.249	35.2349
168.34	31.2346
168.432	24.1305
168.524	15.7212
168.616	8.57108
168.709	3.40942
168.8	1.20834
168.892	0.65758
168.984	0.47726
169.076	0.32536
169.168	0.35378
169.261	0.5537
169.352	1.05448
169.444	3.8759
169.536	10.1107
169.628	16.3797
169.72	22.1098
169.811	27.6546
169.904	32.1303
169.996	35.4868
170.088	38.1406
170.18	40.3446
170.271	42.0969
170.363	43.2249
170.456	43.6237
170.548	43.6668
170.64	43.6041
170.731	43.4228
170.823	43.2278
170.915	43.0886
171.008	42.9857
171.1	42.826
171.192	42.5604
171.283	42.3174
171.375	42.0587
171.467	41.8568
171.559	41.7196
171.652	41.602
171.743	41.4168
171.835	41.2541
171.927	41.1394
172.019	41.063
172.111	40.9503
172.204	40.7543
172.295	40.5808
172.387	40.4328
172.479	40.3025
172.571	40.2506
172.663	40.1271
172.754	39.9507
172.847	39.7596
172.939	39.5342
173.031	39.3989
173.123	39.3058
173.215	39.1971
173.306	39.0657
173.399	38.9001
173.491	38.7766
173.583	38.6541
173.675	38.5238
173.766	38.464
173.858	38.3827
173.95	38.3396
174.043	38.3454
174.135	38.3699
174.226	38.368
174.318	38.2621
174.41	38.1122
174.502	37.9583
174.595	37.827
174.687	37.7339
174.778	37.6741
174.87	37.6604
174.962	37.6055
175.054	37.4987
175.147	37.3792
175.238	37.3311
175.33	37.3419
175.422	37.3115
175.514	37.242
175.606	37.1028
175.698	36.944
175.79	36.7412
175.882	36.5334
175.974	36.3962
176.066	36.1571
176.158	35.7034
176.249	34.9301
176.342	33.3768
176.434	30.7544
176.526	25.9132
176.618	18.5338
176.709	11.0642
176.801	4.7432
176.893	1.56604
176.986	0.71736
177.078	0.41356
177.17	0.32438
177.261	0.26068
177.353	0.3234
177.445	0.6125
177.538	2.56662
177.63	8.37312
177.721	14.1875
177.813	20.2733
177.905	27.3783
177.997	33.4337
178.089	37.4174
178.182	40.0477
178.273	41.8254
178.365	42.8554
178.457	43.0161
178.549	42.7437
178.641	42.3899
178.733	42.0312
178.825	41.7627
178.917	41.599
179.009	41.5069
179.101	41.3825
179.192	41.2649
179.284	41.109
179.377	40.9934
179.469	40.9091
179.561	40.8062
179.653	40.6778
179.744	40.574
179.836	40.4534
179.929	40.325
180.021	40.1751
180.113	40.0095
180.204	39.8762
180.296	39.7772
180.388	39.6498
180.481	39.4969
180.573	39.3735
180.664	39.2627
180.756	39.1912
180.848	39.1206
180.94	39.0618
181.032	39.0167
181.125	38.9364
181.216	38.8178
181.308	38.6414
181.4	38.5326
181.492	38.4856
181.584	38.4366
181.676	38.3562
181.768	38.2523
181.86	38.1583
181.952	38.0995
182.044	38.0563
182.135	37.9848
182.227	37.8937
182.32	37.7957
182.412	37.7006
182.504	37.6771
182.596	37.6918
182.687	37.6722
182.779	37.5987
182.872	37.5213
182.964	37.4536
183.056	37.3586
183.147	37.3027
183.239	37.2821
183.331	37.2802
183.424	37.3184
183.516	37.3654
183.607	37.3066
183.699	37.1841
183.791	37.0714
183.883	36.9754
183.975	36.8529
184.068	36.5726
184.159	35.8768
[truncated: 3,606 more rows]

## Sheet: S04-Left hand
Time/s	Force/N
0	0.1617
0.092	0.20286
0.184	0.20972
0.275	0.20678
0.367	0.2499
0.459	0.29988
0.551	0.30086
0.644	0.32536
0.735	0.39788
0.827	0.5096
0.919	0.73402
1.011	0.86632
1.103	0.9996
1.195	1.57388
1.287	2.7636
1.379	5.68106
1.471	12.0295
1.563	21.363
1.654	33.8257
1.746	47.5574
1.839	62.0928
1.931	75.4041
2.023	83.6469
2.114	85.7765
2.206	85.209
2.298	84.6965
2.391	84.2712
2.483	83.8312
2.574	83.546
2.666	83.3461
2.758	83.154
2.85	82.9815
2.943	82.8708
3.034	82.9619
3.126	83.0942
3.218	83.25
3.31	83.3147
3.402	83.2059
3.493	82.9962
3.586	82.7247
3.678	82.5199
3.77	82.3171
3.862	82.1897
3.953	82.1544
4.045	82.1289
4.138	82.0407
4.23	81.8859
4.322	81.9113
4.413	81.8898
4.505	81.7594
4.597	81.8271
4.689	81.8202
4.782	81.7134
4.873	81.5605
4.965	81.4684
5.057	81.5066
5.149	81.5615
5.241	81.5448
5.333	81.3204
5.425	80.1846
5.517	76.9378
5.609	71.4508
5.701	62.7082
5.792	50.9473
5.884	33.2984
5.977	14.5991
6.069	5.0078
6.161	1.0192
6.252	0.80752
6.344	0.3724
6.436	0.0686
6.529	0.03724
6.621	0
6.712	0
6.804	0
6.896	0.04214
6.988	0
7.08	0
7.172	0.05488
7.264	0.12446
7.356	0.22834
7.448	0.44492
7.54	1.5435
7.631	7.1785
7.724	18.2172
7.816	33.3004
7.908	51.2491
8	67.5083
8.091	79.5417
8.183	86.6134
8.276	89.2947
8.368	88.983
8.46	87.8864
8.551	87.2102
8.643	86.7751
8.735	86.4458
8.827	86.1665
8.92	85.9088
9.012	85.7451
9.103	85.6138
9.195	85.4942
9.287	85.4217
9.379	85.4011
9.472	85.4354
9.563	85.3805
9.655	85.1404
9.747	84.9131
9.839	84.8592
9.931	84.8945
10.022	84.8445
10.115	84.6436
10.207	84.5328
10.299	84.5691
10.391	84.5495
10.482	84.5221
10.574	84.5142
10.667	84.4613
10.759	84.4241
10.851	84.3868
10.942	84.2947
11.034	84.2535
11.126	84.2761
11.218	84.183
11.311	84.1144
11.402	84.0713
11.494	83.8919
11.586	83.5724
11.678	82.8913
11.77	81.9133
11.862	80.6942
11.954	78.8047
12.046	76.2744
12.138	72.0016
12.23	66.3646
12.321	58.5589
12.413	47.5035
12.506	32.2665
12.598	19.2129
12.69	8.17418
12.781	3.46822
12.873	1.52488
12.965	1.03684
13.058	1.0486
13.15	0.86828
13.241	0.66542
13.333	0.48118
13.425	0.69188
13.517	0.71148
13.61	0.5782
13.701	0.5439
13.793	0.63014
13.885	0.59682
13.977	0.68404
14.069	1.372
14.16	3.98468
14.253	10.88
14.345	21.2876
14.437	36.1434
14.529	51.942
14.62	65.3778
14.712	74.9729
14.805	81.881
14.897	85.6618
14.989	86.8329
15.08	86.4184
15.172	85.8127
15.264	85.1992
15.356	84.4642
15.449	83.7929
15.54	83.5117
15.632	83.5979
15.724	83.7488
15.816	83.8096
15.908	83.7067
16	83.5362
16.092	83.4607
16.184	83.3755
16.276	83.3333
16.368	83.3216
16.459	83.3255
16.551	83.3706
16.644	83.4637
16.736	83.5029
16.828	83.4931
16.92	83.5842
17.011	83.6861
17.103	83.6753
17.196	83.6116
17.288	83.5303
17.38	83.5715
17.471	83.5842
17.563	83.5244
17.655	83.446
17.748	83.3862
17.84	83.3
17.931	83.2451
18.023	83.1951
18.115	83.1285
18.207	83.1148
18.299	83.0344
18.391	82.9296
18.483	82.861
18.575	82.5405
18.667	81.5928
18.759	79.8847
18.85	77.4425
18.943	74.5457
19.035	69.729
19.127	64.2184
19.219	56.8077
19.31	47.3516
19.402	34.8478
19.494	21.0827
19.587	9.33744
19.679	2.76262
19.77	1.27204
19.862	0.67424
19.954	0.53312
20.046	0.38906
20.139	0.2842
20.23	0.3479
20.322	0.4606
20.414	0.42924
20.506	0.42336
20.598	0.45864
20.69	0.49196
20.782	1.21422
20.874	4.29044
20.966	11.4366
21.058	21.2121
21.15	33.5189
21.241	47.3585
21.334	60.9237
21.426	72.9826
21.518	81.9907
21.609	86.7398
21.701	87.5346
21.793	86.8868
21.885	86.1332
21.978	85.456
22.069	84.916
22.161	84.6034
22.253	84.4574
22.345	84.2937
22.437	84.0869
22.529	83.887
22.621	83.6842
22.713	83.5969
22.805	83.5283
22.897	83.4764
22.989	83.4637
23.08	83.5068
23.173	83.4372
23.265	83.3039
23.357	83.2539
23.449	83.1648
23.54	83.0472
23.632	83.0089
23.725	82.9766
23.817	82.9541
23.909	82.9609
24	82.9511
24.092	82.8913
24.184	82.8551
24.277	82.811
24.369	82.7149
24.46	82.6052
24.552	82.517
24.644	82.4494
24.736	82.4151
24.828	82.3553
24.92	82.2661
25.012	82.224
25.104	82.0397
25.196	81.7065
25.288	81.0685
25.379	79.3486
25.472	76.6919
25.564	73.3079
25.656	69.0959
25.748	64.2341
25.839	58.7569
25.931	52.3261
26.023	43.1641
26.116	30.6632
26.208	17.199
26.299	8.19574
26.391	3.55152
26.483	1.21618
26.575	0.89082
26.668	0.69286
26.759	0.39396
26.851	0.24206
26.943	0.29988
27.035	0.34888
27.127	0.28126
27.218	0.2303
27.311	0.2499
27.403	0.33222
27.495	0.4606
27.587	1.01332
27.678	3.80926
27.77	10.0999
27.863	21.1464
27.955	34.7773
28.047	48.9726
28.138	63.8107
28.23	75.5972
28.322	83.0325
28.415	86.5252
28.507	87.0701
28.598	86.5477
28.69	86.0009
28.782	85.5148
28.874	85.064
28.966	84.7631
29.058	84.526
29.15	84.2388
29.242	84.0801
29.334	83.9625
29.426	83.8341
29.517	83.7302
29.61	83.6312
29.702	83.6606
29.794	83.6989
29.886	83.6587
29.977	83.5803
30.069	83.5391
30.161	83.5234
30.254	83.4852
30.346	83.4137
30.437	83.3343
30.529	83.2608
30.621	83.1814
30.713	83.1089
30.806	83.0981
30.898	82.9884
30.989	82.8384
31.081	82.7963
31.173	82.7973
31.265	82.7424
31.357	82.6493
31.449	82.5248
31.541	82.4219
31.633	82.3533
31.725	82.222
31.817	82.1622
31.908	82.1985
32.001	82.2122
32.093	82.1906
32.185	82.0926
32.277	81.929
32.368	81.7075
32.46	81.095
32.552	79.6397
32.645	77.4445
32.737	73.7656
32.828	69.1018
32.92	63.8284
33.012	57.0242
33.104	48.9784
33.197	39.3196
33.288	27.7301
33.38	16.2464
33.472	6.61304
33.564	2.10994
33.656	0.71442
33.748	0.6909
33.84	0.4459
33.932	0.21462
34.024	0.17542
34.116	0.23618
34.207	0.2646
34.299	0.2499
34.392	0.2401
34.484	0.25578
34.576	0.4704
34.667	0.86828
34.759	2.93608
34.851	8.39566
34.944	17.0275
35.036	30.1634
35.127	44.9016
35.219	59.143
35.311	70.9804
35.403	79.4947
35.495	84.5417
35.587	86.5281
35.679	86.6389
35.771	86.239
35.863	85.7853
35.955	85.3217
36.046	85.0121
36.139	84.7132
36.231	84.3927
36.323	84.2016
36.415	84.0526
36.507	83.985
36.598	83.8292
36.69	83.6499
36.783	83.6538
36.875	83.6087
36.967	83.5332
37.058	83.4666
37.15	83.3941
37.242	83.3225
37.335	83.2138
37.427	83.102
37.518	83.057
37.61	82.9707
37.702	82.9384
37.794	82.9021
37.887	82.8237
37.978	82.7747
38.07	82.7345
38.162	82.7296
38.254	82.7022
38.346	82.6297
38.437	82.5189
38.53	82.4415
38.622	82.4121
38.714	82.3612
38.806	82.3416
38.897	82.27
38.989	82.175
39.082	82.1122
39.174	81.9907
39.266	81.7398
39.357	81.194
39.449	80.1062
39.541	78.8802
39.633	77.321
39.726	74.6731
39.817	71.7801
39.909	68.2688
40.001	62.7788
40.093	55.6875
40.185	47.7319
40.277	35.6867
40.369	21.4404
40.461	10.4615
40.553	3.50644
40.645	1.55036
40.736	0.75166
40.828	0.48706
40.921	0.36064
41.013	0.2499
41.105	0.21854
41.196	0.2597
41.288	0.42728
41.38	0.91336
41.473	3.5623
41.565	10.7153
41.656	22.0471
41.748	36.9607
41.84	51.2177
41.932	64.0871
42.024	74.1448
42.116	80.5707
42.208	83.6312
42.3	84.4388
42.392	84.2192
42.484	83.7528
42.575	83.3764
42.668	83.1755
42.76	82.9737
42.852	82.7904
42.944	82.6846
43.035	82.6101
43.127	82.5229
43.22	82.4543
43.312	82.3543
43.404	82.2475
43.496	82.0926
43.587	81.9104
43.679	81.7918
43.771	81.6369
43.864	81.4694
43.956	81.4155
44.047	81.3645
44.139	81.2802
44.231	81.2018
44.323	81.142
44.416	81.047
44.507	80.9656
44.599	80.9343
44.691	80.9059
44.783	80.8608
44.875	80.85
44.966	80.8618
45.059	80.8961
45.151	80.8245
45.243	80.7863
45.335	80.7216
45.426	80.5658
45.518	80.3012
45.611	79.8141
45.703	78.8253
45.795	77.0701
45.886	74.8279
45.978	71.6351
46.07	67.3936
46.162	62.8846
46.255	57.2761
46.346	49.3361
46.438	37.1704
46.53	21.9324
46.622	9.97346
46.714	2.80084
46.806	0.85946
46.898	0.5047
46.99	0.1764
47.082	0
47.174	0
47.265	0
47.357	0
47.45	0.03234
47.542	0.17738
47.634	0.64778
47.726	3.45842
47.817	10.6261
47.909	20.9994
48.002	34.7243
48.094	48.3581
48.186	60.6865
48.277	70.5649
48.369	77.42
48.461	80.9794
48.554	82.0427
48.646	82.1485
48.737	81.9956
48.829	81.828
48.921	81.7712
49.013	81.6987
49.105	81.5566
49.197	81.4321
49.289	81.3557
49.381	81.2028
49.473	81.0744
49.565	80.9705
49.656	80.8598
49.749	80.7314
49.841	80.6187
49.933	80.5423
50.025	80.4825
50.116	80.4894
50.208	80.4805
50.3	80.4776
50.393	80.4776
50.485	80.4394
50.576	80.3943
50.668	80.31
50.76	80.2277
50.852	80.1532
50.945	80.0611
51.036	80.0258
51.128	80.0101
51.22	79.9553
51.312	79.8808
51.404	79.82
51.495	79.7612
51.588	79.6965
51.68	79.6358
51.772	79.5701
51.864	79.4702
51.955	79.3888
52.047	79.329
52.14	79.2604
52.232	79.1752
52.324	79.0664
52.415	78.8332
52.507	78.3951
52.599	77.7816
52.692	76.6252
52.784	74.7025
52.875	72.5288
52.967	69.8642
53.059	66.3146
53.151	62.132
53.243	56.6567
53.335	48.7217
53.427	37.2449
53.519	23.4759
53.611	10.8682
53.703	3.66226
53.794	1.13876
53.887	0.5537
53.979	0.31948
54.071	0.0441
54.163	0
54.255	0
54.346	0
54.438	0
54.531	0.0294
54.623	0.196
54.715	0.39494
54.806	1.4308
54.898	5.88392
54.99	14.8499
55.083	27.8928
55.175	42.5653
55.266	55.5925
55.358	66.1716
55.45	74.2644
55.542	80.3433
55.634	83.7381
55.726	84.5828
55.818	84.2761
55.91	83.8351
56.002	83.4274
56.094	83.1491
56.185	82.9286
56.278	82.6826
56.37	82.4758
56.462	82.321
56.554	82.1946
56.645	82.1044
56.737	82.0211
56.829	81.9535
56.922	81.9545
57.014	81.9064
57.105	81.7859
57.197	81.7291
57.289	81.6908
57.381	81.6144
57.474	81.4801
57.565	81.3674
57.657	81.2979
57.749	81.2165
57.841	81.1822
57.933	81.1636
58.024	81.0989
58.117	81.0244
58.209	80.9607
58.301	80.8921
58.393	80.8314
58.484	80.7892
58.576	80.7775
58.669	80.7902
58.761	80.7432
58.853	80.6638
58.944	80.5776
59.036	80.5139
59.128	80.4266
59.221	80.3061
59.313	80.0454
59.404	79.529
59.496	78.6715
59.588	77.3553
59.68	75.2179
59.772	72.421
59.864	69.0871
59.956	64.4605
60.048	59.3439
60.14	52.2722
60.232	42.1704
60.323	27.7791
60.416	12.6312
60.508	5.61932
60.6	1.58172
60.692	0.49882
60.783	0.5145
60.875	0.29596
60.967	0.09114
61.06	0.04802
61.152	0.03626
61.243	0.09702
61.335	0.10878
61.427	0.1176
61.519	0.13034
61.612	0.30968
61.704	1.00842
61.795	3.86022
61.887	10.928
61.979	21.5796
62.071	35.772
62.162	49.7977
62.255	62.0095
62.347	71.4714
62.439	77.9766
62.531	81.9084
62.623	83.6077
62.714	83.9654
62.807	83.5901
62.899	83.0403
62.991	82.613
63.083	82.2387
63.174	81.9447
63.266	81.7153
63.359	81.4978
63.451	81.2841
63.543	81.1058
63.634	80.9862
63.726	80.9088
63.818	80.8804
63.91	80.8422
64.003	80.7971
64.094	80.7549
64.186	80.6991
64.278	80.6011
64.37	80.5266
64.462	80.4796
64.554	80.3992
64.646	80.3414
64.738	80.3296
64.83	80.31
64.922	80.2757
65.013	80.2512
65.105	80.2052
65.198	80.1307
65.29	80.0288
65.382	79.9386
65.473	79.9014
65.565	79.8573
65.657	79.7916
65.75	79.7034
65.842	79.6417
65.933	79.6142
66.025	79.5564
66.117	79.4604
66.209	79.3094
66.301	79.0311
66.393	78.4578
66.485	77.1044
66.577	75.166
66.669	72.865
66.761	69.2889
66.852	64.2361
66.945	57.2398
67.037	46.7293
67.129	33.0995
67.221	15.9985
67.312	5.66538
67.404	2.13934
67.496	0.4263
67.589	0.49
67.681	0.32928
67.772	0
67.864	0
67.956	0
68.048	0
68.141	0
68.232	0
68.324	0
68.416	0
68.508	0.03822
68.6	0.22736
68.692	0.57036
68.784	1.91688
68.876	6.06228
68.968	13.9091
69.06	26.4316
69.151	40.3809
69.243	52.9504
69.336	63.5314
69.428	72.1211
69.52	78.5578
69.611	82.3014
69.703	83.4695
69.795	83.4401
69.888	83.102
69.98	82.7492
70.071	82.5336
70.163	82.4131
70.255	82.2112
70.347	82.0417
70.439	81.8427
70.531	81.6908
70.623	81.5801
70.715	81.4831
70.807	81.4282
70.899	81.3498
70.99	81.292
71.083	81.2645
71.175	81.2106
71.267	81.1881
71.359	81.145
71.45	81.0705
71.542	81.0058
71.634	80.9068
71.727	80.8402
71.819	80.7951
71.91	80.7236
72.002	80.6285
72.094	80.5511
72.186	80.4629
72.279	80.3982
72.37	80.3257
72.462	80.2424
72.554	80.2061
72.646	80.1611
72.738	80.0983
72.829	80.0621
72.922	80.0611
73.014	80.0121
73.106	79.9219
73.198	79.8328
73.289	79.6838
73.381	79.4408
73.474	79.087
73.566	78.5764
73.658	77.912
73.749	76.8849
73.841	75.315
73.933	73.2717
74.026	70.464
74.118	66.6684
74.209	61.4695
74.301	53.9715
74.393	42.1821
74.485	26.2287
74.577	11.0975
74.669	3.91118
74.761	1.4063
74.853	0.61054
74.945	0.48314
75.037	0.29498
75.128	0.01568
75.221	0
75.313	0
75.405	0
75.497	0
75.588	0
75.68	0
75.772	0
75.865	0
75.957	0
76.048	0.06174
76.14	0.15288
76.232	0.42042
76.324	1.50626
76.417	5.96134
76.508	15.094
76.6	27.5302
76.692	42.4869
76.784	55.7992
76.876	66.1147
76.967	73.6196
77.06	78.8263
77.152	81.6203
77.244	82.8443
77.336	83.1285
77.427	82.861
77.519	82.5287
77.612	82.2396
77.704	82.077
77.796	81.8476
77.887	81.634
77.979	81.4713
78.071	81.3351
78.164	81.2714
78.256	81.1734
78.347	81.0695
78.439	80.9568
78.531	80.7922
78.623	80.6844
78.715	80.5599
78.807	80.4492
78.899	80.3865
78.991	80.2992
79.083	80.2689
79.175	80.2845
79.266	80.2277
79.359	80.1758
79.451	80.1228
79.543	80.0709
79.635	80.0229
79.726	79.9837
79.818	79.9464
79.91	79.9053
80.003	79.8671
80.095	79.8622
80.186	79.8504
80.278	79.8122
80.37	79.7622
80.462	79.7377
80.555	79.7152
80.646	79.5339
80.738	79.0644
80.83	78.3304
80.922	77.5219
81.014	76.5008
81.105	75.361
81.198	73.9792
81.29	71.9124
81.382	69.1674
81.474	65.1876
81.565	59.9143
81.657	53.8755
81.75	45.2241
81.842	31.3296
81.934	13.673
82.025	3.76124
82.117	1.2201
82.209	0.41258
82.301	0.2891
82.394	0.01666
82.485	0
82.577	0
82.669	0
82.761	0
82.853	0
82.945	0
83.037	0
83.129	0
83.221	0
83.313	0
83.404	0
83.496	0
83.589	0
83.681	0
83.773	0
83.865	0.16464
83.956	0.7399
84.048	4.23066
84.141	12.9311
84.233	24.6078
84.325	39.545
84.416	52.9768
84.508	63.849
84.6	71.9643
84.693	77.5121
84.785	80.6422
84.876	81.8045
84.968	82.1975
85.06	82.2818
85.152	82.1181
85.244	81.7761
85.336	81.5987
85.428	81.4596
85.52	81.3214
85.612	81.1763
85.704	81.0097
85.795	80.8853
85.888	80.7775
85.98	80.6805
86.072	80.606
86.163	80.5903
86.255	80.5736
86.347	80.5393
86.439	80.505
86.532	80.4756
86.623	80.4247
86.715	80.3443
86.807	80.2669
86.899	80.2404
86.991	80.2169
87.083	80.1865
87.175	80.1415
87.267	80.0523
87.359	79.9121
87.451	79.8426
87.543	79.8171
87.634	79.7563
87.727	79.7093
87.819	79.6809
87.911	79.5956
88.003	79.4947
88.094	79.4476
88.186	79.3996
88.279	79.3192
88.371	79.2222
88.463	78.9635
88.554	78.4608
88.646	77.712
88.738	76.4028
88.831	74.4369
88.923	72.5122
89.014	70.2356
89.106	66.6204
89.198	61.7135
89.29	56.1089
89.382	47.6055
89.474	31.7236
89.566	14.3462
89.658	5.26456
89.75	1.27498
89.842	0.57232
89.933	0.38808
90.026	0
90.118	0
90.21	0
90.302	0
90.393	0
90.485	0
90.577	0
90.67	0
90.762	0
90.853	0
90.945	0
91.037	0
91.129	0
91.222	0.01372
91.313	0.15484
91.405	0.36946
91.497	1.2789
91.589	4.7971
91.681	12.938
91.772	26.8814
91.865	43.8285
91.957	58.3335
92.049	68.8773
92.141	75.5345
92.232	79.0791
92.324	80.3414
92.417	80.5099
92.509	80.4188
92.601	80.2022
92.692	80.0072
92.784	79.8337
92.876	79.77
92.968	79.6809
93.061	79.5299
93.152	79.5025
93.244	79.4682
93.336	79.3771
93.428	79.3212
93.52	79.2389
93.612	79.1781
93.704	79.1036
93.796	78.9674
93.888	78.8802
93.98	78.8714
94.071	78.8616
94.164	78.8204
94.256	78.7479
94.348	78.6705
94.44	78.5911
94.531	78.4882
94.623	78.3804
94.715	78.2873
94.808	78.2628
94.9	78.2599
94.991	78.2207
95.083	77.9943
95.175	76.9672
95.267	73.5078
95.36	66.4028
95.451	56.7469
95.543	45.7376
95.635	30.0968
95.727	13.9973
95.819	5.36256
95.91	1.36612
96.003	0.69776
96.095	0.41258
96.187	0
96.279	0
96.37	0
96.462	0
96.555	0
96.647	0
96.739	0
96.83	0
96.922	0
97.014	0
97.106	0
97.199	0
97.29	0
97.382	0
97.474	0
97.566	0
97.658	0
97.75	0.06762
97.842	0.49196
97.934	3.22616
98.026	12.6753
98.118	27.442
98.209	45.4259
98.301	60.905
98.394	71.391
98.486	78.057
98.578	81.5674
98.669	82.7081
98.761	82.6904
98.853	82.3719
98.946	81.9505
99.038	81.5487
99.129	81.3096
99.221	81.1371
99.313	80.9833
99.405	80.8774
99.498	80.7696
99.589	80.7177
99.681	80.7569
99.773	80.7216
99.865	80.6873
99.957	80.6765
100.048	80.6197
100.141	80.5903
100.233	80.5374
100.325	80.4443
100.417	80.3453
100.508	80.2532
100.6	80.1944
100.693	80.1346
100.785	80.1287
100.877	80.1424
100.968	80.1611
101.06	80.1513
101.152	80.0895
101.244	80.0229
101.337	79.9641
101.428	79.9337
101.52	79.9229
101.612	79.7877
101.704	79.3712
101.796	78.2873
101.888	76.047
101.98	72.7552
102.072	69.3703
102.164	65.9001
102.255	61.0511
102.347	54.6144
102.439	44.1294
102.532	26.4453
102.624	10.2488
102.715	2.83612
102.807	0.89278
102.899	0.71148
102.991	0.36456
103.084	0.03136
103.175	0
103.267	0
103.359	0
103.451	0
103.543	0
103.634	0
103.727	0
103.819	0
103.911	0
104.003	0
104.094	0
104.186	0
104.279	0
104.371	0
104.463	0
104.554	0
104.646	0
104.738	0.08918
104.831	0.22246
104.923	0.7203
105.014	3.3761
105.106	12.8135
105.198	28.3984
105.29	45.3985
105.382	59.7114
105.474	69.7064
105.566	76.6331
105.658	80.7471
105.75	82.6003
105.842	83.1089
105.933	83.0383
106.026	82.6689
106.118	82.3553
106.21	82.0583
106.302	81.8261
106.393	81.6516
106.485	81.4801
106.577	81.2979
106.67	81.1332
106.762	80.9676
106.853	80.75
106.945	80.6256
107.037	80.5286
107.129	80.4002
107.222	80.3257
107.314	80.2963
107.405	80.2434
107.497	80.2385
107.589	80.1973
107.681	80.1856
107.773	80.1954
107.865	80.1424
107.957	80.0768
108.049	80.0376
108.141	79.9768
108.233	79.918
108.324	79.8024
108.417	79.7014
108.509	79.6779
108.601	79.6201
108.693	79.5633
108.784	79.4574
108.876	79.3212
108.968	79.1673
109.061	78.9429
109.153	78.6234
109.244	78.0697
109.336	76.8879
109.428	74.8465
109.52	71.9692
109.613	67.8777
109.704	62.7984
109.796	56.0991
109.888	45.2103
109.98	30.5437
110.072	14.8774
110.164	3.58288
110.256	0.85554
110.348	0.5243
110.44	0.09114
110.532	0
110.623	0
110.715	0
110.808	0
110.9	0
110.992	0
111.083	0
111.175	0
111.267	0
111.36	0
111.452	0
111.543	0
111.635	0
111.727	0
111.819	0
111.911	0
112.003	0
112.095	0.04508
112.187	0.33614
112.279	1.74048
112.371	8.47308
112.462	20.6006
112.555	37.2126
112.647	54.4684
112.739	66.3117
112.831	73.6617
112.922	78.6499
113.014	81.536
113.106	82.5611
113.199	82.7169
113.291	82.6522
113.382	82.4601
113.474	82.1534
113.566	81.8447
113.658	81.5811
113.751	81.3723
113.842	81.1646
113.934	80.9774
114.026	80.8353
114.118	80.7128
114.21	80.6001
114.301	80.4825
114.394	80.3698
114.486	80.2649
114.578	80.164
114.67	80.0807
114.761	80.0415
114.853	79.9876
114.946	79.917
115.038	79.8867
115.13	79.8416
115.221	79.7514
115.313	79.6818
115.405	79.6142
115.498	79.5211
115.59	79.4584
115.681	79.4025
115.773	79.3722
115.865	79.3202
115.957	79.2389
116.049	79.1428
116.141	79.0439
116.233	78.9419
116.325	78.8067
116.417	78.5891
116.509	78.2138
116.6	77.7356
116.693	77.3259
116.785	76.8849
116.877	76.1166
116.969	74.7691
117.06	72.2064
117.152	68.3236
117.244	63.1806
117.337	52.8377
117.429	35.2447
117.52	18.1447
117.612	7.31276
117.704	1.8179
117.796	0.92218
117.889	0.4508
117.98	0.17934
118.072	0.04606
118.164	0
118.256	0
118.348	0
118.439	0
118.532	0
118.624	0
118.716	0
118.808	0
118.899	0
118.991	0
119.084	0
119.176	0
119.268	0
119.359	0
119.451	0
119.543	0
119.636	0
119.728	0
119.819	0
119.911	0.02058
120.003	0.26754
120.095	1.35436
120.187	7.4039
120.279	20.533
120.371	36.7128
120.463	51.1932
120.555	61.5685
120.647	68.8617
120.738	74.5947
120.831	78.888
120.923	81.2557
121.015	82.1044
121.107	82.0015
121.198	81.5997
121.29	81.2498
121.382	80.9803
121.475	80.7834
121.567	80.6364
121.658	80.4423
121.75	80.2414
121.842	80.0337
121.934	79.872
122.027	79.7495
122.118	79.626
122.21	79.5143
122.302	79.4653
122.394	79.4506
122.486	79.4457
122.577	79.4192
122.67	79.3555
122.762	79.2722
122.854	79.1556
122.946	79.1095
123.037	79.1007
123.129	79.0145
123.222	78.8822
123.314	78.8194
123.406	78.7587
123.497	78.7038
123.589	78.6587
123.681	78.594
123.773	78.5284
123.866	78.4725
123.957	78.4333
124.049	78.3637
124.141	78.255
124.233	78.1305
124.325	78.0119
124.417	77.8159
124.509	77.5121
124.601	77.126
124.693	76.5772
124.785	75.6903
124.876	74.2262
124.968	72.0329
125.061	69.2978
125.153	65.2455
125.245	59.8898
125.336	54.1332
125.428	44.2999
125.52	27.5909
125.613	11.3082
125.705	3.90334
125.796	1.05644
125.888	0.55664
125.98	0.43806
126.072	0
126.165	0
126.256	0
126.348	0
126.44	0
126.532	0
126.624	0
126.715	0
126.808	0
126.9	0
126.992	0
127.084	0
127.175	0
127.267	0
127.36	0
127.452	0
127.544	0
127.635	0
127.727	0
127.819	0
127.911	0
128.004	0
128.095	0
128.187	0.16072
128.279	1.02998
128.371	6.0123
128.463	16.9305
128.555	32.3527
128.647	48.6345
128.739	61.1324
128.831	70.1494
128.923	76.4949
129.014	80.4933
129.106	82.0495
129.199	82.0632
129.291	81.6859
129.383	81.3792
129.474	81.0676
129.566	80.8
129.658	80.604
129.751	80.4727
129.843	80.4041
129.934	80.2904
130.026	80.1836
130.118	80.1013
130.21	80.0327
130.303	80.0003
130.394	79.9229
130.486	79.7975
130.578	79.7161
130.67	79.7103
130.762	79.6956
130.853	79.6593
130.946	79.6289
131.038	79.6074
131.13	79.5799
131.222	79.5319
131.313	79.4917
131.405	79.478
131.498	79.3967
131.59	79.2751
131.682	79.183
131.773	79.087
131.865	78.9958
131.957	78.9125
132.049	78.8047
132.142	78.6636
132.233	78.5107
132.325	78.3902
132.417	78.1854
132.509	77.7659
132.601	77.1446
132.693	76.0833
132.785	73.4049
132.877	68.8734
132.969	63.016
133.061	54.4223
133.152	41.5745
133.244	28.0202
133.337	13.2173
133.429	3.73086
133.521	1.37886
133.612	0.28224
133.704	0.21756
133.796	0
133.889	0
133.981	0
134.072	0
134.164	0
134.256	0
134.348	0
134.44	0
134.532	0
134.624	0
134.716	0
134.808	0
134.9	0
134.991	0
135.084	0
135.176	0
135.268	0
135.36	0
135.451	0
135.543	0
135.636	0.19894
135.728	0.99078
135.82	5.5419
135.911	18.2535
136.003	37.7712
136.095	55.1034
136.187	66.2029
136.28	73.3893
136.371	78.0531
136.463	80.7941
136.555	82.1142
136.647	82.4082
136.739	82.3935
136.831	82.0868
136.923	81.6409
137.015	81.2616
137.107	81.0401
137.199	80.8696
137.29	80.6589
137.382	80.4766
137.475	80.3561
137.567	80.2875
137.659	80.213
137.75	80.0689
137.842	79.9023
137.934	79.8092
138.027	79.7024
138.119	79.5564
138.21	79.4398
138.302	79.3506
138.394	79.2379
138.486	79.1732
138.578	79.1095
138.67	79.0546
138.762	79.0213
138.854	78.9831
138.946	78.9684
139.038	78.9635
139.129	78.9321
139.222	78.8851
139.314	78.8557
139.406	78.8243
139.498	78.7842
139.589	78.7195
139.681	78.6283
139.773	78.5245
139.866	78.3912
139.958	78.2746
140.049	78.1687
140.141	78.0198
140.233	77.7454
140.325	77.2583
140.418	76.3832
140.509	74.3732
140.601	71.2813
140.693	67.4926
140.785	62.4299
140.877	55.2348
140.968	45.6729
141.061	31.1434
141.153	15.1214
141.245	5.2087
141.337	1.28282
141.429	0.60956
141.52	0.38612
141.613	0.03528
141.705	0
141.797	0
141.889	0
141.98	0
142.072	0
142.165	0
142.257	0
142.349	0
142.44	0
142.532	0
142.624	0
142.716	0
142.809	0
142.9	0
142.992	0
143.084	0
143.176	0
143.268	0
143.36	0
143.452	0
143.544	0
143.636	0
143.728	0
143.819	0
143.911	0.17934
144.004	0.68796
144.096	4.4443
144.188	14.5628
144.279	28.3347
144.371	43.4356
144.463	56.6989
144.556	66.9595
144.648	74.0321
144.739	78.1276
144.831	80.117
144.923	80.7824
145.015	80.8392
145.108	81.0097
145.199	81.0803
145.291	80.898
145.383	80.5158
145.475	80.312
145.567	80.214
145.658	79.97
145.751	79.823
145.843	79.7348
145.935	79.6877
146.027	79.6867
146.118	79.7397
146.21	79.8553
146.303	79.8073
146.395	79.7269
146.487	79.6426
146.578	79.5652
146.67	79.4907
146.762	79.4045
146.854	79.2957
146.947	79.1997
147.038	79.0899
147.13	78.9498
147.222	78.8126
147.314	78.694
147.406	78.5803
147.498	78.4755
147.59	78.3726
147.682	78.2501
147.774	78.107
147.866	78.0354
147.957	77.9218
148.049	77.7052
148.142	77.5004
148.234	77.2338
148.326	76.7732
148.417	76.0813
148.509	75.1268
148.601	73.6411
148.694	71.146
148.786	67.5563
148.877	62.1398
148.969	52.1527
149.061	32.9995
149.153	12.5391
149.245	4.37668
149.337	1.02508
149.429	0.46158
149.521	0.41846
149.613	0.04508
149.705	0
149.796	0
149.889	0
149.981	0
150.073	0
150.165	0
150.256	0
150.348	0
150.44	0
150.533	0
150.625	0
150.716	0
150.808	0
150.9	0
150.992	0
151.085	0
151.176	0
151.268	0
151.36	0
151.452	0
151.544	0
151.636	0
151.728	0
151.82	0.13818
151.912	0.98098
152.004	6.02896
152.095	18.033
152.187	33.9443
152.28	50.6787
152.372	63.4099
152.464	71.6429
152.555	76.6321
152.647	79.5838
152.739	80.8686
152.832	80.9441
152.924	80.5178
153.015	80.1993
153.107	80.0425
153.199	79.8445
153.291	79.6701
153.383	79.627
153.475	79.5172
153.567	79.3045
153.659	79.1125
153.751	78.9978
153.843	78.9057
153.934	78.8361
154.027	78.7744
154.119	78.6568
154.211	78.5666
154.303	78.4186
154.394	78.2559
154.486	78.1668
154.578	78.0511
154.671	77.8875
154.763	77.7865
154.854	77.6993
154.946	77.6464
155.038	77.6591
155.13	77.7287
155.223	77.7287
155.314	77.7444
155.406	77.6787
155.498	77.5611
155.59	77.4837
155.682	77.3975
155.773	77.3298
155.866	77.271
155.958	77.2289
156.05	77.1368
156.142	76.981
156.233	76.7663
156.325	76.586
156.418	76.3606
156.51	76.0999
156.602	75.7109
156.694	75.0317
156.785	73.8881
156.877	72.4279
156.97	70.6217
157.062	67.6514
157.154	63.7794
157.245	58.4501
157.337	49.8898
157.429	39.8566
157.521	27.4949
157.614	10.73
157.705	2.61464
157.797	1.0094
157.889	0.28714
157.981	0.1862
158.073	0.01764
158.165	0
158.257	0
158.349	0
158.441	0
158.533	0
158.624	0
158.716	0
158.809	0
158.901	0
158.993	0
159.084	0
159.176	0
159.268	0
159.361	0
159.453	0
159.544	0
159.636	0
159.728	0
159.82	0
159.912	0
160.004	0
160.096	0
160.188	0
160.28	0
160.372	0
160.463	0
160.556	0.14308
160.648	0.57232
160.74	3.6456
160.832	12.6547
160.923	26.8157
161.015	43.6472
161.108	57.6877
161.2	67.7278
161.292	74.7828
161.383	78.892
161.475	80.2581
161.567	80.3629
161.659	80.0454
161.752	79.6358
161.843	79.3016
161.935	79.0674
162.027	78.8929
162.119	78.743
162.211	78.6989
162.303	78.6577
162.395	78.5666
162.487	78.4392
162.579	78.3285
162.671	78.1962
162.762	78.0854
162.854	78.0511
162.947	77.9953
163.039	77.9149
163.131	77.8982
163.222	77.8463
163.314	77.81
163.406	77.7924
163.499	77.764
163.591	77.6817
163.682	77.6258
163.774	77.569
163.866	77.5004
163.958	77.4396
164.05	77.3847
164.143	77.2965
164.234	77.2005
164.326	77.1407
164.418	77.0309
164.51	76.8908
164.602	76.6968
164.694	76.3743
164.786	76.0558
164.878	75.6942
164.97	75.1689
165.062	74.4036
165.153	72.9796
165.245	70.8442
165.338	68.5059
165.43	66.2019
165.522	63.799
165.613	60.8864
165.705	56.5793
165.797	48.7364
165.89	36.6432
165.982	20.0116
166.073	5.91136
166.165	1.56016
166.257	0.57918
166.349	0.19502
166.442	0
166.533	0
166.625	0
166.717	0
166.809	0
166.901	0
166.992	0
167.085	0
167.177	0
167.269	0
167.361	0
167.452	0
167.544	0
167.637	0
167.729	0
167.821	0
167.912	0
168.004	0
168.096	0
168.188	0
168.281	0
168.372	0
168.464	0
168.556	0
168.648	0
168.74	0
168.832	0.33614
168.924	2.48332
169.016	11.9295
169.108	26.0141
169.2	42.0342
169.291	56.1707
169.383	65.7913
169.476	72.0457
169.568	76.0441
169.66	78.4216
169.751	79.5094
169.843	79.6926
169.935	79.1879
170.028	78.6901
170.12	78.4598
170.211	78.2795
170.303	78.0541
170.395	77.8571
170.487	77.6591
170.58	77.4592
170.671	77.2456
170.763	77.0603
170.855	76.9006
170.947	76.7477
171.039	76.6223
171.13	76.5615
171.223	76.4302
171.315	76.2979
171.407	76.1911
171.499	76.0803
171.59	75.9843
171.682	75.9128
171.775	75.8589
171.867	75.8295
171.959	75.7422
172.05	75.605
172.142	75.5031
172.234	75.3875
172.326	75.2728
172.419	75.1258
172.51	75.0033
172.602	74.8916
172.694	74.7475
172.786	74.5966
172.878	74.3977
172.97	74.2497
173.062	73.894
173.154	73.3922
173.246	73.0688
173.338	72.6405
173.429	71.4489
173.521	69.3448
173.614	67.5749
173.706	65.6061
173.798	61.444
173.889	54.7644
173.981	45.2887
174.073	27.8095
174.166	8.21044
174.258	1.56016
174.35	0.54096
174.441	0.20384
174.533	0
174.625	0
174.717	0
174.81	0
174.901	0
174.993	0
175.085	0
175.177	0
175.269	0
175.361	0
175.453	0
175.545	0
175.637	0
175.729	0
175.82	0
175.912	0
176.005	0
176.097	0
176.189	0
176.28	0
176.372	0
176.464	0
176.557	0
176.649	0
176.74	0.29988
176.832	2.77536
176.924	14.9362
177.016	34.1765
177.108	51.8802
177.2	64.4575
177.292	72.522
177.384	77.0094
177.476	78.5813
177.567	78.7116
177.659	78.3353
177.752	77.8924
177.844	77.6238
177.936	77.3828
178.027	77.1623
178.119	77.0682
178.211	76.8418
178.304	76.5037
178.396	76.4665
178.487	76.487
178.579	76.4518
178.671	76.3881
178.763	76.2577
178.855	76.1323
178.947	76.0304
179.039	75.8961
179.131	75.7991
179.223	75.7462
179.315	75.6805
179.406	75.5982
179.499	75.4865
179.591	75.3747
179.683	75.2846
179.775	75.213
179.866	75.1346
179.958	75.0494
180.05	74.9808
180.143	74.9592
180.235	74.921
180.326	74.8083
180.418	74.6515
180.51	74.5408
180.602	74.4428
180.695	74.2732
180.786	74.1595
180.878	74.0008
180.97	73.6921
181.062	73.1658
181.154	72.3387
181.245	71.0627
181.338	69.1625
181.43	67.2741
181.522	65.4846
181.614	62.624
181.705	58.113
181.797	50.0437
181.89	34.6969
181.982	14.2335
182.074	3.13208
182.166	0.7154
182.257	0.26362
182.349	0
182.442	0
182.534	0
182.626	0
182.717	0
182.809	0
182.901	0
182.993	0
183.086	0
183.177	0
183.269	0
183.361	0
183.453	0
183.545	0
183.637	0
183.729	0
[truncated: 3,501 more rows]

## Sheet: S04-Right hand
Time/s	Force/N
0	0
0.092	0.01568
0.185	0.16562
0.277	0.26264
0.369	0.33222
0.46	0.35966
0.552	0.39886
0.644	0.32046
0.737	0.32536
0.829	0.38416
0.92	0.29498
1.012	0.32046
1.104	0.43806
1.196	0.53508
1.288	0.56448
1.38	0.65072
1.472	0.77224
1.564	0.82124
1.656	0.79576
1.748	0.8036
1.839	0.88886
1.932	0.98392
2.024	1.08878
2.116	1.37788
2.208	1.55526
2.299	1.65522
2.391	1.81496
2.484	1.74048
2.576	1.72578
2.668	1.77184
2.759	1.93452
2.851	2.28438
2.943	2.9057
3.035	4.35806
3.128	6.36314
3.219	8.60636
3.311	11.7149
3.403	16.1739
3.495	21.5933
3.587	28.8904
3.68	38.9756
3.771	49.8663
3.863	60.4239
3.955	70.0729
4.047	79.1046
4.139	87.8766
4.23	94.5494
4.323	97.5159
4.415	97.5776
4.507	96.4144
4.599	95.2256
4.69	94.2437
4.782	93.592
4.875	93.1696
4.967	92.6453
5.059	92.1827
5.15	91.8534
5.242	91.6506
5.334	91.5202
5.426	91.4242
5.519	91.286
5.61	91.1527
5.702	91.0645
5.794	90.9401
5.886	90.8176
5.978	90.7098
6.07	90.5598
6.162	90.3374
6.254	90.162
6.346	89.9865
6.438	89.9366
6.529	89.8797
6.621	89.7474
6.714	89.573
6.806	89.4662
6.898	89.4407
6.99	89.5083
7.081	89.717
7.173	90.0316
7.266	90.4667
7.358	90.9146
7.45	91.0587
7.541	90.8009
7.633	90.5304
7.725	90.2992
7.818	89.9807
7.91	89.1643
8.001	87.121
8.093	82.3141
8.185	74.7956
8.277	65.4993
8.369	52.4035
8.461	36.601
8.553	21.7335
8.645	8.97092
8.737	3.08406
8.829	1.85416
8.92	1.23774
9.013	1.35338
9.105	1.0878
9.197	1.14366
9.289	1.06134
9.38	1.03194
9.472	1.0094
9.564	1.01626
9.657	0.99568
9.749	1.0339
9.841	0.98588
9.932	0.99274
10.024	1.19462
10.116	2.62346
10.209	9.23846
10.301	22.8271
10.392	39.0412
10.484	55.1044
10.576	70.3669
10.668	83.301
10.76	91.679
10.852	95.6206
10.944	96.4036
11.036	95.6225
11.128	94.7346
11.22	94.0908
11.311	93.5606
11.404	93.0441
11.496	92.6414
11.588	92.4326
11.68	92.3189
11.771	92.1543
11.863	92.0249
11.956	91.8779
12.048	91.7584
12.14	91.7182
12.231	91.6075
12.323	91.4644
12.415	91.3095
12.507	91.1371
12.6	90.9685
12.691	90.8519
12.783	90.7353
12.875	90.5941
12.967	90.4854
13.059	90.3207
13.152	90.1718
13.243	90.0934
13.335	89.9983
13.427	89.9199
13.519	89.8993
13.611	89.7112
13.702	89.4877
13.795	89.3437
13.887	89.2359
13.979	89.1643
14.071	89.1486
14.162	89.0595
14.254	88.8439
14.347	88.2578
14.439	86.0567
14.531	81.9055
14.622	75.4492
14.714	65.5052
14.806	53.9637
14.898	39.7909
14.991	24.5706
15.082	11.8462
15.174	3.87394
15.266	2.68912
15.358	1.56996
15.45	1.47
15.542	1.5043
15.634	1.22402
15.726	1.11034
15.818	1.07114
15.91	1.06134
16.002	1.13386
16.093	1.1172
16.186	1.16718
16.278	1.62092
16.37	4.35022
16.462	13.4231
16.553	28.0045
16.645	45.4348
16.738	63.261
16.83	78.1001
16.922	88.2157
17.013	93.2921
17.105	94.5612
17.197	94.0212
17.29	93.1657
17.382	92.561
17.473	92.1288
17.565	91.8133
17.657	91.628
17.749	91.3674
17.841	91.1576
17.933	90.9371
18.025	90.7529
18.117	90.6696
18.209	90.602
18.301	90.5353
18.392	90.4511
18.485	90.2982
18.577	90.1139
18.669	89.9444
18.761	89.864
18.852	89.7592
18.944	89.6347
19.036	89.5808
19.129	89.4975
19.221	89.4377
19.313	89.3691
19.404	89.2261
19.496	89.1477
19.588	89.0575
19.681	88.9615
19.773	88.8899
19.864	88.7076
19.956	88.4979
20.048	88.4234
20.14	88.4881
20.232	88.4117
20.324	87.5738
20.416	85.0846
20.508	80.9029
20.6	75.5982
20.692	69.4389
20.783	62.0948
20.876	52.1154
20.968	38.9334
21.06	25.8818
21.152	14.7157
21.243	6.34256
21.335	2.63522
21.428	1.29262
21.52	1.20834
21.612	0.81046
21.703	0.7105
21.795	0.68404
21.887	0.70168
21.979	0.6958
22.072	0.686
22.164	0.72324
22.255	0.931
22.347	1.89042
22.439	5.58404
22.531	14.1179
22.624	27.5292
22.715	44.3891
22.807	61.2676
22.899	75.6403
22.991	86.486
23.083	93.6517
23.174	96.4986
23.267	96.2928
23.359	95.3295
23.451	94.5112
23.543	93.8125
23.634	93.2686
23.726	92.8266
23.819	92.4826
23.911	92.22
24.003	91.9485
24.094	91.6937
24.186	91.4291
24.278	91.2057
24.37	91.0734
24.463	90.896
24.554	90.7382
24.646	90.6226
24.738	90.5285
24.83	90.3903
24.922	90.1982
25.014	90.0571
25.106	89.9405
25.198	89.8023
25.29	89.6837
25.382	89.5691
25.473	89.4328
25.565	89.3505
25.658	89.2829
25.75	89.2574
25.842	89.23
25.934	89.1545
26.025	89.1251
26.117	88.9742
26.21	88.7782
26.302	88.5371
26.394	88.2304
26.485	87.8756
26.577	87.3758
26.669	85.9607
26.762	82.8012
26.854	78.8165
26.945	73.942
27.037	67.5112
27.129	58.6373
27.221	46.2531
27.313	29.7773
27.405	14.9362
27.497	5.67714
27.589	2.04722
27.681	1.26812
27.773	0.91042
27.864	0.7889
27.957	0.73696
28.049	0.74872
28.141	0.75558
28.233	0.72128
28.324	0.75656
28.416	0.76832
28.508	0.75264
28.601	0.91434
28.693	1.4406
28.784	3.85434
28.876	11.6512
28.968	22.5204
29.06	34.9321
29.153	48.5521
29.245	62.7994
29.336	75.7961
29.428	85.4883
29.52	90.8166
29.612	92.3679
29.704	92.1631
29.796	91.6398
29.888	91.1312
29.98	90.6833
30.072	90.2992
30.164	90.0836
30.255	89.9405
30.348	89.8297
30.44	89.6808
30.532	89.4975
30.624	89.2956
30.715	89.0928
30.807	88.8546
30.9	88.6871
30.992	88.6106
31.084	88.4979
31.175	88.3509
31.267	88.2147
31.359	88.0853
31.451	87.9726
31.544	87.8756
31.635	87.8188
31.727	87.7335
31.819	87.5699
31.911	87.3925
32.003	87.2367
32.095	87.1034
32.187	86.9534
32.279	86.8692
32.371	86.8417
32.463	86.7604
32.555	86.6898
32.646	86.682
32.739	86.6428
32.831	86.5673
32.923	86.5624
33.015	86.5164
33.106	86.4497
33.198	86.3145
33.291	86.1949
33.383	86.0303
33.475	85.7039
33.566	84.9748
33.658	83.4078
33.75	80.5041
33.842	75.2875
33.935	69.1802
34.026	61.6302
34.118	50.7542
34.21	35.4662
34.302	21.3473
34.394	11.0299
34.486	2.83808
34.578	1.70128
34.67	0.70266
34.762	0.54096
34.854	0.48706
34.945	0.42924
35.037	0.42826
35.13	0.441
35.222	0.41846
35.314	0.4361
35.406	0.39396
35.497	0.392
35.589	0.41258
35.682	0.45668
35.774	0.58016
35.866	0.85848
35.957	1.81202
36.049	5.53798
36.141	13.4642
36.234	26.2738
36.326	42.4017
36.417	56.7616
36.509	69.285
36.601	79.9729
36.693	87.9472
36.785	91.8309
36.877	92.6864
36.969	92.4993
37.061	92.268
37.153	91.9877
37.245	91.7055
37.336	91.434
37.429	91.0538
37.521	90.6951
37.613	90.4119
37.705	90.1022
37.796	89.8689
37.888	89.7014
37.98	89.4946
38.073	89.2986
38.165	89.1241
38.256	88.933
38.348	88.7821
38.44	88.6939
38.532	88.6204
38.625	88.5812
38.717	88.5548
38.808	88.5205
38.9	88.3793
38.992	88.247
39.084	88.1843
39.176	88.1079
39.268	88.0148
39.36	87.9168
39.452	87.8639
39.544	87.81
39.636	87.7306
39.727	87.7218
39.82	87.761
39.912	87.7022
40.004	87.6316
40.096	87.5032
40.187	87.2994
40.279	86.9299
40.372	86.1871
40.464	84.9787
40.556	82.4876
40.647	78.0296
40.739	72.7699
40.831	65.5659
40.923	55.6307
41.016	41.9597
41.107	24.5314
41.199	10.8221
41.291	4.16206
41.383	1.72676
41.475	1.4014
41.567	0.88396
41.659	0.72912
41.751	0.59976
41.843	0.44394
41.935	0.38906
42.027	0.34986
42.118	0.39298
42.211	0.42728
42.303	0.46844
42.395	0.5684
42.487	0.68894
42.578	0.85946
42.67	1.40826
42.763	3.59268
42.855	10.0871
42.947	22.6282
43.038	39.6508
43.13	55.0368
43.222	68.1786
43.314	79.1115
43.407	87.3895
43.498	92.3689
43.59	93.736
43.682	93.7762
43.774	93.7017
43.866	93.1666
43.958	92.5424
44.05	92.1229
44.142	91.7437
44.234	91.4262
44.326	91.1273
44.417	90.7999
44.509	90.5549
44.602	90.3521
44.694	90.1727
44.786	89.9728
44.877	89.7415
44.969	89.5279
45.061	89.3446
45.154	89.2653
45.246	89.1633
45.338	89.0085
45.429	88.886
45.521	88.7674
45.613	88.6733
45.706	88.5577
45.798	88.396
45.889	88.3264
45.981	88.2519
46.073	88.1863
46.165	88.1285
46.257	88.0677
46.349	88.0011
46.441	87.8854
46.533	87.7982
46.625	87.7433
46.717	87.6492
46.808	87.562
46.901	87.4709
46.993	87.3239
47.085	87.1779
47.177	87.0514
47.268	86.8839
47.36	86.4742
47.452	85.2718
47.545	82.5954
47.637	78.0413
47.728	71.9418
47.82	63.3011
47.912	50.7787
48.004	35.3858
48.097	19.1894
48.188	8.99346
48.28	3.67598
48.372	1.7248
48.464	1.2642
48.556	0.81046
48.647	0.59584
48.74	0.47236
48.832	0.4704
48.924	0.38906
49.016	0.35672
49.108	0.42238
49.199	0.47236
49.292	0.43218
49.384	0.44002
49.476	0.53116
49.568	0.58996
49.659	0.73402
49.751	1.38964
49.844	4.16402
49.936	10.4223
50.028	19.1492
50.119	32.3469
50.211	46.5147
50.303	59.4056
50.395	70.7766
50.488	80.264
50.579	87.0015
50.671	90.5226
50.763	91.8093
50.855	91.9554
50.947	91.7956
51.039	91.6614
51.131	91.4036
51.223	91.1253
51.315	91.042
51.407	91.0547
51.498	90.9724
51.59	90.9009
51.683	90.8431
51.775	90.7402
51.867	90.6216
51.958	90.5148
52.05	90.403
52.142	90.1767
52.235	89.9826
52.327	89.8787
52.419	89.7474
52.51	89.5553
52.602	89.4123
52.694	89.23
52.786	89.0399
52.879	88.9115
52.97	88.838
53.062	88.7998
53.154	88.7978
53.246	88.7233
53.338	88.6439
53.43	88.5793
53.522	88.4244
53.614	88.2206
53.706	88.0177
53.798	87.8178
53.889	87.613
53.981	87.3621
54.074	87.0926
54.166	86.6781
54.258	86.0381
54.349	84.9983
54.441	83.2304
54.533	80.3512
54.626	75.9382
54.718	69.872
54.809	61.5558
54.901	50.9002
54.993	37.8868
55.085	24.9704
55.178	15.581
55.269	7.9037
55.361	2.89394
55.453	1.65424
55.545	1.00156
55.637	0.8183
55.728	0.59388
55.821	0.45766
55.913	0.37632
56.005	0.35182
56.097	0.36554
56.188	0.32144
56.28	0.3038
56.373	0.30968
56.465	0.3381
56.557	0.46942
56.648	0.7742
56.74	1.29164
56.832	4.1013
56.924	12.0589
57.017	22.3107
57.108	34.3265
57.2	46.5598
57.292	58.1267
57.384	69.1459
57.476	78.6048
57.569	85.75
57.66	90.1894
57.752	92.1347
57.844	92.6757
57.936	92.5051
58.028	92.0161
58.119	91.4193
58.212	90.994
58.304	90.7353
58.396	90.4364
58.488	90.1169
58.579	89.8582
58.671	89.6171
58.764	89.3456
58.856	89.1555
58.948	88.9977
59.039	88.7958
59.131	88.6106
59.223	88.4646
59.316	88.3597
59.408	88.297
59.499	88.2274
59.591	88.1265
59.683	88.0344
59.775	87.9805
59.867	87.8482
59.959	87.7482
60.051	87.7012
60.143	87.5944
60.235	87.4915
60.327	87.4229
60.418	87.3151
60.511	87.1808
60.603	87.1102
60.695	87.023
60.787	86.9182
60.878	86.8162
60.97	86.7114
61.062	86.6065
61.155	86.5046
61.247	86.3772
61.339	86.1841
61.43	85.8333
61.522	85.2669
61.614	84.4701
61.707	82.9707
61.799	80.7981
61.89	78.8165
61.982	76.1568
62.074	72.3603
62.166	68.3344
62.258	62.4044
62.35	50.8502
62.442	35.9944
62.534	20.582
62.626	9.09538
62.718	3.92784
62.809	1.35338
62.902	0.9653
62.994	0.59388
63.086	0.43022
63.178	0.49294
63.269	0.4312
63.361	0.46256
63.453	0.47432
63.546	0.4655
63.638	0.47726
63.729	0.46942
63.821	0.4753
63.913	0.49196
64.005	0.51646
64.098	0.5782
64.189	0.87122
64.281	2.2295
64.373	8.0213
64.465	19.1237
64.557	33.2318
64.648	48.6423
64.741	62.2124
64.833	73.6147
64.925	82.7943
65.017	88.8723
65.108	91.3076
65.2	91.6614
65.293	91.436
65.385	91.0645
65.477	90.5677
65.568	90.1384
65.66	89.7709
65.752	89.4475
65.845	89.1428
65.937	88.8889
66.029	88.6498
66.12	88.4411
66.212	88.3
66.304	88.1863
66.396	88.0638
66.489	87.9736
66.58	87.8854
66.672	87.7972
66.764	87.71
66.856	87.6336
66.948	87.6032
67.04	87.5718
67.132	87.5316
67.224	87.4689
67.316	87.4268
67.408	87.3415
67.499	87.2337
67.591	87.1514
67.684	87.0201
67.776	86.8603
67.868	86.7349
67.959	86.6271
68.051	86.536
68.143	86.5124
68.236	86.4723
68.328	86.4184
68.419	86.3449
68.511	86.2498
68.603	86.0891
68.695	85.896
68.788	85.6638
68.879	85.2708
68.971	84.5975
69.063	83.3441
69.155	80.9676
69.247	77.6738
69.338	73.7156
69.431	69.041
69.523	62.8719
69.615	53.5413
69.707	41.4775
69.798	27.9182
69.89	16.221
69.983	8.86116
70.075	3.95234
70.167	1.5876
70.259	0.99372
70.35	0.47726
70.442	0.2842
70.534	0.245
70.627	0.2156
70.719	0.23128
70.81	0.22148
70.902	0.23716
70.994	0.24696
71.086	0.25088
71.179	0.2891
71.27	0.29694
71.362	0.25186
71.454	0.24108
71.546	0.30086
71.638	0.32732
71.729	0.40572
71.822	0.56546
71.914	1.17306
72.006	3.85924
72.098	12.1089
72.189	25.4467
72.281	41.9822
72.374	56.7665
72.466	69.6594
72.558	79.8259
72.649	86.877
72.741	90.8891
72.833	92.363
72.925	92.4395
73.018	92.1082
73.109	91.727
73.201	91.2968
73.293	90.8372
73.385	90.4746
73.477	90.1659
73.569	89.8934
73.661	89.6553
73.753	89.4995
73.845	89.3505
73.937	89.179
74.028	89.0595
74.12	88.9517
74.213	88.8301
74.305	88.7566
74.397	88.6763
74.488	88.5714
74.58	88.4303
74.672	88.3029
74.765	88.198
74.857	88.0403
74.948	87.8609
75.04	87.7531
75.132	87.663
75.224	87.6012
75.317	87.6679
75.408	87.6845
75.5	87.5728
75.592	87.5199
75.684	87.4885
75.776	87.4758
75.868	87.5316
75.96	87.5111
76.052	87.4327
76.144	87.3288
76.236	87.1994
76.328	87.0201
76.419	86.7604
76.512	86.3174
76.604	85.3894
76.696	83.5803
76.788	80.7853
76.879	77.7287
76.971	74.0978
77.063	69.5516
77.156	63.5314
77.248	54.0558
77.339	39.7449
77.431	24.746
77.523	13.4417
77.615	6.22986
77.708	3.29966
77.799	1.63562
77.891	1.4357
77.983	1.01136
78.075	0.784
78.167	0.66346
78.258	0.53606
78.351	0.40866
78.443	0.34398
78.535	0.33614
78.627	0.4018
78.718	0.46648
78.81	0.42042
78.903	0.40866
78.995	0.38514
79.087	0.41748
79.178	0.49882
79.27	0.58114
79.362	0.79086
79.455	2.04134
79.547	7.90468
79.638	19.8274
79.73	34.2843
79.822	49.4792
79.914	62.9846
80.006	74.138
80.098	82.5601
80.19	87.9609
80.282	90.209
80.374	90.6137
80.466	90.3168
80.557	89.8787
80.65	89.4221
80.742	89.1036
80.834	88.8429
80.926	88.6528
81.017	88.4764
81.109	88.2931
81.201	88.1167
81.294	87.9305
81.386	87.7365
81.478	87.562
81.569	87.3572
81.661	87.1406
81.753	86.9574
81.846	86.8153
81.938	86.6996
82.029	86.6202
82.121	86.5703
82.213	86.536
82.305	86.4585
82.397	86.3841
82.489	86.2674
82.581	86.0969
82.673	85.9421
82.765	85.8225
82.857	85.7343
82.948	85.6775
83.041	85.6638
83.133	85.6628
83.225	85.6393
83.317	85.5814
83.408	85.4756
83.5	85.3482
83.592	85.2081
83.685	85.0562
83.777	84.9072
83.868	84.7651
83.96	84.5524
84.052	84.3016
84.144	84.1487
84.237	83.9801
84.328	83.6116
84.42	82.7973
84.512	80.9137
84.604	77.0613
84.696	71.2764
84.788	65.0651
84.88	56.547
84.972	45.5053
85.064	34.3029
85.156	22.7585
85.247	14.2031
85.339	8.22906
85.432	5.39294
85.524	2.75086
85.616	1.8228
85.707	1.25832
85.799	0.77714
85.891	0.5586
85.984	0.392
86.076	0.2303
86.167	0.2303
86.259	0.24206
86.351	0.29302
86.443	0.39494
86.535	0.60564
86.627	1.01136
86.719	3.39276
86.811	12.4146
86.903	26.6599
86.995	42.8868
87.086	58.259
87.179	71.3567
87.271	81.5203
87.363	88.4009
87.455	91.4928
87.546	92.0543
87.638	91.8525
87.73	91.3487
87.823	90.6716
87.915	90.1296
88.006	89.7347
88.098	89.4093
88.19	89.0859
88.282	88.8047
88.375	88.5097
88.466	88.2774
88.558	88.1294
88.65	87.9883
88.742	87.8198
88.834	87.6071
88.925	87.4091
89.018	87.2327
89.11	87.1073
89.202	87.023
89.294	86.9074
89.385	86.7819
89.477	86.6349
89.57	86.4821
89.662	86.3076
89.754	86.1822
89.845	86.0685
89.937	85.9705
90.029	85.9166
90.122	85.8539
90.214	85.7618
90.306	85.7079
90.397	85.6344
90.489	85.4903
90.581	85.3815
90.673	85.2914
90.766	85.1571
90.857	85.0072
90.949	84.9199
91.041	84.8847
91.133	84.8023
91.225	84.6455
91.317	84.4417
91.409	84.1154
91.501	83.5146
91.593	82.3004
91.685	80.1522
91.776	77.2475
91.868	73.2873
91.961	67.7827
92.053	59.7771
92.145	48.9079
92.236	33.8257
92.328	17.3666
92.42	8.07226
92.513	3.3075
92.605	1.71794
92.696	1.09564
92.788	0.5978
92.88	0.392
92.972	0.37828
93.064	0.29694
93.156	0.2695
93.248	0.26558
93.34	0.26068
93.432	0.2891
93.524	0.32928
93.615	0.42336
93.708	0.6566
93.8	1.41904
93.892	5.08228
93.984	13.9679
94.075	26.066
94.167	40.3045
94.26	54.6673
94.352	67.3652
94.444	77.5013
94.535	85.0914
94.627	89.5044
94.719	90.895
94.811	90.7304
94.904	90.1179
94.995	89.4025
95.087	88.8938
95.179	88.5989
95.271	88.297
95.363	88.0226
95.455	87.8198
95.547	87.6218
95.639	87.4042
95.731	87.218
95.823	87.0593
95.914	86.9103
96.006	86.7643
96.099	86.6408
96.191	86.5252
96.283	86.4193
96.374	86.3566
96.466	86.3076
96.558	86.2106
96.651	86.0714
96.743	85.9342
96.834	85.8441
96.926	85.7843
97.018	85.7177
97.11	85.6608
97.202	85.5932
97.294	85.4825
97.386	85.4305
97.478	85.4129
97.57	85.3335
97.662	85.2012
97.754	85.1228
97.846	85.0973
97.938	85.0728
98.03	85.0248
98.122	84.918
98.214	84.7259
98.305	84.5181
98.397	84.2829
98.49	84.0095
98.582	83.6273
98.674	82.6463
98.765	80.9431
98.857	78.7214
98.949	75.5619
99.042	70.3405
99.134	63.5138
99.225	54.6752
99.317	43.5287
99.409	30.5985
99.501	15.7888
99.594	7.5411
99.685	2.94
99.777	1.1711
99.869	1.02802
99.961	0.42238
100.053	0.38318
100.144	0.30674
100.237	0.23814
100.329	0.19992
100.421	0.1666
100.513	0.196
100.604	0.2499
100.696	0.23912
100.789	0.20776
100.881	0.2156
100.973	0.21952
101.064	0.20776
101.156	0.21266
101.248	0.2058
101.34	0.27146
101.433	0.41552
101.524	0.68796
101.616	1.51018
101.708	5.34786
101.8	13.8974
101.892	25.9808
101.984	41.6255
102.076	55.8002
102.168	67.3799
102.26	76.0549
102.352	82.5013
102.443	86.4027
102.535	87.806
102.628	87.9344
102.72	87.7835
102.812	87.5797
102.903	87.2514
102.995	87.0113
103.087	86.9378
103.18	86.8888
103.272	86.8319
103.363	86.7378
103.455	86.6536
103.547	86.5242
103.639	86.3468
103.732	86.0979
103.823	85.9372
103.915	85.8313
104.007	85.7529
104.099	85.6981
104.191	85.6373
104.282	85.5246
104.375	85.4099
104.467	85.2953
104.559	85.1669
104.651	85.0268
104.743	84.9876
104.834	84.9817
104.927	84.9268
105.019	84.8602
105.111	84.7974
105.203	84.723
105.294	84.6093
105.386	84.4878
105.478	84.4094
105.571	84.3094
105.663	84.1996
105.754	84.1075
105.846	83.9752
105.938	83.8517
106.03	83.739
106.123	83.6949
106.214	83.6087
106.306	83.4343
106.398	83.1883
106.49	82.7247
106.582	82.0701
106.673	81.4517
106.766	80.3776
106.858	77.9257
106.95	73.9508
107.042	67.7337
107.133	58.0719
107.225	46.4824
107.318	31.1934
107.41	16.8776
107.502	8.869
107.593	3.91118
107.685	1.92864
107.777	1.16228
107.869	0.64974
107.962	0.31556
108.053	0.17836
108.145	0.14014
108.237	0.16856
108.329	0.16758
108.421	0.18718
108.513	0.18718
108.605	0.17542
108.697	0.15974
108.789	0.16366
108.881	0.18718
108.972	0.23324
109.064	0.32928
109.157	0.50176
109.249	0.77616
109.341	1.36318
109.432	3.79162
109.524	9.0797
109.616	16.5924
109.709	29.8067
109.801	44.5547
109.892	56.9086
109.984	67.3329
110.076	75.9627
110.168	82.7865
110.261	86.976
110.352	88.7762
110.444	89.0938
110.536	88.7096
110.628	88.15
110.72	87.661
110.811	87.2376
110.904	86.9299
110.996	86.7026
111.088	86.5193
111.18	86.3253
111.271	86.1175
111.363	85.9205
111.456	85.749
111.548	85.5648
111.64	85.3756
111.731	85.2267
111.823	85.1404
111.915	85.0277
112.007	84.8837
112.1	84.7602
112.191	84.6681
112.283	84.6397
112.375	84.6269
112.467	84.5691
112.559	84.5309
112.651	84.4976
112.743	84.4103
112.835	84.3604
112.927	84.2604
113.019	84.1448
113.11	84.0428
113.202	83.9301
113.295	83.8361
113.387	83.7675
113.479	83.6783
113.57	83.644
113.662	83.5724
113.754	83.5097
113.847	83.5156
113.939	83.4852
114.03	83.3696
114.122	83.2079
114.214	83.0364
114.306	82.8169
114.399	82.5846
114.491	82.2857
114.582	81.7722
114.674	80.603
114.766	77.6621
114.858	73.2756
114.95	68.4951
115.042	62.4799
115.134	52.6691
115.226	39.8223
115.318	25.4888
115.41	13.5799
115.501	7.39214
115.594	3.74262
115.686	1.85906
115.778	1.21814
115.87	0.81046
115.961	0.42924
116.053	0.26656
116.145	0.16954
116.238	0.13426
116.33	0.1274
116.421	0.09996
116.513	0.08624
116.605	0.098
116.697	0.0784
116.79	0.11074
116.881	0.14798
116.973	0.23716
117.065	0.37632
117.157	0.70854
117.249	1.24754
117.34	3.98468
117.433	13.0546
117.525	27.3861
117.617	43.1778
117.709	56.4402
117.8	66.8674
117.892	74.8661
117.985	80.7001
118.077	84.476
118.169	86.2116
118.26	86.437
118.352	86.1636
118.444	85.848
118.536	85.6481
118.629	85.4433
118.72	85.1836
118.812	85.062
118.904	85.0522
118.996	85.0669
119.088	85.1463
119.18	85.1894
119.272	85.114
119.364	85.016
119.456	84.868
119.548	84.6985
119.639	84.5397
119.732	84.3898
119.824	84.2398
119.916	84.0683
120.008	83.8958
120.099	83.7988
120.191	83.7214
120.283	83.6107
120.376	83.5283
120.468	83.4656
120.56	83.3813
120.651	83.3314
120.743	83.2853
120.835	83.1912
120.928	83.151
121.02	83.1305
121.111	83.1128
121.203	83.0844
121.295	82.9952
121.387	82.8708
121.479	82.7473
121.571	82.6189
121.663	82.4533
121.755	82.3465
121.847	82.2357
121.939	82.1122
122.03	82.0858
122.123	81.9172
122.215	81.6409
122.307	81.2616
122.399	80.5286
122.49	79.3104
122.582	77.7062
122.674	75.7726
122.767	72.2015
122.859	66.6547
122.95	60.1426
123.042	51.4863
123.134	38.3944
123.226	23.0153
123.319	12.0795
123.41	5.92802
123.502	2.6656
123.594	1.5435
123.686	0.91238
123.778	0.67424
123.869	0.4557
123.962	0.33026
124.054	0.2891
124.146	0.28714
124.238	0.25186
124.329	0.2107
124.421	0.22246
124.514	0.2058
124.606	0.1862
124.698	0.1421
124.789	0.14798
124.881	0.1715
124.973	0.15484
125.066	0.14994
125.158	0.16562
125.25	0.16954
125.341	0.1666
125.433	0.16464
125.525	0.19208
125.617	0.21462
125.71	0.30772
125.801	0.4263
125.893	0.5782
125.985	0.94276
126.077	2.3422
126.169	7.76944
126.261	17.5832
126.353	30.4515
126.445	44.0588
126.537	55.4092
126.629	64.7417
126.72	72.3054
126.812	78.4225
126.905	82.7159
126.997	85.4531
127.089	86.7976
127.18	87.169
127.272	87.0799
127.364	86.6937
127.457	86.2263
127.549	85.8343
127.64	85.5785
127.732	85.4217
127.824	85.2365
127.916	85.0846
128.008	84.965
128.1	84.722
128.192	84.376
128.284	84.1987
128.376	84.0987
128.468	84.034
128.559	83.9968
128.652	83.8596
128.744	83.743
128.836	83.6685
128.928	83.546
129.019	83.4294
129.111	83.3764
129.204	83.4019
129.296	83.5479
129.388	83.5989
129.479	83.5754
129.571	83.5264
129.663	83.4431
129.755	83.3412
129.848	83.2588
129.939	83.204
130.031	83.1736
130.123	83.1677
130.215	83.1099
130.307	82.9982
130.399	82.8482
130.491	82.615
130.583	82.3014
130.675	81.9711
130.767	81.4537
130.858	80.5707
130.95	78.9978
131.043	76.1774
131.135	72.4269
131.227	68.063
131.318	62.9581
131.41	57.4897
131.502	50.272
131.595	40.5005
131.687	27.2019
131.778	14.9901
131.87	9.4031
131.962	4.18068
132.054	1.99332
132.146	1.12798
132.239	0.5978
132.33	0.38122
132.422	0.3087
132.514	0.2352
132.606	0.23814
132.698	0.23814
132.79	0.2597
132.882	0.2842
132.974	0.27636
133.066	0.28714
133.158	0.29008
133.249	0.26264
133.341	0.26852
133.434	0.25088
133.526	0.22344
133.618	0.2058
133.709	0.19502
133.801	0.18424
133.893	0.18718
133.986	0.18522
134.078	0.17934
134.169	0.19502
134.261	0.31752
134.353	0.4802
134.445	0.7399
134.538	2.36474
134.629	9.45308
134.721	20.4036
134.813	31.3972
134.905	43.9706
134.997	55.4562
135.088	65.3092
135.181	73.0061
135.273	79.0027
135.365	83.0893
135.457	85.1159
135.548	85.5952
135.64	85.3874
135.733	85.0356
135.825	84.7876
135.917	84.6191
136.008	84.4103
136.1	84.1163
136.192	83.8694
136.284	83.6538
136.377	83.449
136.468	83.2314
136.56	83.0481
136.652	82.8218
136.744	82.6895
136.836	82.6179
136.928	82.5111
137.02	82.3847
137.112	82.2877
137.204	82.1661
137.296	81.9309
137.387	81.7888
137.479	81.7291
137.572	81.6193
137.664	81.5174
137.756	81.3527
137.847	81.1724
137.939	81.0519
138.031	81.0176
138.124	81.0734
138.216	81.1695
138.307	81.2048
138.399	81.2665
138.491	81.2283
138.583	81.1136
138.676	80.9941
138.767	80.8569
138.859	80.6403
138.951	80.3747
139.043	80.0729
139.135	79.6799
139.226	79.0997
139.319	78.1148
139.411	76.3773
139.503	73.8548
139.595	71.244
139.686	67.8425
139.778	62.9964
139.871	56.4754
139.963	47.4673
140.055	35.4005
140.146	21.7864
140.238	10.7604
140.33	4.73928
140.422	2.03742
140.515	1.17894
140.607	0.8428
140.698	0.42532
140.79	0.25186
140.882	0.37828
140.974	0.35378
141.067	0.294
141.158	0.28616
141.25	0.2793
141.342	0.24206
141.434	0.21462
141.526	0.20776
141.617	0.2156
141.71	0.2156
141.802	0.21756
141.894	0.21168
141.986	0.17934
142.077	0.15484
142.169	0.18032
142.262	0.27832
142.354	0.45766
142.446	0.60172
142.537	0.99078
142.629	3.08896
142.721	10.5183
142.813	23.1829
142.906	38.5248
142.997	52.5486
143.089	64.0048
143.181	72.7258
143.273	78.8116
143.365	82.5483
143.457	84.672
143.549	85.3678
143.641	85.1738
143.733	84.6054
143.825	84.232
143.916	84.2094
144.008	84.328
144.101	84.1869
144.193	83.9488
144.285	83.7959
144.376	83.6548
144.468	83.4597
144.56	83.3725
144.653	83.2637
144.745	83.1069
144.836	82.9276
144.928	82.6522
145.02	82.3984
145.112	82.2151
145.205	82.026
145.296	81.8741
145.388	81.7673
145.48	81.6311
145.572	81.5301
145.664	81.4674
145.755	81.4409
145.848	81.4341
145.94	81.3723
146.032	81.2783
146.124	81.2645
146.215	81.3214
146.307	81.391
146.4	81.4331
146.492	81.437
146.584	81.4164
146.675	81.3704
146.767	81.341
146.859	81.2606
146.951	81.1381
147.044	80.9754
147.135	80.8167
147.227	80.7187
147.319	80.5834
147.411	80.3747
147.503	79.9474
147.595	78.9586
147.687	76.7222
147.779	72.9238
147.871	67.8258
147.963	61.9781
148.054	54.9016
148.146	45.7464
148.239	35.4887
148.331	24.4637
148.423	13.33
148.514	6.67576
148.606	3.23106
148.698	1.58368
148.791	1.16032
148.883	0.6909
148.974	0.41356
149.066	0.32046
149.158	0.30184
149.25	0.3234
149.343	0.30772
149.435	0.34006
149.526	0.32438
149.618	0.25088
149.71	0.23422
149.802	0.24892
149.893	0.2499
149.986	0.24696
150.078	0.2303
150.17	0.22834
150.262	0.25872
150.353	0.294
150.445	0.37436
150.538	0.45276
150.63	0.51842
150.722	0.67326
150.813	0.98686
150.905	1.75518
150.997	3.88766
151.089	9.11694
151.182	18.5053
151.273	32.2391
151.365	45.4808
151.457	56.6665
151.549	66.5489
151.641	74.4241
151.733	80.0533
151.825	83.5862
151.917	85.1943
152.009	85.4844
152.101	85.2992
152.192	85.0944
152.284	84.9454
152.377	84.6181
152.469	84.3564
152.561	84.1673
152.652	83.9546
152.744	83.7567
152.836	83.5656
152.929	83.3392
153.021	83.1285
153.112	82.9541
153.204	82.8286
153.296	82.6904
153.388	82.5856
153.48	82.5003
153.572	82.3043
153.664	82.1436
153.756	81.9888
153.848	81.8104
153.94	81.6928
154.031	81.6046
154.124	81.4792
154.216	81.3645
154.308	81.2841
154.4	81.2067
154.491	81.1058
154.583	81.1009
154.676	81.0979
154.768	81.0254
154.86	80.9313
154.951	80.8578
155.043	80.7765
155.135	80.7177
155.227	80.6089
155.32	80.4962
155.411	80.3894
155.503	80.2493
155.595	80.0288
155.687	79.7504
155.779	79.084
155.871	77.8071
155.963	76.245
156.055	73.3687
156.147	69.383
156.239	64.4066
156.33	59.7143
156.422	53.556
156.515	44.3401
156.607	33.7924
156.699	21.6815
156.79	11.2935
156.882	5.3802
156.974	2.44608
157.067	1.51998
157.159	0.9408
157.25	0.61544
157.342	0.48314
157.434	0.36358
157.526	0.2744
157.618	0.21952
157.71	0.1911
157.802	0.18424
157.894	0.18522
157.986	0.1813
158.078	0.20972
158.169	0.22932
158.262	0.21854
158.354	0.19796
158.446	0.22246
158.538	0.19306
158.629	0.13916
158.721	0.19502
158.813	0.36652
158.906	0.74284
158.998	1.68364
159.089	6.27298
159.181	16.3121
159.273	29.2324
159.365	44.4234
159.458	57.9111
159.549	68.1757
159.641	75.5903
159.733	80.2757
159.825	82.7512
159.917	83.4274
160.008	83.4343
160.101	83.3049
160.193	83.154
160.285	82.9315
160.377	82.5258
160.468	82.0603
160.56	81.6663
160.653	81.3371
160.745	81.0303
160.837	80.8529
160.928	80.6932
161.02	80.5335
161.112	80.4139
161.205	80.3678
161.297	80.3286
161.388	80.1689
161.48	80.0307
161.572	79.9161
161.664	79.6809
161.756	79.4653
161.848	79.3408
161.94	79.2644
162.032	79.1585
162.124	79.1007
162.216	79.088
162.307	78.9988
162.4	78.9312
162.492	78.8665
162.584	78.695
162.676	78.5784
162.767	78.5176
162.859	78.4382
162.951	78.3598
163.044	78.2814
163.136	78.1815
163.227	78.0472
163.319	77.8561
163.411	77.4122
163.503	76.6507
163.596	75.2865
163.687	73.1786
163.779	70.118
163.871	66.1461
163.963	61.446
164.055	54.4459
164.146	46.1227
164.239	36.9097
164.331	26.263
164.423	15.0949
164.515	7.24318
164.606	4.3414
164.698	1.91198
164.791	1.24852
164.883	1.08388
164.975	0.6125
165.066	0.56644
165.158	0.40866
165.25	0.30968
165.343	0.30968
165.435	0.33124
165.526	0.38808
165.618	0.34006
165.71	0.30282
165.802	0.24696
165.894	0.2793
165.986	0.23814
166.078	0.24206
166.17	0.25676
166.262	0.35574
166.354	0.45472
166.445	0.4557
166.538	0.4753
166.63	0.50568
166.722	0.59192
166.814	0.76244
166.905	1.33476
166.997	3.78868
167.089	9.32862
167.182	16.5924
167.274	27.9329
167.365	41.2766
167.457	54.3675
167.549	65.0338
167.641	73.0061
167.734	78.8008
167.825	82.711
167.917	84.3888
168.009	84.7269
168.101	84.7426
168.193	84.4525
168.284	84.0409
168.377	83.7606
168.469	83.5274
168.561	83.2637
168.653	83.0687
168.744	82.8717
168.836	82.567
168.929	82.2779
169.021	82.1103
169.113	81.8702
169.204	81.7379
169.296	81.6928
169.388	81.6095
169.48	81.4527
169.573	81.2557
169.664	81.0587
169.756	80.8921
169.848	80.753
169.94	80.5521
170.032	80.3247
170.124	80.1895
170.216	80.0856
170.308	79.9504
170.4	79.8524
170.492	79.7367
170.583	79.5927
170.676	79.4702
170.768	79.3722
170.86	79.2889
170.952	79.2026
171.043	79.1027
171.135	78.9939
171.227	78.7851
171.32	78.5519
171.412	78.2902
171.503	77.863
171.595	76.6007
171.687	73.5225
171.779	69.2037
171.872	64.6261
171.963	59.0136
172.055	51.449
172.147	41.1286
172.239	27.9947
172.331	14.9087
172.422	6.77082
172.515	2.7832
172.607	1.28478
172.699	0.99176
172.791	0.45668
172.882	0.31458
172.974	0.245
173.067	0.21462
173.159	0.24206
173.251	0.2401
173.342	0.196
173.434	0.17444
173.526	0.21952
173.618	0.26362
173.711	0.28322
173.802	0.29008
173.894	0.28714
173.986	0.26852
174.078	0.29204
174.17	0.29596
174.262	0.28616
174.354	0.26852
174.446	0.25578
174.538	0.245
174.63	0.24598
174.721	0.22834
174.813	0.25382
174.906	0.31458
174.998	0.41258
175.09	0.5488
175.181	0.69678
175.273	1.66796
175.365	6.54934
175.458	15.7427
175.55	25.1605
175.641	37.7222
175.733	50.3553
175.825	61.3274
175.917	69.9083
176.01	76.2352
176.101	80.6187
176.193	82.9041
176.285	83.3519
176.377	82.9501
176.469	82.5758
176.56	82.2583
176.653	81.8663
176.745	81.5086
176.837	81.3273
176.929	81.0744
177.02	80.6854
177.112	80.3865
177.205	80.1787
177.297	80.0209
177.389	79.9592
177.48	79.9925
177.572	79.9347
177.664	79.8024
177.756	79.626
177.849	79.3976
177.94	79.1977
178.032	79.0654
178.124	78.9576
178.216	78.8537
178.308	78.7597
178.4	78.696
178.492	78.7009
178.584	78.7802
178.676	78.7322
178.768	78.6087
178.859	78.4784
178.951	78.2991
179.044	78.1344
179.136	78.0776
179.228	77.9747
179.319	77.763
179.411	77.6023
179.503	77.5111
179.596	77.1133
179.688	76.3773
179.779	75.3385
179.871	73.4706
179.963	69.9005
180.055	64.7143
180.148	58.1463
180.239	50.0653
180.331	39.594
180.423	26.413
180.515	17.7341
180.607	10.1881
180.698	4.80984
180.791	3.28006
180.883	1.40042
180.975	1.23284
181.066	1.10936
181.158	0.67326
181.25	0.66934
181.343	0.60956
181.435	0.54096
181.526	0.47726
181.618	0.39788
181.71	0.37632
181.802	0.36064
181.894	0.32536
181.986	0.29498
182.078	0.2793
182.17	0.3136
182.262	0.3724
182.354	0.35868
182.445	0.33026
182.538	0.31164
182.63	0.31164
182.722	0.38122
182.814	0.47334
182.905	0.63406
182.997	0.8575
183.089	1.57878
183.182	4.53936
183.274	11.6561
183.365	21.1827
183.457	32.9153
183.549	44.9555
183.641	55.909
183.734	64.9828
[truncated: 3,497 more rows]

## Sheet: S05-Left hand
Time/s	Force/N
0	0
0.496	0
0.588	0
0.68	0
0.773	0.0098
0.865	0
0.956	0
1.048	0.00098
1.14	0.0098
1.232	0.03528
1.325	0.19012
1.416	0.36358
1.508	0.49686
1.6	3.0576
1.692	10.9829
1.784	18.7484
1.876	28.3759
1.968	40.133
2.06	50.7905
2.152	58.1699
2.244	62.3045
2.336	63.7568
2.428	63.9117
2.52	63.6706
2.612	63.3658
2.704	63.0934
2.796	62.7631
2.888	62.4172
2.979	62.18
3.072	61.9948
3.164	61.788
3.256	61.5901
3.348	61.3637
3.44	61.1589
3.531	61.0089
3.623	60.8756
3.716	60.7355
3.808	60.614
3.9	60.514
3.992	60.4131
4.083	60.2945
4.175	60.1867
4.268	60.1093
4.36	60.0397
4.452	59.9554
4.543	59.7653
4.635	59.3341
4.727	58.2345
4.819	56.5117
4.912	53.2836
5.004	46.9361
5.095	38.17
5.187	24.6098
5.279	10.9368
5.371	4.2287
5.464	1.9012
5.555	1.4014
5.647	0.98196
5.739	0.75166
5.831	0.60074
5.923	0.49392
6.016	0.5537
6.107	0.44394
6.199	0.37044
6.291	0.39886
6.383	0.44394
6.475	0.45472
6.567	0.41748
6.659	0.4165
6.751	0.4018
6.843	0.39984
6.935	0.392
7.027	0.4165
7.118	0.42336
7.211	0.38612
7.303	0.39298
7.395	0.39102
7.487	0.3724
7.579	0.36946
7.67	0.3871
7.762	0.37338
7.855	0.44296
7.947	0.54488
8.039	0.81046
8.131	2.14718
8.222	6.81786
8.314	15.0028
8.407	24.9518
8.499	35.0252
8.591	43.5522
8.682	50.1466
8.774	55.1867
8.866	58.9411
8.958	61.7753
9.051	63.555
9.143	64.1371
9.234	63.9783
9.326	63.6392
9.418	63.309
9.51	63.0542
9.603	62.7817
9.694	62.5661
9.786	62.3937
9.878	62.1879
9.97	61.9576
10.062	61.7812
10.155	61.5871
10.246	61.3676
10.338	61.1324
10.43	60.9442
10.522	60.7874
10.614	60.6532
10.705	60.4954
10.798	60.3739
10.89	60.2592
10.982	60.1779
11.074	60.1573
11.166	60.0554
11.257	59.8496
11.35	59.4821
11.442	58.7598
11.534	56.8998
11.626	53.4159
11.717	48.4786
11.809	39.6145
11.901	25.7397
11.994	11.8619
12.086	4.21792
12.178	1.24362
12.269	1.04762
12.361	0.7399
12.453	0.3577
12.546	0.16072
12.638	0.1911
12.73	0.22246
12.821	0.20874
12.913	0.16268
13.005	0.12348
13.097	0.11172
13.19	0.1029
13.281	0.1078
13.373	0.11172
13.465	0.10192
13.557	0.1029
13.649	0.10094
13.742	0.09996
13.833	0.0931
13.925	0.09114
14.017	0.09212
14.109	0.1029
14.201	0.098
14.294	0.08918
14.385	0.07644
14.477	0.0686
14.569	0.07252
14.661	0.07742
14.753	0.07644
14.844	0.0833
14.937	0.08624
15.029	0.08232
15.121	0.0784
15.213	0.08036
15.305	0.10584
15.396	0.147
15.489	0.23716
15.581	0.37436
15.673	0.70952
15.765	2.62738
15.856	8.66516
15.948	17.5498
16.04	27.5762
16.133	37.7653
16.225	46.5843
16.317	53.5541
16.408	58.8931
16.5	62.1389
16.592	63.1679
16.685	62.9895
16.777	62.6436
16.868	62.4162
16.96	62.23
17.052	62.0105
17.144	61.791
17.236	61.6665
17.329	61.5342
17.42	61.3813
17.512	61.248
17.604	61.1001
17.696	60.9531
17.788	60.8541
17.881	60.7492
17.972	60.6159
18.064	60.468
18.156	60.3396
18.248	60.2034
18.34	60.0818
18.432	59.9466
18.524	59.83
18.616	59.68
18.708	59.537
18.8	59.5027
18.892	59.4311
18.983	59.3155
19.076	59.2684
19.168	59.24
19.26	59.1361
19.352	59.0078
19.443	58.9872
19.535	58.9715
19.628	58.5913
19.72	57.7416
19.812	55.909
19.904	52.4418
19.995	47.479
20.087	40.4368
20.179	30.4947
20.272	18.3084
20.364	8.94936
20.455	3.13306
20.547	1.1074
20.639	1.07212
20.731	0.7595
20.824	0.32438
20.916	0.31164
21.007	0.22932
21.099	0.17934
21.191	0.18424
21.283	0.1421
21.376	0.15484
21.467	0.15386
21.559	0.16268
21.651	0.16366
21.743	0.14504
21.835	0.1323
21.927	0.1372
22.019	0.1372
22.111	0.12936
22.203	0.12348
22.295	0.12936
22.387	0.13132
22.478	0.11858
22.571	0.11858
22.663	0.1127
22.755	0.10388
22.847	0.10682
22.939	0.11956
23.03	0.12936
23.122	0.13132
23.215	0.14406
23.307	0.17052
23.399	0.2205
23.49	0.34202
23.582	0.50568
23.674	1.62092
23.767	7.82236
23.859	19.0806
23.951	30.0135
24.042	39.6684
24.134	47.9024
24.226	54.3067
24.318	59.0862
24.411	62.0007
24.502	62.8405
24.594	62.5769
24.686	62.2055
24.778	61.9203
24.87	61.6057
24.963	61.2833
25.054	60.9393
25.146	60.6875
25.238	60.4856
25.33	60.27
25.422	60.0485
25.513	59.9035
25.606	59.8212
25.698	59.7369
25.79	59.6261
25.882	59.4419
25.974	59.3135
26.065	59.2988
26.158	59.2861
26.25	59.1979
26.342	59.0793
26.434	58.9156
26.525	58.8118
26.617	58.7696
26.71	58.7451
26.802	58.8745
26.894	59.0685
26.986	58.9725
27.077	58.7971
27.169	58.409
27.261	56.8772
27.354	53.4521
27.446	48.1797
27.537	39.7037
27.629	27.3959
27.721	13.5965
27.813	5.62618
27.906	2.00116
27.998	1.26224
28.089	0.9065
28.181	0.5047
28.273	0.31948
28.365	0.3675
28.457	0.21658
28.55	0.24108
28.641	0.2597
28.733	0.20384
28.825	0.20286
28.917	0.20776
29.009	0.20776
29.101	0.2107
29.193	0.19894
29.285	0.18718
29.377	0.2009
29.469	0.18718
29.561	0.18816
29.652	0.19796
29.745	0.19992
29.837	0.196
29.929	0.196
30.021	0.19012
30.112	0.18718
30.204	0.1862
30.297	0.18914
30.389	0.18032
30.481	0.18228
30.573	0.18326
30.664	0.18032
30.756	0.18816
30.849	0.18424
30.941	0.17836
31.033	0.17444
31.124	0.17934
31.216	0.19012
31.308	0.18816
31.4	0.17934
31.493	0.18816
31.585	0.1764
31.676	0.16856
31.768	0.17738
31.86	0.20874
31.952	0.29106
32.045	0.48118
32.136	1.43472
32.228	6.25338
32.32	15.4125
32.412	24.4343
32.504	33.2632
32.596	41.4883
32.688	48.0592
32.78	52.9641
32.872	56.5705
32.964	59.093
33.056	60.8404
33.147	61.9546
33.24	62.4358
33.332	62.3211
33.424	61.9007
33.516	61.4264
33.608	61.1118
33.699	60.9227
33.792	60.7375
33.884	60.5503
33.976	60.3817
34.068	60.2024
34.159	60.0642
34.251	59.927
34.343	59.7496
34.436	59.5654
34.528	59.4488
34.619	59.3341
34.711	59.2057
34.803	59.0509
34.895	58.7667
34.988	58.5815
35.08	58.4825
35.171	58.3668
35.263	58.2698
35.355	58.1561
35.447	57.9876
35.539	57.8641
35.631	57.7279
35.723	57.5652
35.815	57.4564
35.907	57.3506
35.999	57.2006
36.091	56.9017
36.183	55.9345
36.275	53.949
36.367	52.0351
36.459	49.3263
36.551	42.5144
36.643	28.9619
36.734	13.2751
36.827	4.28456
36.919	1.37886
37.011	0.67326
37.103	0.69188
37.194	0.38318
37.286	0.14798
37.379	0.14896
37.471	0.16268
37.563	0.18032
37.655	0.15876
37.746	0.12446
37.838	0.13622
37.931	0.13328
38.023	0.14014
38.115	0.12838
38.206	0.11466
38.298	0.10486
38.39	0.12446
38.482	0.12936
38.575	0.11858
38.667	0.1029
38.758	0.10486
38.85	0.12054
38.942	0.12152
39.034	0.11466
39.127	0.11466
39.218	0.10584
39.31	0.11074
39.402	0.11368
39.494	0.10388
39.586	0.1078
39.677	0.10878
39.77	0.09506
39.862	0.0931
39.954	0.12054
40.046	0.12054
40.138	0.1225
40.229	0.147
40.322	0.1617
40.414	0.16366
40.506	0.23814
40.598	0.2842
40.69	0.35574
40.781	0.64484
40.873	1.67384
40.966	4.9245
41.058	12.2774
41.15	22.5459
41.241	33.3504
41.333	43.0592
41.425	50.2818
41.518	55.3671
41.61	59.0381
41.702	61.591
41.793	62.9258
41.885	63.2472
41.977	63.0826
42.07	62.7896
42.162	62.5289
42.253	62.2761
42.345	62.033
42.437	61.8419
42.529	61.6547
42.621	61.4509
42.714	61.2696
42.805	61.1236
42.897	60.9756
42.989	60.8159
43.081	60.6522
43.173	60.5013
43.265	60.3523
43.357	60.2112
43.449	60.1357
43.541	60.0985
43.633	60.0613
43.724	60.0005
43.816	59.9211
43.909	59.8065
44.001	59.6938
44.093	59.5281
44.185	59.4086
44.276	59.2959
44.368	59.192
44.461	59.1263
44.553	59.0381
44.645	58.9156
44.736	58.7363
44.828	58.3296
44.92	57.1859
45.012	55.1554
45.105	53.2875
45.197	51.3295
45.288	49.1205
45.38	45.7866
45.472	40.2251
45.564	33.4131
45.657	25.2252
45.748	15.2782
45.84	7.01876
45.932	2.99684
46.024	1.30536
46.116	1.029
46.209	0.76832
46.3	0.47236
46.392	0
46.484	0.19796
46.576	0.10584
46.668	0.15876
46.76	0.18326
46.852	0.18032
46.944	0.1813
47.036	0.16366
47.128	0.15876
47.22	0.14014
47.311	0.14308
47.404	0.1568
47.496	0.13818
47.588	0.14994
47.68	0.14994
47.771	0.13426
47.863	0.13328
47.955	0.13622
48.048	0.1421
48.14	0.1225
48.232	0.12544
48.323	0.14896
48.415	0.13818
48.507	0.11564
48.6	0.12054
48.692	0.13818
48.784	0.17934
48.875	0.19208
48.967	0.18816
49.059	0.27832
49.152	0.46844
49.244	1.29066
49.335	5.54386
49.427	13.5554
49.519	20.9593
49.611	28.8904
49.703	37.2077
49.796	44.6067
49.887	50.1456
49.979	54.4645
50.071	58.014
50.163	60.517
50.255	61.4048
50.347	61.3823
50.439	61.0707
50.531	60.7904
50.623	60.662
50.715	60.5081
50.807	60.3112
50.898	60.1132
50.991	59.9858
51.083	59.8662
51.175	59.6791
51.267	59.4703
51.358	59.2371
51.45	59.0587
51.543	58.9235
51.635	58.799
51.727	58.7236
51.819	58.7069
51.91	58.654
52.002	58.5864
52.094	58.5854
52.187	58.6256
52.279	58.5746
52.37	58.5109
52.462	58.4678
52.554	58.4305
52.646	58.3835
52.739	58.3472
52.831	58.2718
52.922	58.1689
53.014	58.0807
53.106	57.9552
53.198	57.5985
53.291	56.7087
53.383	54.9898
53.474	50.1113
53.566	40.5289
53.658	30.2016
53.75	17.4107
53.842	7.25004
53.934	2.8126
54.026	0.90748
54.118	0.90258
54.21	0.7497
54.302	0.2891
54.394	0.09506
54.486	0.0588
54.578	0.15778
54.67	0.20482
54.762	0.2009
54.854	0.17052
54.946	0.14798
55.037	0.1372
55.13	0.14504
55.222	0.16562
55.314	0.15386
55.406	0.1372
55.498	0.12936
55.589	0.11858
55.682	0.11074
55.774	0.10682
55.866	0.10682
55.958	0.11368
56.049	0.10976
56.141	0.1029
56.233	0.10878
56.326	0.12152
56.418	0.1176
56.51	0.11172
56.601	0.10878
56.693	0.10976
56.785	0.11368
56.878	0.1127
56.97	0.11172
57.062	0.10388
57.153	0.10094
57.245	0.10976
57.337	0.10094
57.43	0.10584
57.522	0.14014
57.613	0.18228
57.705	0.28812
57.797	0.44688
57.889	1.82868
57.981	9.19436
58.074	21.6315
58.165	32.3371
58.257	41.1796
58.349	48.4081
58.441	53.7265
58.533	57.8808
58.626	60.9207
58.717	62.2584
58.809	62.3682
58.901	62.1908
58.993	61.9595
59.085	61.7253
59.177	61.5087
59.269	61.252
59.361	61.0334
59.453	60.8443
59.545	60.6836
59.637	60.5277
59.728	60.3602
59.821	60.1985
59.913	60.0407
60.005	59.8947
60.097	59.8143
60.189	59.8153
60.28	59.7702
60.372	59.6781
60.465	59.5918
60.557	59.5046
60.649	59.4125
60.74	59.3214
60.832	59.2704
60.924	59.2067
61.017	59.1077
61.109	59.0695
61.201	59.0705
61.292	59.0254
61.384	58.9294
61.476	58.8764
61.569	58.8608
61.661	58.6354
61.753	57.5505
61.844	54.5154
61.936	49.3508
62.028	42.6378
62.12	34.5107
62.213	22.3342
62.304	12.693
62.396	6.2916
62.488	2.62248
62.58	1.92962
62.672	0.86044
62.765	0.66248
62.856	0.60074
62.948	0.31752
63.04	0.1176
63.132	0.16562
63.224	0.17934
63.316	0.15974
63.408	0.19306
63.5	0.18914
63.592	0.17738
63.684	0.14602
63.776	0.15582
63.867	0.16072
63.96	0.17248
64.052	0.16758
64.144	0.14896
64.236	0.16366
64.328	0.1617
64.419	0.15092
64.512	0.1519
64.604	0.147
64.696	0.15582
64.788	0.147
64.879	0.16268
64.971	0.15386
65.063	0.15288
65.156	0.14798
65.248	0.15484
65.34	0.14896
65.431	0.15484
65.523	0.15092
65.615	0.15974
65.708	0.1617
65.8	0.16268
65.892	0.23226
65.983	0.35672
66.075	0.55076
66.167	1.69442
66.259	6.45036
66.352	13.5838
66.443	20.9083
66.535	28.3965
66.627	35.8386
66.719	42.8681
66.811	48.5619
66.904	52.9641
66.995	56.3294
67.087	58.8931
67.179	60.7365
67.271	61.8027
67.363	62.0654
67.456	61.9007
67.547	61.6645
67.639	61.3931
67.731	61.0922
67.823	60.8061
67.915	60.5542
68.006	60.3151
68.099	60.0965
68.191	59.8996
68.283	59.6967
68.375	59.5066
68.467	59.3331
68.558	59.19
68.651	59.0773
68.743	58.9793
68.835	58.8735
68.927	58.7588
69.019	58.6667
69.11	58.5521
69.202	58.4472
69.295	58.3423
69.387	58.2326
69.479	58.067
69.57	57.8024
69.662	57.2536
69.754	56.1452
69.847	53.2601
69.939	46.989
70.031	39.9899
70.122	32.1411
70.214	21.4277
70.306	11.4787
70.398	4.8608
70.491	1.97568
70.583	1.07114
70.674	0.8134
70.766	0.50274
70.858	0.24108
70.95	0.14602
71.043	0.23814
71.134	0.20972
71.226	0.14896
71.318	0.18424
71.41	0.18816
71.502	0.1715
71.595	0.17444
71.686	0.16954
71.778	0.196
71.87	0.1862
71.962	0.1764
72.054	0.17444
72.146	0.15974
72.238	0.1666
72.33	0.1813
72.422	0.17934
72.514	0.17836
72.606	0.1715
72.697	0.15778
72.79	0.147
72.882	0.15484
72.974	0.15582
73.066	0.16366
73.158	0.1862
73.249	0.16366
73.341	0.14896
73.434	0.13132
73.526	0.11074
73.618	0.15288
73.71	0.16464
73.801	0.1862
73.893	0.15582
73.986	0.12544
74.078	0.16464
74.17	0.18228
74.262	0.17444
74.353	0.16268
74.445	0.14406
74.537	0.14504
74.63	0.16464
74.722	0.15484
74.813	0.23226
74.905	0.3626
74.997	0.85064
75.089	4.97056
75.182	15.8858
75.274	26.6207
75.365	35.8229
75.457	43.4885
75.549	49.2381
75.641	53.7569
75.734	57.5025
75.826	60.1838
75.917	61.4676
76.009	61.6851
76.101	61.6018
76.193	61.4313
76.285	61.25
76.377	61.0246
76.469	60.7718
76.561	60.5209
76.653	60.2867
76.745	60.0779
76.837	59.9152
76.929	59.7751
77.021	59.6261
77.113	59.4733
77.205	59.3145
77.297	59.1606
77.389	59.0136
77.48	58.849
77.573	58.6902
77.665	58.5785
77.757	58.4766
77.849	58.3561
77.94	58.1944
78.032	57.9807
78.125	57.7818
78.217	57.6759
78.309	57.6407
78.401	57.5525
78.492	57.4035
78.584	57.2251
78.676	57.0546
78.769	56.9164
78.861	56.8586
78.953	56.7391
79.044	56.4745
79.136	56.2167
79.228	55.9423
79.321	55.2318
79.413	54.2165
79.505	53.409
79.596	52.2262
79.688	50.3985
79.78	48.4884
79.873	45.7317
79.965	40.5857
80.056	33.2563
80.148	22.6351
80.24	11.2602
80.332	5.0029
80.424	1.94432
80.517	1.41218
80.608	0.97902
80.7	0.6027
80.792	0.343
80.884	0.3479
80.976	0.07546
81.069	0.00196
81.16	0.15092
81.252	0.1764
81.344	0.1323
81.436	0.1323
81.528	0.13132
81.619	0.12348
81.712	0.1323
81.804	0.1421
81.896	0.1225
81.988	0.12152
82.08	0.1176
82.171	0.12348
82.264	0.1274
82.356	0.11074
82.448	0.10976
82.54	0.09212
82.632	0.07546
82.723	0.08134
82.816	0.10388
82.908	0.10682
83	0.1029
83.092	0.10584
83.183	0.08624
83.275	0.0637
83.367	0.06958
83.46	0.08428
83.552	0.09996
83.644	0.09212
83.735	0.08918
83.827	0.0882
83.919	0.12936
84.012	0.21462
84.104	0.30184
84.196	0.44198
84.287	0.8918
84.379	3.11836
84.471	7.59402
84.563	12.1099
84.656	17.6469
84.747	25.4261
84.839	33.8913
84.931	42.3928
85.023	49.5625
85.115	54.882
85.208	58.5599
85.299	60.3112
85.391	60.6189
85.483	60.4121
85.575	60.1583
85.667	59.9192
85.758	59.6614
85.851	59.4311
85.943	59.2479
86.035	59.0764
86.127	58.9156
86.219	58.7402
86.31	58.5717
86.403	58.3884
86.495	58.2091
86.587	58.0934
86.679	57.9807
86.771	57.8553
86.862	57.7396
86.955	57.6358
87.047	57.5485
87.139	57.4574
87.231	57.3623
87.322	57.2653
87.414	57.1908
87.506	57.1262
87.599	57.0634
87.691	57.0086
87.783	56.9302
87.874	56.8518
87.966	56.7449
88.058	56.6068
88.151	56.3569
88.243	55.9845
88.335	55.4572
88.426	54.4821
88.518	52.9984
88.61	51.4343
88.702	49.0882
88.795	45.8336
88.886	42.5055
88.978	37.875
89.07	30.2438
89.162	18.9885
89.254	8.43486
89.347	2.79594
89.438	1.08192
89.53	0.98098
89.622	0.60662
89.714	0.2009
89.806	0
89.899	0
89.99	0
90.082	0
90.174	0
90.266	0
90.358	0
90.449	0
90.542	0
90.634	0
90.726	0
90.818	0
90.91	0
91.001	0
91.094	0
91.186	0
91.278	0
91.37	0
91.462	0
91.553	0
91.645	0
91.738	0
91.83	0
91.922	0
92.013	0
92.105	0
92.197	0
92.29	0
92.382	0
92.474	0
92.565	0
92.657	0
92.749	0
92.841	0
92.934	0
93.025	0
93.117	0
93.209	0
93.301	0
93.393	0
93.486	0
93.577	0
93.669	0
93.761	0
93.853	0
93.945	0.19012
94.038	0.47432
94.129	1.32692
94.221	6.26416
94.313	16.9422
94.405	27.5517
94.497	37.2537
94.588	45.5053
94.681	51.9851
94.773	56.8802
94.865	59.8408
94.957	60.8286
95.049	60.8178
95.14	60.5032
95.233	60.2004
95.325	59.929
95.417	59.6987
95.509	59.5027
95.601	59.2792
95.692	59.0176
95.784	58.6893
95.877	58.4443
95.969	58.2737
96.061	58.1052
96.152	57.9445
96.244	57.8171
96.336	57.7024
96.429	57.5789
96.521	57.4456
96.613	57.3271
96.704	57.2438
96.796	57.1634
96.888	57.0762
96.98	56.9762
97.073	56.889
97.165	56.7881
97.256	56.6901
97.348	56.6175
97.44	56.5333
97.532	56.4284
97.625	56.3206
97.716	56.1001
97.808	55.7101
97.9	55.2602
97.992	54.9956
98.084	54.7702
98.177	54.4586
98.268	53.6893
98.36	51.2089
98.452	45.0526
98.544	33.4621
98.636	18.228
98.728	7.29904
98.82	3.05074
98.912	1.03096
99.004	0.8575
99.096	0.78498
99.188	0.41846
99.279	0.26754
99.372	0.24892
99.464	0.1568
99.556	0.09996
99.648	0.17444
99.74	0.1813
99.831	0.18522
99.923	0.16366
100.016	0.15484
100.108	0.15288
100.2	0.17346
100.292	0.17346
100.383	0.15778
100.475	0.16562
100.568	0.15092
100.66	0.14896
100.752	0.15288
100.843	0.13916
100.935	0.1421
101.027	0.1519
101.12	0.14994
101.212	0.13818
101.304	0.14602
101.395	0.16072
101.487	0.1666
101.579	0.16268
101.671	0.1274
101.764	0.11662
101.855	0.1127
101.947	0.12446
102.039	0.12348
102.131	0.15288
102.223	0.15386
102.316	0.15288
102.407	0.19502
102.499	0.29596
102.591	0.38318
102.683	0.58016
102.775	1.67972
102.867	4.71772
102.959	8.38586
103.051	13.0889
103.143	19.2629
103.235	26.3816
103.327	34.5979
103.418	43.2131
103.511	50.0986
103.603	55.2269
103.695	58.6579
103.787	60.515
103.879	60.809
103.97	60.3905
104.062	59.8839
104.155	59.389
104.247	59.0038
104.339	58.6746
104.431	58.3208
104.522	57.9327
104.614	57.6485
104.707	57.4133
104.799	57.1605
104.891	56.9409
104.982	56.7812
105.074	56.6469
105.166	56.5431
105.259	56.4911
105.351	56.4431
105.443	56.3706
105.534	56.2687
105.626	56.1805
105.718	56.1109
105.81	56.0109
105.903	55.9247
105.994	55.8345
106.086	55.7493
106.178	55.664
106.27	55.5925
106.362	55.5131
106.455	55.3769
106.546	55.176
106.638	54.8457
106.73	54.1558
106.822	52.919
106.914	50.714
107.005	46.9332
107.098	42.1449
107.19	35.6857
107.282	26.2268
107.374	15.0528
107.466	6.38078
107.557	2.07466
107.65	1.06232
107.742	0.84672
107.834	0.47922
107.926	0.15974
108.018	0.12838
108.109	0.196
108.201	0.1715
108.294	0.1862
108.386	0.14994
108.478	0.147
108.569	0.18914
108.661	0.18424
108.753	0.16464
108.846	0.18424
108.938	0.16856
109.03	0.15582
109.121	0.147
109.213	0.15386
109.305	0.1666
109.398	0.16366
109.49	0.15484
109.582	0.16072
109.673	0.1617
109.765	0.15974
109.857	0.1617
109.949	0.17346
110.042	0.1617
110.133	0.16268
110.225	0.1568
110.317	0.15386
110.409	0.15582
110.501	0.1519
110.594	0.15288
110.685	0.16464
110.777	0.1862
110.869	0.17836
110.961	0.17836
111.053	0.2401
111.145	0.39886
111.237	0.72324
111.329	2.44902
111.421	7.25592
111.513	13.8993
111.605	21.656
111.696	30.0997
111.789	38.2543
111.881	45.6415
111.973	51.6911
112.065	56.2079
112.157	58.7618
112.248	59.5389
112.34	59.5174
112.433	59.3958
112.525	59.2204
112.617	59.0097
112.709	58.7882
112.8	58.5756
112.892	58.3806
112.985	58.162
113.077	57.9376
113.169	57.7583
113.26	57.6064
113.352	57.4878
113.444	57.3663
113.537	57.2242
113.629	57.0909
113.721	56.9841
113.812	56.8919
113.904	56.7959
113.996	56.6891
114.088	56.5989
114.181	56.5225
114.272	56.4333
114.364	56.3304
114.456	56.254
114.548	56.1844
114.64	56.1119
114.733	56.0511
114.824	55.9698
114.916	55.8825
115.008	55.8012
115.1	55.7326
115.192	55.6865
115.284	55.7424
115.376	55.7551
115.468	55.666
115.56	55.5974
115.652	55.5278
115.744	55.2504
115.835	54.4958
115.928	53.2405
116.02	51.7019
116.112	49.3646
116.204	45.9816
116.296	41.6774
116.387	34.9174
116.48	24.0776
116.572	11.3513
116.664	3.7191
116.756	1.34358
116.847	1.15542
116.939	0.71834
117.031	0.3969
117.124	0.2695
117.216	0.22932
117.308	0.16366
117.399	0.25284
117.491	0.24304
117.583	0.16464
117.676	0.17444
117.768	0.19698
117.86	0.1862
117.951	0.18326
118.043	0.19208
118.135	0.17738
118.227	0.1911
118.32	0.17052
118.411	0.17934
118.503	0.1764
118.595	0.18718
118.687	0.17248
118.779	0.16856
118.872	0.16954
118.963	0.16562
119.055	0.17052
119.147	0.18424
119.239	0.1862
119.331	0.15386
119.424	0.16268
119.515	0.1715
119.607	0.16366
119.699	0.20286
119.791	0.26264
119.883	0.3087
119.975	0.36652
120.067	0.49098
120.159	1.82574
120.251	7.44702
120.343	15.2459
120.435	23.2887
120.526	32.1391
120.619	40.1261
120.711	46.8322
120.803	52.3418
120.895	56.4852
120.987	58.8078
121.078	59.2645
121.17	58.9127
121.263	58.6363
121.355	58.3874
121.447	58.1405
121.539	57.7886
121.63	57.4603
121.722	57.2046
121.815	56.9752
121.907	56.7195
121.999	56.5019
122.091	56.3402
122.182	56.1912
122.274	56.0413
122.366	55.909
122.459	55.8237
122.551	55.6934
122.642	55.5415
122.734	55.4249
122.826	55.3239
122.918	55.2093
123.011	55.1103
123.103	55.0025
123.194	54.8731
123.286	54.7506
123.378	54.5409
123.47	54.2979
123.563	54.0989
123.655	53.8265
123.746	53.3865
123.838	52.6848
123.93	51.9322
124.022	51.2138
124.114	50.3142
124.207	49.6654
124.298	49.3665
124.39	49.147
124.482	48.8069
124.574	48.0474
124.666	45.6631
124.758	37.3106
124.85	26.2924
124.942	17.4362
125.034	7.40194
125.126	3.26536
125.218	1.33672
125.309	0.80164
125.402	0.70756
125.494	0.46452
125.586	0.17542
125.678	0.24794
125.77	0.14994
125.861	0.16464
125.954	0.17346
126.046	0.13622
126.138	0.11368
126.23	0.14798
126.321	0.13622
126.413	0.1372
126.505	0.14112
126.598	0.11956
126.69	0.12446
126.782	0.1176
126.873	0.13328
126.965	0.11858
127.057	0.10584
127.15	0.12446
127.242	0.13034
127.334	0.11564
127.425	0.09114
127.517	0.11564
127.609	0.11466
127.702	0.1176
127.794	0.1127
127.886	0.12544
127.977	0.11662
128.069	0.11172
128.161	0.10584
128.253	0.10976
128.346	0.10584
128.437	0.09996
128.529	0.12348
128.621	0.1372
128.713	0.14308
128.805	0.18228
128.898	0.21364
128.989	0.26558
129.081	0.5292
129.173	2.7195
129.265	10.6497
129.357	20.042
129.449	28.2064
129.541	36.1522
129.633	43.3356
129.725	49.394
129.817	54.1548
129.909	57.624
130.001	59.7055
130.093	60.4033
130.185	60.3063
130.277	59.9936
130.369	59.6957
130.461	59.4272
130.552	59.1744
130.644	58.9196
130.737	58.7
130.829	58.5109
130.921	58.3267
131.013	58.1679
131.104	58.0013
131.196	57.868
131.289	57.7749
131.381	57.6367
131.473	57.4946
131.565	57.379
131.656	57.2732
131.748	57.1654
131.841	57.0674
131.933	57.0125
132.025	56.9449
132.116	56.8567
132.208	56.8371
132.3	56.8194
132.392	56.741
132.485	56.6401
132.577	56.5989
132.668	56.5362
132.76	56.4676
132.852	56.4225
132.944	56.4715
133.037	56.4843
133.129	56.3794
133.22	56.2981
133.312	56.2589
133.404	56.1648
133.496	56.0482
133.588	55.9276
133.681	55.7718
133.772	55.614
133.864	55.4494
133.956	55.3151
134.048	55.1662
134.14	54.7693
134.232	53.8324
134.324	52.0449
134.416	48.7677
134.508	43.4032
134.6	35.4936
134.692	23.1888
134.784	9.39036
134.876	2.90766
134.968	1.34064
135.06	0.90846
135.152	0.56742
135.244	0.28322
135.335	0.29792
135.428	0.35966
135.52	0.23912
135.612	0.14308
135.704	0.1617
135.796	0.16366
135.887	0.16464
135.98	0.14602
136.072	0.15582
136.164	0.1568
136.256	0.14406
136.347	0.1666
136.439	0.15582
136.531	0.14406
136.624	0.1519
136.716	0.14798
136.808	0.1568
136.899	0.14896
136.991	0.15582
137.083	0.15386
137.176	0.14406
137.268	0.14504
137.36	0.14504
137.451	0.14994
137.543	0.14406
137.635	0.14014
137.728	0.15386
137.82	0.15092
137.911	0.14406
138.003	0.14112
138.095	0.13818
138.187	0.14308
138.279	0.13524
138.372	0.13132
138.463	0.14112
138.555	0.13916
138.647	0.13622
138.739	0.13426
138.831	0.14504
138.924	0.16856
139.015	0.147
139.107	0.17346
139.199	0.20874
139.291	0.17934
139.383	0.18032
139.475	0.20874
139.567	0.26362
139.659	0.3332
139.751	0.43414
139.843	0.87808
139.935	2.84886
140.026	8.11146
140.119	16.0279
140.211	24.2344
140.303	31.2424
140.395	37.487
140.487	42.7652
140.578	47.1478
140.67	50.8287
140.763	54.1244
140.855	56.9547
140.947	58.799
141.039	59.5468
141.13	59.6575
141.222	59.5144
141.315	59.3282
141.407	59.1077
141.499	58.9019
141.591	58.6432
141.682	58.3178
141.774	58.065
141.867	57.8808
141.959	57.6946
142.051	57.5211
142.142	57.378
142.234	57.2565
142.326	57.1164
142.418	56.9645
142.511	56.8478
142.603	56.6979
142.694	56.5646
142.786	56.4343
142.878	56.3265
142.97	56.2324
143.063	56.1109
143.155	55.9874
143.246	55.8933
143.338	55.8071
143.43	55.7042
143.522	55.6062
143.614	55.5356
143.706	55.4651
143.798	55.3984
143.89	55.323
143.982	55.2426
144.074	55.1809
144.166	55.1132
144.258	55.0231
144.35	54.9192
144.442	54.8477
144.534	54.7791
144.626	54.6742
144.718	54.588
144.809	54.5037
144.902	54.3802
144.994	54.2332
145.086	53.9951
145.178	53.6579
145.269	52.9955
145.361	51.5078
145.454	49.1215
145.546	46.2815
145.638	42.4663
145.73	36.601
145.821	26.8118
145.913	13.1153
146.006	4.05524
146.098	1.66404
146.19	0.80654
146.282	0.5684
146.373	0.42042
146.465	0.34888
146.557	0.22246
146.65	0.13524
146.742	0.12642
146.833	0.14896
146.925	0.14798
147.017	0.1421
147.109	0.1421
147.202	0.147
147.294	0.13426
147.385	0.1176
147.477	0.12642
147.569	0.14112
147.661	0.13818
147.753	0.14308
147.846	0.1519
147.937	0.14994
148.029	0.13034
148.121	0.13524
148.213	0.12936
148.305	0.1372
148.397	0.13622
148.489	0.13034
148.581	0.13916
148.673	0.14014
148.765	0.13328
148.857	0.13524
148.948	0.14014
149.041	0.1323
149.133	0.10486
149.225	0.09702
149.317	0.1078
149.408	0.11858
149.5	0.1176
149.593	0.1176
149.685	0.1127
149.777	0.098
149.869	0.10486
149.96	0.09604
150.052	0.0833
150.145	0.09114
150.237	0.09212
150.329	0.10192
150.421	0.10192
150.512	0.08918
150.604	0.09016
150.696	0.08232
150.789	0.09114
150.881	0.098
150.972	0.09898
151.064	0.1078
151.156	0.10682
151.248	0.10976
151.341	0.12348
151.433	0.13916
151.524	0.15974
151.616	0.19502
151.708	0.26558
151.8	0.3969
151.892	1.1319
151.985	6.0515
152.076	16.2935
152.168	25.6887
152.26	34.3441
152.352	42.0489
152.444	48.3797
152.536	53.3698
152.628	56.6675
152.72	58.5364
152.812	59.0666
152.904	58.8265
152.996	58.4599
153.088	58.1179
153.18	57.8435
153.272	57.6034
153.364	57.3614
153.456	57.1467
153.548	56.8831
153.639	56.6273
153.732	56.447
153.824	56.2951
153.916	56.1226
154.008	55.9668
154.099	55.8081
154.191	55.6366
154.284	55.5033
154.376	55.372
154.468	55.2397
154.56	55.0819
154.651	54.9604
154.743	54.8702
154.835	54.784
154.928	54.7222
155.02	54.6458
155.111	54.587
155.203	54.6066
155.295	54.6125
155.387	54.537
155.48	54.4184
155.572	54.2724
155.663	54.1519
155.755	54.1019
155.847	54.0607
155.939	53.9823
156.032	53.8745
156.124	53.7991
156.215	53.7363
156.307	53.6579
156.399	53.5639
156.491	53.4727
156.583	53.3845
156.676	53.2238
156.767	52.8524
156.859	52.0752
156.951	50.1574
157.043	47.1654
157.135	43.3562
157.227	37.8221
157.319	28.3632
157.411	15.0881
157.503	4.98036
157.595	2.06682
157.687	0.86044
157.778	0.60368
157.871	0.49588
157.963	0.3675
158.055	0.22148
158.147	0.20874
158.239	0.1421
158.33	0.12544
158.423	0.18032
158.515	0.13426
158.607	0.11074
158.699	0.13328
158.79	0.13132
158.882	0.1127
158.974	0.12642
159.067	0.12936
159.159	0.13916
159.251	0.12936
159.342	0.11858
159.434	0.11368
159.526	0.1029
159.619	0.11074
159.711	0.1372
159.803	0.10584
159.894	0.098
159.986	0.10976
160.078	0.11662
160.171	0.1127
160.263	0.1225
160.355	0.12642
160.446	0.10976
160.538	0.10878
160.63	0.10878
160.722	0.1078
160.815	0.11368
160.906	0.1078
160.998	0.11564
161.09	0.1225
161.182	0.11172
161.274	0.11564
161.367	0.11858
161.458	0.1176
161.55	0.1323
161.642	0.14994
161.734	0.22834
161.826	0.35476
161.918	0.58114
162.01	2.76066
162.102	10.1606
162.194	19.2354
162.286	27.7918
162.378	35.6024
162.47	42.1694
162.562	47.6643
162.654	52.2683
162.746	55.7777
162.838	57.9925
162.93	59.0519
163.021	59.4419
163.113	59.4586
163.206	59.2753
163.298	58.9784
163.39	58.6706
163.482	58.4139
163.573	58.2238
163.665	58.0513
163.758	57.9396
163.85	57.8572
163.942	57.724
164.034	57.5721
164.125	57.4819
164.217	57.5358
164.31	57.5015
164.402	57.3565
164.494	57.2663
164.585	57.184
164.677	57.084
164.769	56.9782
164.861	56.89
164.954	56.793
165.046	56.7175
165.137	56.6616
165.229	56.5715
165.321	56.4823
165.413	56.3921
165.506	56.3206
165.598	56.254
165.689	56.1971
165.781	56.1197
165.873	56.0217
165.965	55.9335
166.057	55.8639
166.15	55.8139
166.241	55.8149
166.333	55.8473
166.425	55.7953
166.517	55.6424
166.609	55.3729
166.701	54.7722
166.793	53.6334
166.885	51.8391
166.977	48.8158
167.069	44.3166
167.161	37.8211
167.252	27.1656
167.345	12.5293
167.437	4.87746
167.529	2.34318
167.621	0.70462
167.713	0.68796
167.804	0.76048
167.897	0.36652
167.989	0.28616
168.081	0.23912
168.173	0.15092
168.264	0.17052
168.356	0.22148
168.449	0.1813
168.541	0.23716
168.633	0.21266
168.725	0.1715
168.816	0.22834
168.908	0.20972
169	0.1911
169.093	0.20678
169.185	0.18326
169.277	0.18326
169.368	0.17836
169.46	0.15876
169.552	0.16366
169.645	0.15876
169.737	0.16562
169.828	0.1715
169.92	0.16366
170.012	0.16758
170.104	0.16366
170.196	0.16954
170.289	0.1715
170.38	0.15484
170.472	0.15288
170.564	0.14798
170.656	0.15778
170.748	0.1568
170.841	0.15484
170.932	0.15582
171.024	0.17052
171.116	0.17444
171.208	0.15092
171.3	0.1421
171.392	0.1372
171.484	0.1568
171.576	0.1666
171.668	0.15778
171.76	0.1617
171.852	0.15876
171.943	0.1617
172.036	0.18424
172.128	0.16856
172.22	0.15974
172.312	0.19306
172.404	0.18326
172.495	0.18032
172.588	0.2254
172.68	0.26754
172.772	0.38318
172.864	0.81242
172.955	3.63972
173.047	11.6012
173.139	20.6457
173.232	28.863
173.324	36.6138
173.416	43.2474
173.507	48.2131
173.599	51.5382
173.691	54.1744
173.784	56.5362
173.876	58.163
173.967	58.9999
174.059	59.3214
174.151	59.242
174.243	59.0234
174.336	58.8147
174.428	58.6138
174.519	58.4315
174.611	58.2698
174.703	58.1091
174.795	57.9307
174.887	57.724
174.979	57.479
175.071	57.2771
175.163	57.1105
175.255	56.9684
175.347	56.8214
175.439	56.6969
175.531	56.5695
175.623	56.4127
175.715	56.2804
175.807	56.1589
175.899	56.0433
175.991	55.9423
176.082	55.9041
176.175	55.8551
176.267	55.7728
176.359	55.7287
176.451	55.6307
176.542	55.5346
176.634	55.4249
176.727	55.3043
176.819	55.2142
176.911	55.1652
177.003	55.1828
177.094	55.1436
177.186	55.0642
177.278	54.9653
177.371	54.8761
177.463	54.7634
177.554	54.6125
177.646	54.4223
177.738	54.1185
177.83	53.7236
177.923	53.2169
178.015	52.2654
178.106	50.0192
178.198	46.7156
178.29	41.8695
178.382	33.1554
178.475	19.9851
178.567	7.58618
178.658	2.43824
178.75	1.06428
178.842	0.69286
178.934	0.47726
179.026	0.45374
179.118	0.34006
179.21	0.20678
179.302	0.17934
179.394	0.22638
179.486	0.20678
179.578	0.2156
179.67	0.22344
179.762	0.2107
179.854	0.19894
179.946	0.21266
180.038	0.19992
180.13	0.17738
180.221	0.19502
180.314	0.1911
180.406	0.19404
180.498	0.18914
180.59	0.18718
180.682	0.18816
180.773	0.19796
180.866	0.19306
180.958	0.19796
181.05	0.19502
181.142	0.1862
181.233	0.18522
181.325	0.19306
181.417	0.18326
181.51	0.18914
181.602	0.20286
181.694	0.19208
181.785	0.17738
181.877	0.17542
181.969	0.17346
182.062	0.1764
182.154	0.18228
182.245	0.19404
182.337	0.19894
182.429	0.19208
182.521	0.18424
182.614	0.18522
182.706	0.17738
182.797	0.19306
182.889	0.27244
182.981	0.3969
183.073	0.74382
183.165	3.77986
183.258	13.3319
183.349	23.7336
183.441	32.1724
183.533	39.5655
183.625	45.4769
183.717	50.0594
183.809	53.5482
183.901	56.1952
183.993	58.0532
184.085	59.0568
184.177	59.24
[truncated: 3,490 more rows]

[truncated: 3 more sheets: S05-Right hand, S06-Left hand, S06-Right hand]
